# Supplementary material for: Physicians’ perceptions of the uptake of biosimilars: a systematic review
Source: PubMed Central journal article supplement — BMJ Open. 2020 May 5;10(5):e034183. doi: 10.1136/bmjopen-2019-034183 (PMC7228507; doi:10.1136/bmjopen-2019-034183), 2020-05-05
Supplement: bmjopen-2019-034183.draft_revisions.pdf [file bmjopen-2019-034183.draft_revisions.pdf]

# BMJ Open

BMJ Open is committed to open peer review. As part of this commitment we make the peer review history of every article we publish publicly available.

When an article is published we post the peer reviewers' comments and the authors' responses online. We also post the versions of the paper that were used during peer review. These are the versions that the peer review comments apply to.

The versions of the paper that follow are the versions that were submitted during the peer review process. They are not the versions of record or the final published versions. They should not be cited or distributed as the published version of this manuscript.

BMJ Open is an open access journal and the full, final, typeset and author-corrected version of record of the manuscript is available on our site with no access controls, subscription charges or pay-per-view fees (<http://bmjopen.bmj.com>).

If you have any questions on BMJ Open's open peer review process please email [info.bmjopen@bmj.com](mailto:info.bmjopen@bmj.com)

# BMJ Open

## Physicians' perceptions on the uptake of biosimilars - A systematic literature review

|                               |                                                                                                                                                                                                                                                                                                                                                                   |
|-------------------------------|-------------------------------------------------------------------------------------------------------------------------------------------------------------------------------------------------------------------------------------------------------------------------------------------------------------------------------------------------------------------|
| Journal:                      | <i>BMJ Open</i>                                                                                                                                                                                                                                                                                                                                                   |
| Manuscript ID                 | bmjopen-2019-034183                                                                                                                                                                                                                                                                                                                                               |
| Article Type:                 | Original research                                                                                                                                                                                                                                                                                                                                                 |
| Date Submitted by the Author: | 10-Sep-2019                                                                                                                                                                                                                                                                                                                                                       |
| Complete List of Authors:     | Sarnola, Kati; Finnish Medicines Agency Fimea, Assessment of Pharmacotherapies<br>Merikoski, Merja; City of Kuopio; Finnish Medicines Agency Fimea, Assessment of Pharmacotherapies<br>Jyrkka, Johanna; Finnish Medicines Agency FIMEA, Assessment of Pharmacotherapies<br>Hämeen-Anttila, Katri; Finnish Medicines Agency FIMEA, Assessment of Pharmacotherapies |
| Keywords:                     | biosimilar, biologic medicine, physician, perception, systematic literature review                                                                                                                                                                                                                                                                                |
|                               |                                                                                                                                                                                                                                                                                                                                                                   |

SCHOLARONE™  
Manuscripts

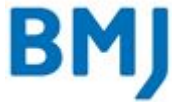

I, the Submitting Author has the right to grant and does grant on behalf of all authors of the Work (as defined in the below author licence), an exclusive licence and/or a non-exclusive licence for contributions from authors who are: i) UK Crown employees; ii) where BMJ has agreed a CC-BY licence shall apply, and/or iii) in accordance with the terms applicable for US Federal Government officers or employees acting as part of their official duties; on a worldwide, perpetual, irrevocable, royalty-free basis to BMJ Publishing Group Ltd ("BMJ") its licensees and where the relevant Journal is co-owned by BMJ to the co-owners of the Journal, to publish the Work in this journal and any other BMJ products and to exploit all rights, as set out in our [licence](#).

The Submitting Author accepts and understands that any supply made under these terms is made by BMJ to the Submitting Author unless you are acting as an employee on behalf of your employer or a postgraduate student of an affiliated institution which is paying any applicable article publishing charge ("APC") for Open Access articles. Where the Submitting Author wishes to make the Work available on an Open Access basis (and intends to pay the relevant APC), the terms of reuse of such Open Access shall be governed by a Creative Commons licence – details of these licences and which [Creative Commons](#) licence will apply to this Work are set out in our licence referred to above.

Other than as permitted in any relevant BMJ Author's Self Archiving Policies, I confirm this Work has not been accepted for publication elsewhere, is not being considered for publication elsewhere and does not duplicate material already published. I confirm all authors consent to publication of this Work and authorise the granting of this licence.

## Physicians' perceptions on the uptake of biosimilars - A systematic literature review

Kati Sarnola<sup>1\*</sup>, Merja Merikoski<sup>1,2</sup>, Johanna Jyrkkä<sup>1</sup>, Katri Hämeen-Anttila<sup>1</sup>

<sup>1</sup> Finnish Medicines Agency, P.O.Box 55, 000034 FIMEA, Finland

<sup>2</sup> City of Kuopio, Finland

\* Corresponding author: Kati Sarnola, kati.sarnola@fimea.fi, +358 29 522 35 24, ORCID: 0000-0003-1300-7482

### WORD COUNT

Word count (excluding title page, abstract, references, figures, tables and appendices): 2884

### ABSTRACT

**Objectives:** Examine physicians' perceptions on the uptake of biosimilars

**Design:** Systematic literature review

**Setting:** Literature search in MedLine Ovid and Scopus databases at the end of 2018. Search resulted to 451 publications and after removal of duplicates, to 331 publications. Publications were examined based on the title, abstract and the entire text by two researchers. Twenty-one scientific original publications written in English that addressed physicians' perceptions on the uptake of biosimilars were selected for further analysis. Additionally, the references of selected articles were screened and two articles were handpicked and included in this review. Data of these 23 publications were extracted study-by-study basis. All publications were quality assessed by two researchers. In this review, higher emphasis was given to publications with high-assessed quality.

**Results:** Majority of selected studies were conducted in Europe and they commonly utilized short surveys. Physicians' familiarity of biosimilars varied: 49–76% were familiar with biosimilars and 2–25% did not know what biosimilars are. Measured knowledge appeared weaker compared to self-assessed knowledge. Physicians' perceptions towards biosimilars also varied: 54–94% were confident prescribing biosimilars, while 65–67% had concerns regarding these medicines. Physicians seem to prefer originator products to biosimilars and prescribe biosimilars mainly for biologic-naïve patients. Physicians consider cost savings and lower price in comparison to the originator biologic medicine as main advantages of biosimilars, while doubts often relate to safety, efficacy and immunogenicity. 64–95% of physicians have negative perceptions towards pharmacist-led substitution of biologic medicines.

**Conclusions:** Physicians' knowledge on and attitudes towards biosimilars vary. Although physicians had positive attitudes towards biosimilars, prescribing is limited, especially for patients that are already treated with biologic medicines. Perceptions towards the pharmacist-led substitution of biologic medicines are often negative. Education and national recommendations and policies for switching and substitution of biologic medicines are needed to support the uptake of biosimilars.

### STRENGTHS AND LIMITATIONS OF THIS STUDY

- This is the first systematic review conducted on the physicians' perceptions towards the uptake of biosimilars
- The literature search was conducted with the help of an experienced information specialist
- Publications selected for this review were quality evaluated by two researchers independently
- The evaluation protocol was compiled from four existing evaluation protocols

## KEYWORDS

biosimilar, biologic medicine, physician, perception, systematic literature review

## 1 INTRODUCTION

Biologic medicines consist of one or multiple biologic active substances and are often manufactured through biotechnology<sup>1-2</sup>. Biologic medicines were first developed mainly for rare diseases, but have thereafter improved the treatment of many common diseases, such as diabetes, arthritis and psoriasis<sup>1</sup>. The flipside of this transformation are high costs of biologic medicines that have contributed to increased medical costs globally<sup>3</sup>.

Biosimilars are biologic medicines highly similar to the originator biologic medicines with same standards on the quality, safety and efficacy of the products<sup>2-4</sup>. Biosimilars have no clinically meaningful differences to the existing reference product. Biosimilars are not regarded as generic medicines due to the complex manufacturing process and the natural variability between manufacturing batches of biologic medicines. The comparability of the product to the reference product has to be demonstrated, however, clinical trials are not required. As a result, biosimilars can be brought to the market with less expensive price in comparison to the originator biologic product. The uptake of biosimilars could lead to healthcare cost savings and better patient access to costly biologic therapies<sup>5</sup>. Until the end of 2018, 50 biosimilars have received marketing authorisation in Europe and 15 in the United States<sup>6-7</sup>.

Regardless of the demonstrated comparability and their cost-saving potential, biosimilars have not fully penetrated the market of biologic medicines. The European Union holds 80% of global biosimilar market, but biosimilars constitute only 1% of total sales of biologic medicines<sup>8-9</sup>. It has been stated that the decisions of selecting biologic medicines are either policy driven or made by individual physicians, which has raised a need to assess the prescribing of biosimilars in a critical manner<sup>10-11</sup>. Physicians' attitudes towards and perceptions on the uptake of biosimilars have not been systematically reviewed, and published information on the topic is somewhat contradictory. The aim of this systematic literature review was to examine physicians' perceptions on the uptake of biosimilars.

## 2 MATERIAL AND METHODS

### Literature search

A systematic literature search was conducted in MedLine Ovid and Scopus databases at the end of 2018. Selected databases provide a comprehensive selection of scientific publications from the disciplines of pharmacy and medicine. The search approach (**Appendix 1**) was set by the research group and the search was conducted by an information specialist.

The initial search resulted of 451 publications. After removal of duplicates (n=120), 331 publications remained. Publications were examined based on the title, abstract and the entire text by two researchers independently (KS and MM). Of the 331 publications, 151 were excluded based on the title, 148 based on the abstract and 11 based on the entire text. At each stage, researchers shared their views of the publications, discussed on possible differences on opinions and conducted a shared opinion based on the discussion. The inclusion and exclusion criteria of this systematic review are presented in **Table 1**. A total of 21 publications were selected for further analysis. Furthermore, the references of these 21 articles were screened and two articles that met the inclusion criteria were handpicked and included in this review, the final number of publications being 23. The flow chart on the review process is presented in **Figure 1**.

Table 1. Inclusion and exclusion criteria of publications of this systematic review.

| Inclusion criteria                                                                                                                                                                                                                                                                              | Exclusion criteria                                                                                                                                                                                                                                                                                           |
|-------------------------------------------------------------------------------------------------------------------------------------------------------------------------------------------------------------------------------------------------------------------------------------------------|--------------------------------------------------------------------------------------------------------------------------------------------------------------------------------------------------------------------------------------------------------------------------------------------------------------|
| <ul style="list-style-type: none"> <li>Scientific original publications</li> </ul>                                                                                                                                                                                                              | <ul style="list-style-type: none"> <li>Other than scientific original publications, such as conference papers, consensus papers, commentaries and letters to editors</li> </ul>                                                                                                                              |
| <ul style="list-style-type: none"> <li>English language</li> </ul>                                                                                                                                                                                                                              | <ul style="list-style-type: none"> <li>Other language than English</li> </ul>                                                                                                                                                                                                                                |
| <ul style="list-style-type: none"> <li>Investigating physicians' perceptions on the uptake of biosimilars (physicians in particular or at least 45% of physicians among other healthcare professionals, although only physicians perceptions were taken into account in this review)</li> </ul> | <ul style="list-style-type: none"> <li>Investigating other healthcare professionals' perceptions on the uptake of biosimilars or publications with less than 45% of physicians of all participants involved or in which the physicians' perceptions are not separated in the results of the study</li> </ul> |
| <ul style="list-style-type: none"> <li>Publications on the physicians' perceptions on the automatic substitution of biologic medicines</li> </ul>                                                                                                                                               | <ul style="list-style-type: none"> <li>Publications on the physicians' perceptions on the automatic or generic substitution of other medicines than biologics</li> </ul>                                                                                                                                     |

### Quality assessment

Each of the 23 selected publications was concisely reviewed. Quality assessment was based on the protocol that was adapted from the protocols of Åkesson et al. (2006), Tong et al. (2007), Joanna Briggs Institute (2014) and Swedish Agency for Health Technology Assessment and Assessment of Social Services (2016)<sup>12-15</sup> (**Appendix 2**). Two researchers (KS and MM) conducted quality assessments individually and then compared their reviews. Differences in opinions (n=6) were discussed and final evaluation was set in consensus. In the Results section of this systematic review, publications with high-assessed quality are emphasized in comparison to the results of those with moderate or low assessed quality.

### Data extraction and analysis

Following information of each publications were extracted to a table: general information (authors, year of publication, and country of publication), aims, methods and results. In regards to results, seven topics for data extraction were identified based on the topics discussed in the publications and on the discussion in the research group. These topics were: physicians' 1) self-rated knowledge of biosimilars, 2) measured knowledge on biosimilars, 3) information sources of biologic medicines, 4) attitudes towards and experienced advantages and disadvantages of biosimilars, 5) actions in the initiation of biosimilars for biologic-naïve patients, 6) actions in the switches between originators and biosimilars for patients already treated with biologic medicines and 7) thoughts on pharmacist-led substitution of biologic medicines. In the Results section of this systematic review, these seven topics are discussed within four broader themes: physicians' 1) self-rated and measured knowledge on biosimilars and information sources on biologic medicines, 2) attitudes towards and experienced advantages and disadvantages of biosimilars, 3) perceptions on the treatment initiations with biosimilars and on the switches between originator biologic medicines and biosimilars and 4) attitudes towards pharmacist-led substitution of biologic medicines.

## 3 RESULTS

### Study characteristics

Physicians' perceptions on biosimilars have been studied mainly in European (n=15)<sup>10, 16-28</sup> and North American (n=4)<sup>29-32</sup> countries, apart from studies conducted both in Europe and North America (n=1)<sup>33</sup>, Australia (n=1)<sup>34</sup>, New Zealand (n=1)<sup>35</sup>, Central and South America (n=1)<sup>36</sup> and in multiple African, European and Middle Eastern countries (n=1)<sup>37</sup> (**Table 2**). All publications were published between 2014 and 2019, but majority of them (n=19)<sup>10, 16, 19-21, 23-32, 34-37</sup> in 2017 or before. With the exception of a single publication<sup>33</sup>, the data presented in the publications

1  
2  
3  
4  
5  
6  
7  
8  
9  
10  
11  
12  
13  
14  
15  
16  
17  
18  
19  
20  
21  
22  
23  
24  
25  
26  
27  
28  
29  
30  
31  
32  
33  
34  
35  
36  
37  
38  
39  
40  
41  
42  
43  
44  
45  
46

Table 2. Summary of the 23 publications selected for this systematic review.

| Reference (Country or region)                         | Aims and methods                                                                                                                                                                                                                                                                                                                                                                                                                             | Results                                                                                                                                                                                                              |                                                                                                                               |                                                                                                                                                              |                                                                                                                                                                                                                                                                                                                                                                                                                                                                                                                                                                                                                                                                                                                                                                                                                                                                                                                                                                                                                                                             |                                                                                                                                                                                                                                                                                                                                                                                                                                                                                                |                                                                                                                                                                                                                                                                                                                                                                                                                                  |                                                                                                                                                                                                                      |
|-------------------------------------------------------|----------------------------------------------------------------------------------------------------------------------------------------------------------------------------------------------------------------------------------------------------------------------------------------------------------------------------------------------------------------------------------------------------------------------------------------------|----------------------------------------------------------------------------------------------------------------------------------------------------------------------------------------------------------------------|-------------------------------------------------------------------------------------------------------------------------------|--------------------------------------------------------------------------------------------------------------------------------------------------------------|-------------------------------------------------------------------------------------------------------------------------------------------------------------------------------------------------------------------------------------------------------------------------------------------------------------------------------------------------------------------------------------------------------------------------------------------------------------------------------------------------------------------------------------------------------------------------------------------------------------------------------------------------------------------------------------------------------------------------------------------------------------------------------------------------------------------------------------------------------------------------------------------------------------------------------------------------------------------------------------------------------------------------------------------------------------|------------------------------------------------------------------------------------------------------------------------------------------------------------------------------------------------------------------------------------------------------------------------------------------------------------------------------------------------------------------------------------------------------------------------------------------------------------------------------------------------|----------------------------------------------------------------------------------------------------------------------------------------------------------------------------------------------------------------------------------------------------------------------------------------------------------------------------------------------------------------------------------------------------------------------------------|----------------------------------------------------------------------------------------------------------------------------------------------------------------------------------------------------------------------|
|                                                       |                                                                                                                                                                                                                                                                                                                                                                                                                                              | Self-rated knowledge                                                                                                                                                                                                 | Measured knowledge                                                                                                            | Information sources                                                                                                                                          | Attitudes towards and experienced advantages and disadvantages of biosimilars                                                                                                                                                                                                                                                                                                                                                                                                                                                                                                                                                                                                                                                                                                                                                                                                                                                                                                                                                                               | Initiation of biosimilars (biologic-naïve patients)                                                                                                                                                                                                                                                                                                                                                                                                                                            | Switches between originators and biosimilars (patients already treated with biologics)                                                                                                                                                                                                                                                                                                                                           | Pharmacist-led substitution of biologic medicines                                                                                                                                                                    |
| Akhmetov et al. 2015 <sup>16</sup> (Ukraine)          | Endocrinologists', oncologists', nephrologists', immunologists' and rheumatologists' awareness of biosimilars<br><br>Short interviews with eight close-ended questions, including 6 Likert-type items (n=82), time of the study not reported                                                                                                                                                                                                 | Low to medium levels (not reported more specifically) of biosimilar awareness on a 1-5 scale, where 1=low and 5=high<br><br>Endocrinologists and nephrologists had higher levels of awareness than other respondents | N/A                                                                                                                           | Peer-reviewed journal articles (n=35), internet (n=31), medical conferences (n=20), popular press (n=9), key-opinion leaders (n=3), drug manufacturers (n=2) | On a 1-5 scale, likelihood of prescribing biosimilars: 68% average (specific numbers not reported), 23% below average and 9% above average<br><br>Majority (n not reported) are likely to try biosimilars in small batches, and then gradually move to larger groups of patients, endocrinologists and nephrologists showing the greatest interest<br><br>Facilitators of prescribing: 39% cost advantage, 22% certification of safety by EMA or FDA, 22% certification of efficacy by EMA or FDA, 10% propitiousness of the Cabinet of Ministers and 7% trust towards European, American and Japanese biotech companies as importers<br><br>Majority (n not reported) required 40-50% lower price for biosimilars than original biologics, endocrinologists typically accepting 20-30% discount in comparison to rheumatologists and oncologists that anticipated over 50% discount                                                                                                                                                                        | N/A                                                                                                                                                                                                                                                                                                                                                                                                                                                                                            | N/A                                                                                                                                                                                                                                                                                                                                                                                                                              | N/A                                                                                                                                                                                                                  |
| Aladul et al. 2019 <sup>17</sup> (the United Kingdom) | Knowledge and attitudes of healthcare professionals (n=150 dermatologists, diabetologists, gastroenterologists and rheumatologists) towards infliximab and insulin glargine biosimilars<br><br>Web-based survey via selected medical associations between August 2016 and January 2017                                                                                                                                                       | 80% were aware that biosimilars were available on their local formulary                                                                                                                                              | 76% correctly considered biosimilars as copies of originators                                                                 | N/A                                                                                                                                                          | 91% considered robust pharmacovigilance studies and 84% the costs as the most important influencer of their prescribing of biosimilars                                                                                                                                                                                                                                                                                                                                                                                                                                                                                                                                                                                                                                                                                                                                                                                                                                                                                                                      | 22% had major concerns on the efficacy and 14% on the safety of biosimilars that prevented them of starting a biosimilar                                                                                                                                                                                                                                                                                                                                                                       | 50% had major concerns on the efficacy and 34% on the safety of biosimilars in the switches                                                                                                                                                                                                                                                                                                                                      | N/A                                                                                                                                                                                                                  |
| Aladul et al. 2018 <sup>18</sup> (the United Kingdom) | Perceptions of consultants with specialities of diabetes mellitus, ulcerative colitis, Crohn's disease, rheumatoid arthritis, ankylosing spondylitis and psoriatic arthritis (n=10) towards biosimilar infliximab, etanercept and insulin glargine and potential barriers and facilitators to their prescribing<br><br>Semi-structured interviews of purposive convenience sample of West Midlands hospital staff between June-November 2017 | N/A                                                                                                                                                                                                                  | All interviewees expressed an understanding of the concept of biosimilars and believed biosimilars were copies of originators | Conferences, pharmaceutical industry representatives, scientific journals and colleagues                                                                     | Majority of rheumatologists and diabetologists (n not reported) would prescribe the reference product if the prices of the reference product and the biosimilar are equal<br><br>Gastroenterologists expressed more confidence and fewer concerns than other specialists, stating that indication extrapolation had previously been the major obstacle in the biosimilar uptake, but that it had been overcome<br><br>Majority of rheumatologists (n not reported) had concerns on indication extrapolation, considering their patients are very sensitive with higher multimorbid risks. Some rheumatologists (n not reported) openly declared being mistrustful on biosimilars<br><br>Facilitators of prescribing were information from societies, authorities and national registries. Barriers of prescribing were unexpected adverse effects or increase in side effects, patients' reluctance on using biosimilars, complicated, unsuitable or non-user-friendly administration device, unavailability of dose strengths in comparison to originators | Majority (n not reported) were content to initiate biosimilars<br><br>Minority of rheumatologists and diabetologists (n not reported) felt under pressure to initiate new patients with biosimilars by their organization<br><br>Two rheumatologists were happier to initiate biosimilars rather than switching                                                                                                                                                                                | All gastroenterologists (n=7) and a minority of rheumatologists (n not reported) were content to switch patients from reference products to a biosimilar<br><br>All those that were content with switching considered that patients should be given the choice between the products<br><br>Majority of all physicians (n not reported) felt multiple switching based on cost reasons irrational                                  | Majority (n not reported) has negative view on the pharmacist-led substitution of biologic medicines<br><br>Minority (n not reported) considered that automatic substitution would be accepted in the next few years |
| Baji et al. 2016a <sup>19</sup> (Hungary)             | Gastroenterologists' treatment preferences in ulcerative colitis<br><br>Discrete choice experiment survey (in which prescribers are given hypothetical scenario and possible treatment options, and they are asked to choose the alternative they prefer <sup>20</sup> ) in a Hungarian professional society meeting in 2014 (n=51)                                                                                                          | N/A                                                                                                                                                                                                                  | N/A                                                                                                                           | N/A                                                                                                                                                          | 20% had no concerns on biosimilars, 67% had some concerns on efficacy and/or safety and 12% did not support the use of biosimilars due to the lack of RCT evidence                                                                                                                                                                                                                                                                                                                                                                                                                                                                                                                                                                                                                                                                                                                                                                                                                                                                                          | 84% of all physicians and 80% of those who had some concerns (67%) chose biosimilar in at least one choice set<br><br>The most important attribute driving the choice: stopping rule (whether treatment after 12 months is reimbursed)<br><br>Estimated probability of choosing the originator over biosimilar in the present reimbursement situation: 48%. Probability of choosing the biosimilars with all the benefits offered over the originator in the present situation: 85% versus 15% | 61% of all and 53% of those who were concerned chose biosimilar in at least one of the choice sets<br><br>The most important attribute driving the choice: stopping rule<br><br>Estimated probability of choosing the originator over biosimilar in the present reimbursement situation: 71%. Probability of choosing the biosimilars with all the benefits offered over the originator in the present situation: 63% versus 37% | N/A                                                                                                                                                                                                                  |

|                                                          |                                                        |                                                                                                                                                                                                                                                                                                                                                                                                                                                                                                                                             |                                                                                                                                                                                                                                                                                        |                                                                                                                                                                                                                                                                                                                                                                                                                                    |                                                                                                                                                           |                                                                                                                                                                                                                                                                                                                                                                                                                                                                                                                                                                                 |                                                                                                                                                                                                                                                                                                                                                                                                                                                                                                             |                                                                                                                                                                                                                                                                                                            |                                                                                                                                                                                                                                                                     |
|----------------------------------------------------------|--------------------------------------------------------|---------------------------------------------------------------------------------------------------------------------------------------------------------------------------------------------------------------------------------------------------------------------------------------------------------------------------------------------------------------------------------------------------------------------------------------------------------------------------------------------------------------------------------------------|----------------------------------------------------------------------------------------------------------------------------------------------------------------------------------------------------------------------------------------------------------------------------------------|------------------------------------------------------------------------------------------------------------------------------------------------------------------------------------------------------------------------------------------------------------------------------------------------------------------------------------------------------------------------------------------------------------------------------------|-----------------------------------------------------------------------------------------------------------------------------------------------------------|---------------------------------------------------------------------------------------------------------------------------------------------------------------------------------------------------------------------------------------------------------------------------------------------------------------------------------------------------------------------------------------------------------------------------------------------------------------------------------------------------------------------------------------------------------------------------------|-------------------------------------------------------------------------------------------------------------------------------------------------------------------------------------------------------------------------------------------------------------------------------------------------------------------------------------------------------------------------------------------------------------------------------------------------------------------------------------------------------------|------------------------------------------------------------------------------------------------------------------------------------------------------------------------------------------------------------------------------------------------------------------------------------------------------------|---------------------------------------------------------------------------------------------------------------------------------------------------------------------------------------------------------------------------------------------------------------------|
| 1<br>2<br>3<br>4<br>5<br>6<br>7<br>8<br>9<br>10<br>11    | Baji et al. 2016b <sup>20</sup> (Hungary)              | Gastroenterologists' treatment preferences in Crohn's disease<br><br>Discrete choice experiment survey (in which prescribers are given hypothetical scenario and possible treatment options, and they are asked to choose the alternative they prefer <sup>20</sup> ) in a Hungarian professional society meeting in 2014 (n=51)                                                                                                                                                                                                            | N/A                                                                                                                                                                                                                                                                                    | N/A                                                                                                                                                                                                                                                                                                                                                                                                                                | N/A                                                                                                                                                       | 20% had no concerns on biosimilars, 65% had some concerns on efficacy and/or safety and 12% did not support the use of biosimilars due to the lack of RCT evidence<br><br>Four clinicians were classified to "No biosimilar" attitude group, 19 to the "Biosimilar to new patients only" group and 27 to the "Biosimilar" group (one clinician was excluded from the analysis)                                                                                                                                                                                                  | Men, senior consultants, working in inflammatory bowel disease centre and treating more patients were more likely to consider biosimilars for biologic-naïve patients only<br><br>Estimated probability of choosing the originator over biosimilar, when no benefits are offered for using the biosimilar: 60%. Probability of choosing the biosimilar with all kinds of benefits over the originator: 89% versus 11%<br><br>The most important attribute driving the choice: continuity of medicine supply | Estimated probability of choosing the originator over biosimilar, when no benefits are offered for using the biosimilar: 74%. Probability of choosing the biosimilar with all kinds of benefits over the originator: 44% versus 56%<br><br>The most important determinant of choice: type of the treatment | N/A                                                                                                                                                                                                                                                                 |
| 12<br>13<br>14<br>15<br>16<br>17<br>18                   | Barsell et al. 2017 <sup>29</sup> (USA)                | Dermatologists' knowledge and perceptions of biosimilars, whether a practice gap exists and to study misconception and barriers to biosimilar usage<br><br>Web survey of 14 multiple-choice questions for the members of five state dermatologic societies and National Psoriasis Foundation in 2015 (n=97)                                                                                                                                                                                                                                 | 62% responded having basic understanding of biosimilars, 27% complete understanding and 11% that they have never heard of biosimilars                                                                                                                                                  | 37% were aware that biosimilars are highly similar to the reference product, 26% described biosimilar as "generic", 27% described them as same bio-drug with equal bioequivalence and 10% said they did not know the definition. Those with complete understanding (27%), 21% incorrectly described biosimilar as "generic"                                                                                                        | 35% self-study, 25% scientific publications, 17% conferences and seminars, 3% biosimilar company-sponsored events and 20% other                           | Advantages: 71% low price to patients, 68% easier access to treatment and 65% low price to payers. Disadvantages: 71% efficacy, 66% potential switch to biosimilar without physicians' knowledge, 66% safety and 63% immunogenicity. 8% believed there were no advantages<br><br>Convincing physicians of interchangeability: 44% extensive phase I, II and III studies, 37% valid longitudinal data from patient registries, 37% same level of testing (not specified more thoroughly) than generic medicines, 36% evidence of pharmacokinetic and pharmacodynamic equivalence | 25% definitely or highly likely to prescribe a biosimilar<br><br>38% will try it on very selected patients                                                                                                                                                                                                                                                                                                                                                                                                  | N/A                                                                                                                                                                                                                                                                                                        | 88% believed that there will be a political change resulting to pharmacist-led substitution without consulting physicians in the future<br><br>76% very important and 18% somewhat important to have control over whether patients receive originator or biosimilar |
| 19<br>20<br>21<br>22<br>23<br>24<br>25<br>26<br>27<br>28 | Beck et al. 2016 <sup>31</sup> (France)                | Knowledge, experience and opinions related to biosimilars and to identify expectations, barriers and possible options to promote prescription<br><br>Web survey of 22 questions for nearly 500 rheumatologists in 2015 (n=116)                                                                                                                                                                                                                                                                                                              | 55%/3% considered they had little/no knowledge of biosimilars<br><br>5% felt very well-informed<br><br>Hospital-based rheumatologists were likely to be more familiar with biosimilars compared to office-based rheumatologists<br><br>98% had at least one question about biosimilars | 85% thought biosimilars are similar to reference products that had gone off-patent; 85% considered biosimilars have no meaningful differences in quality, 80% in safety and 90% in efficacy; 65% thought that the assessment of biosimilarity requires more comprehensive data than generic drugs; and 46% believed that biosimilar marketing authorisation is granted on the sole investigation of pharmacokinetic bioequivalence | 84% self-study and scientific publications, 76% pharmaceutical companies, 72% continuous training, 54% physician colleagues and 13% pharmacist colleagues | 44% agree and 10% strongly agree being in favour of implementation of biosimilars<br><br>Positive factors: 90% healthcare cost savings, 61% releasing of resources allowing treating additional patients, 49% positive impact on patients' access to innovative medicines and 46% health policy-makers incentives. Barriers: 67% indication extrapolation of efficacy and safety, 66% lack of information about tolerability, 59% risk of increasing patients' concerns, 57% lack of clinical trials and 55% patients' wishes to be treated with the originator                 | 7% had already prescribed biosimilars mentioned in the survey<br><br>89% considered it was conceivable to start a treatment for biologic-naïve patients                                                                                                                                                                                                                                                                                                                                                     | 25% could envision a switch                                                                                                                                                                                                                                                                                | 58% strongly disagree and 23% disagree of approving substitution by a pharmacist                                                                                                                                                                                    |
| 29<br>30<br>31<br>32<br>33<br>34<br>35<br>36<br>37       | Chapman et al. 2018 <sup>22</sup> (the United Kingdom) | Healthcare professionals' knowledge and attitudes towards infliximab and insulin glargine biosimilars and factors influencing their prescribing and compare healthcare professionals' attitudes with the utilisation of these biosimilars in hospitals<br><br>Web-based survey of 11 questions for societies of dermatology, diabetology, gastroenterology and rheumatology in 2016-2017 and drug utilisation analysis from DEFINE database in 2015-2016 (n=234). Other stakeholders apart from physicians are not addressed in this review | N/A                                                                                                                                                                                                                                                                                    | 72% correctly thought biosimilars are similar copies of biologic medicines, 18% thought biosimilars are generic biologic medicines, 3% counterfeit medicines, 3% had heard of them but did not know what they were, 3% had never heard of them and 1% new biological medicines<br><br>75% knew biosimilars were available on their local formulary                                                                                 | N/A                                                                                                                                                       | Gastroenterologists were most frequent prescribers of biosimilars (prescribing every day or week), followed by rheumatologists, diabetologists and dermatologists<br><br>The dominant consideration: cost saving<br><br>Increasing the use of biosimilars: regulatory guidance and robust pharmacovigilance studies, local policy, potential cost saving to organisation (whether or not savings were invested in the prescribers' department) and robust cost-effectiveness data of biosimilar vs. originator                                                                  | 95% and 90% of gastroenterologists, 92% of rheumatologists, 79% of dermatologists and 75% of diabetologists had no or minor concerns on safety<br><br>90% of gastroenterologists, 88% of rheumatologists, 74% of dermatologists and 68% of diabetologists had no or minor concerns on efficacy                                                                                                                                                                                                              | 95% of gastroenterologists, 53% of rheumatologists, 78% of dermatologists and 69% of diabetologists had no or minor concerns on safety<br><br>93% of gastroenterologists, 55% of rheumatologists, 79% of dermatologists and 65% of diabetologists had no or minor concerns on efficacy                     | N/A                                                                                                                                                                                                                                                                 |
| 38<br>39<br>40<br>41<br>42<br>43<br>44<br>45<br>46       | Cohen et al. 2016 <sup>30</sup> (USA)                  | Dermatologists', gastroenterologists', haematologist-oncologists', medical oncologists', nephrologists' and rheumatologists' awareness, knowledge, and                                                                                                                                                                                                                                                                                                                                                                                      | N/A                                                                                                                                                                                                                                                                                    | 92% of dermatologists, 90% of gastroenterologists, 83% of rheumatologists, 74%                                                                                                                                                                                                                                                                                                                                                     | 88% scientific journals, 73% FDA and 64% physician peers. Trust to media was less than 5%                                                                 | Generally positive attitudes towards biosimilars. Dermatologists and rheumatologists appear less enthusiastic                                                                                                                                                                                                                                                                                                                                                                                                                                                                   | N/A                                                                                                                                                                                                                                                                                                                                                                                                                                                                                                         | 91% open to switching patients to a biosimilar                                                                                                                                                                                                                                                             | N/A                                                                                                                                                                                                                                                                 |



|                                                                                                                 |                                                                                                                                                                                                                                                                                                                                                                                                                                                                                                                  |                                                                                                                        |                                                                                                                                                                                                                                                                                                                                                                                                             |                                                                                                                                                                                                                                                                                                                              |                                                                                                                                                                                                                                                                                                                                                                                                                                                                                                                                                                                                                                                                                                                                                                                         |                                                                                                                                                             |                                                                                                                               |                                                                                                                                                        |
|-----------------------------------------------------------------------------------------------------------------|------------------------------------------------------------------------------------------------------------------------------------------------------------------------------------------------------------------------------------------------------------------------------------------------------------------------------------------------------------------------------------------------------------------------------------------------------------------------------------------------------------------|------------------------------------------------------------------------------------------------------------------------|-------------------------------------------------------------------------------------------------------------------------------------------------------------------------------------------------------------------------------------------------------------------------------------------------------------------------------------------------------------------------------------------------------------|------------------------------------------------------------------------------------------------------------------------------------------------------------------------------------------------------------------------------------------------------------------------------------------------------------------------------|-----------------------------------------------------------------------------------------------------------------------------------------------------------------------------------------------------------------------------------------------------------------------------------------------------------------------------------------------------------------------------------------------------------------------------------------------------------------------------------------------------------------------------------------------------------------------------------------------------------------------------------------------------------------------------------------------------------------------------------------------------------------------------------------|-------------------------------------------------------------------------------------------------------------------------------------------------------------|-------------------------------------------------------------------------------------------------------------------------------|--------------------------------------------------------------------------------------------------------------------------------------------------------|
|                                                                                                                 | perceptions of biosimilars over time (survey will be repeated in 2-3 years)<br><br>Survey of 19 questions in 2015-2016 (n=1201)                                                                                                                                                                                                                                                                                                                                                                                  |                                                                                                                        | of nephrologists, 69% of haematologist-oncologists and 63% of medical oncologists were aware which of the listed medicines in their specialty were biologic<br><br>56% of rheumatologists, 33% of gastroenterologists, 31% of dermatologists, 15% of nephrologists, 9% of medical-oncologists and 3% of haematologist-oncologists incorrectly reported there are no biosimilars available                   |                                                                                                                                                                                                                                                                                                                              | 62% considered the biosimilar will have equivalent efficacy as its originator and 57% that the biosimilar will be at least as safe as the originator<br><br>58% had concerns on patient compliance and access to treatments options with originators<br><br>Positive factors: increased access and utilization of biologic medicines, expanded treatment options and provided savings for the healthcare system                                                                                                                                                                                                                                                                                                                                                                         |                                                                                                                                                             |                                                                                                                               |                                                                                                                                                        |
| Danese et al. 2016 <sup>23</sup> (Europe, countries not reported)                                               | Evolution on thinking about biosimilars one year after they had become available in the EU. Comparison to the survey published by Danese et al. 2014 <sup>24</sup><br><br>Web survey with 14 multiple-choice questions for members of European Crohn's and Colitis Organization in 2015 (n=118)                                                                                                                                                                                                                  | 56% judged that educational activities that they were exposed to was fair and adequate, while 16% found it unnecessary | N/A                                                                                                                                                                                                                                                                                                                                                                                                         | More information was hoped from 75% medical societies, 52% multispecialty safety registries, 47% health institutions and 26% guidelines                                                                                                                                                                                      | 29% totally confident, 18% very confident and 34% confident enough (5%, 8% and 26% in 2013) to prescribe a biosimilar<br><br>Main advantage: 92% (90% in 2013) cost-sparing. Main issue: 42% the lack of data from clinical trials for all indications<br><br>27% (67% in 2013) consider biosimilars have higher immunogenicity compared to the originator and 17% (43% in 2013) different action than the originator<br><br>51% (24% in 2013) thought biosimilar should be approved for all the indications of the originator                                                                                                                                                                                                                                                          | N/A                                                                                                                                                         | 44% (6% in 2013) would switch a patient with remission                                                                        | 89% (85% in 2013) disagreed with automatic substitution by a pharmacist<br><br>13% support substitution for new prescriptions and 13% for all patients |
| Danese et al. 2014 <sup>24</sup> (Europe, countries not reported)                                               | Awareness of and readiness to use biosimilars<br><br>Web survey of 15 questions for 1,000 randomly selected European Crohn's and Colitis Organization members in 2013 (n=307)                                                                                                                                                                                                                                                                                                                                    | N/A                                                                                                                    | 70% were aware that biosimilar is a similar copy, but not equal to the originator, 19% responded that it is a copy of biological agent, identical to the originator, like a generic                                                                                                                                                                                                                         | Preferred information: 81% multi-specialty international safety registries to monitor safety and effectiveness, 78% health institutions on the development of rules on the use of biosimilars, 66% medical societies, 61% data regarding the registration process for biosimilars and 57% multispecialty practice guidelines | 6% thought that the originator and biosimilar were interchangeable<br><br>The main advantage: cost-sparing (89%). The main issue: different immunogenicity pattern than the originator (67%)<br><br>50% agreed biosimilars can significantly reduce healthcare costs, 27% expected them only having a marginal impact, 6% expected additional costs of introduction, regulation and pharmacovigilance to offset any potential savings<br><br>24% agreed that the tested biosimilar could be approved for all indications of the originator in terms of safety and efficacy, 19% for all rheumatologic indications, 14% for the specific indication only, 3% stated that all biosimilars could be approved for all indications of the originator and 39% disagreed with all of the above | 61% felt little or no confident in using biosimilars in their everyday clinical practice, 26% confident enough, 8% very confident, and 5% totally confident | 28% would consider replacing originator with a biosimilar                                                                     | 64% against the substitution by pharmacist<br><br>18% would agree only for new patients                                                                |
| Farhat et al. 2016 <sup>27</sup> (Algeria, Belgium, Egypt, Iran, Iraq, Italy, Jordan, Lebanon, Sudan and Syria) | Parameters on the acceptance and future prescription of biosimilars and worldwide situation focusing mainly on the EU and US laws, regulations and legislative pathways, pricing and challenging market access<br><br>Survey for over 150 healthcare professional in the conference meeting in 2015 (n=117 health care professionals responded, of which most were physicians; exact number of physicians who responded not reported). Other stakeholders apart from physicians are not addressed in this review | N/A                                                                                                                    | 66% knew what biosimilars were, 12% did not know and 22% had not answered the question. Of those who knew (66%), 62% considered biosimilars bioequivalent to originator and have all preclinical and clinical trials equal to the originator<br><br>63% agreed that biosimilars are already marketed in the Arab and Middle Eastern markets, while 45% agreed that they are manufactured in the same region | N/A                                                                                                                                                                                                                                                                                                                          | Drivers for prescribing: 69% FDA or EMA approval, 65% lower price of bioequivalence in comparison to the originator, 48% bio-efficacy, 42% safety and 31% good manufacturing practices and high reputation of the manufacturer. 5% think biosimilars don't have advantages<br><br>35% considered the cost of treatment should not overcome its effectiveness or safety/tolerance<br><br>26% thought lower prices were good news as patients will be treated with biologics<br><br>27% consider biosimilars would bring cost savings<br><br>49% trust companies highly experienced in manufacturing small-molecule generic drugs and 55% companies with prior experience in manufacturing biologics as biosimilar producers                                                              | 41% prescribe biosimilars while 33% don't (note that respondents were also other than physicians)                                                           | N/A                                                                                                                           | N/A                                                                                                                                                    |
| Felix et al. 2014 <sup>31</sup> (USA)                                                                           | Challenges and opportunities of market uptake of biosimilars from the perspectives of physicians and payers<br><br>Survey for physicians that had written about or were familiar with biosimilars based on literature                                                                                                                                                                                                                                                                                            | N/A                                                                                                                    | N/A                                                                                                                                                                                                                                                                                                                                                                                                         | N/A                                                                                                                                                                                                                                                                                                                          | Almost all physicians (n not reported) believed that if biosimilar was approved by FDA it will perform similarly to the originator with regard to safety and efficacy<br><br>Influences of decision making: efficacy and safety, out-of-pocket costs to the patient, price of treatment and immunogenicity                                                                                                                                                                                                                                                                                                                                                                                                                                                                              | Four physicians are somewhat likely, six very likely and three not likely to prescribe a biosimilar to a new patient                                        | 31%/61% (n not reported) say they are somewhat likely/very likely to switch an existing patient from originator to biosimilar | N/A                                                                                                                                                    |

|                                                                               |                                                                                                                                                                                                                                                                                                                                                                  |                                                                                                                                                                                                                                                                                                                            |                                                                                                                                                                                                                                                             |                                                                                                                                                                                                              |                                                                                                                                                                                                                                                                                                                                                                                                                                                                                                                                                                                                                                                                                                                                                        |                                                                                                                                                                                                                                                                                                                                                                                                                                                                                                                                                                                                                                                                                     |                                                                                                                                                                                                                                                                                                  |                                                                                                                                                                                                                                                                                                                        |
|-------------------------------------------------------------------------------|------------------------------------------------------------------------------------------------------------------------------------------------------------------------------------------------------------------------------------------------------------------------------------------------------------------------------------------------------------------|----------------------------------------------------------------------------------------------------------------------------------------------------------------------------------------------------------------------------------------------------------------------------------------------------------------------------|-------------------------------------------------------------------------------------------------------------------------------------------------------------------------------------------------------------------------------------------------------------|--------------------------------------------------------------------------------------------------------------------------------------------------------------------------------------------------------------|--------------------------------------------------------------------------------------------------------------------------------------------------------------------------------------------------------------------------------------------------------------------------------------------------------------------------------------------------------------------------------------------------------------------------------------------------------------------------------------------------------------------------------------------------------------------------------------------------------------------------------------------------------------------------------------------------------------------------------------------------------|-------------------------------------------------------------------------------------------------------------------------------------------------------------------------------------------------------------------------------------------------------------------------------------------------------------------------------------------------------------------------------------------------------------------------------------------------------------------------------------------------------------------------------------------------------------------------------------------------------------------------------------------------------------------------------------|--------------------------------------------------------------------------------------------------------------------------------------------------------------------------------------------------------------------------------------------------------------------------------------------------|------------------------------------------------------------------------------------------------------------------------------------------------------------------------------------------------------------------------------------------------------------------------------------------------------------------------|
|                                                                               | review of Medline-indexed publications (n=14). Other stakeholders apart from physicians are not addressed in this review                                                                                                                                                                                                                                         |                                                                                                                                                                                                                                                                                                                            |                                                                                                                                                                                                                                                             |                                                                                                                                                                                                              | 50% (n not reported) consider it is very important that there are proven chemical and pharmacokinetic similarities between originators and biosimilars<br><br>Roughly half (n not reported) consider payer and cost considerations very important                                                                                                                                                                                                                                                                                                                                                                                                                                                                                                      |                                                                                                                                                                                                                                                                                                                                                                                                                                                                                                                                                                                                                                                                                     |                                                                                                                                                                                                                                                                                                  |                                                                                                                                                                                                                                                                                                                        |
| Gewanter & Reilly 2014 <sup>36</sup> (Argentina, Brazil, Colombia and Mexico) | Understanding of biosimilars, how they use them and their concerns for the future<br><br>Web-based survey for 6650 prescribers from global market research panel (n=399)                                                                                                                                                                                         | 35% did not consider themselves familiar with biosimilars, meaning they could not define them or had never heard of them                                                                                                                                                                                                   | 49% were aware of differences between biologicals, biosimilars and non-comparable biologicals. 30% were unaware that clinical trials for single indication lead to approval for multiple indications                                                        | 71% seminars and conferences, 55% self-study, 32% education from biosimilar companies, 18% clinical trial participation and 4% other means<br><br>37% would like to learn from pharmaceutical companies      | 88% prescribe biologicals                                                                                                                                                                                                                                                                                                                                                                                                                                                                                                                                                                                                                                                                                                                              | 50% said they believed if two biological medicines had the same non-proprietary scientific name, patient could receive either product and have the same result                                                                                                                                                                                                                                                                                                                                                                                                                                                                                                                      | 44% said they believed if two biological medicines had the same non-proprietary scientific name, patient could be safely switched during a course of treatment, and the patient would have the same result<br><br>64% would not be comfortable switching for cost reasons rather medical reasons | N/A                                                                                                                                                                                                                                                                                                                    |
| Grabowski et al. 2015 <sup>32</sup> (Canada)                                  | Gaps in knowledge and attitudes towards biosimilars of rheumatologists<br><br>Web-based survey of 29 questions for 369 members of Canadian Rheumatology Association in February 2014 (n=81)                                                                                                                                                                      | 31% indicated themselves being familiar or very familiar with biosimilars<br><br>Those with greater than 20 years of practice were significantly more likely to indicate themselves familiar or very familiar than those with 20 or less years of practice                                                                 | 66% considered biosimilars essentially same as generic drugs<br><br>38% were aware of Health Canada's guidance on clinical requirement for biosimilar approval                                                                                              | N/A                                                                                                                                                                                                          | 94% generally comfortable prescribing biologic medicines to their patients<br><br>31% comfortable prescribing biosimilars to their patients if biosimilar was currently available<br><br>29% declined until their colleagues recommend it<br><br>42% indicated a 30% price reduction, and a third a ≥50% price reduction being reasonable before payers mandated the use of biosimilars over brand name biologics<br><br>54% disagreed or strongly disagreed, 32% agreed or strongly agreed and 14% were neutral using biosimilars with extrapolated indications<br><br>49% not confident, 19% confident or very confident, and a third neutral on the long-term sustainability profile of the biosimilar with 30 weeks of head-to-head clinical trial | 59% consider offering biosimilars, if biosimilar demonstrates that it is comparable to the brand name drug<br><br>72% unlikely or very unlikely, 11% likely or very likely and 16% neutral to offer a biosimilar, when biologic-naïve patient is an ideal candidate, where cost is not an issue<br><br>Greater familiarity with established brand name drugs and uncertainty over the long-term safety of biosimilars were often cited among those unlikely or very unlikely offering biosimilars<br><br>54% did not typically prescribe a biosimilar, were likely or very likely to offer a biosimilar, when the provincial payer or insurance company mandated using a biosimilar | 7.5% consider switching, if biosimilar demonstrates that it is comparable to the brand name drug                                                                                                                                                                                                 | 88% concerned or very concerned if a pharmacist had the ability to substitute a biologic drug for a biosimilar without the physician's approval                                                                                                                                                                        |
| Hemington et al. 2017 <sup>35</sup> (New Zealand)                             | Perceptions and attitudes towards efficacy, safety and manufacturing of biosimilars, factors associated with positive attitudes, indication extrapolation and switching, and circumstances in which physicians would be reluctant to prescribe biosimilars<br><br>E-mail survey for 327 physicians in medical specialist society (n=110)                         | 76% reported being familiar and having basic understanding and 13% very familiar and complete understanding of biosimilars, 9% had heard of biosimilars, but could not define them, and 2% had never heard of biosimilars                                                                                                  | N/A                                                                                                                                                                                                                                                         | N/A                                                                                                                                                                                                          | 70% very or somewhat confident of the efficacy of biosimilars<br><br>Less than 20% had negative views<br><br>Situations when biosimilars were not prescribed: 32% lack of clinical data, 17% evidence of adverse effects or lack of efficacy, 15% patients do well with current treatment and 6% patients have complex medical history<br><br>47% very confident or somewhat confident, 32% not confident and the remainder undecided in indication extrapolation                                                                                                                                                                                                                                                                                      | 71% would prescribe biosimilars for all or some clinical conditions meeting the relevant criteria, 10% would do this for only few or no clinical situations                                                                                                                                                                                                                                                                                                                                                                                                                                                                                                                         | 51% confident and 28% not very confident or not at all confident to switch patients                                                                                                                                                                                                              | N/A                                                                                                                                                                                                                                                                                                                    |
| Leonard et al. 2019 <sup>33</sup> (Europe and USA)                            | Healthcare provider knowledge, perceptions, and prescribing behaviours of biosimilars and, need for clinician-directed biosimilar education<br><br>Systematic literature review in PubMed, Embase, and Cochrane Library databases from January 2014 to March 2018 (n=20 publications). Other stakeholders apart from physicians are not addressed in this review | Physicians often described having only little knowledge on biosimilars<br><br>The shares of described having a good knowledge were low. Those that described having a high level of familiarity with biosimilars, often incorrectly defined biosimilarity, reflecting the discrepancy between claimed and actual knowledge | Majority of physicians (in different studies that were included in the systematic review) had incomplete or basic understanding of biosimilars<br><br>Familiarity of biosimilars appeared greater in hospital-based clinicians than office-based clinicians | Self-study, peer-reviewed journals, professional guidelines, discussion with physician and pharmacist colleagues, manufacturer promotional material, educational programs and conference/ seminar attendance | Physicians were hesitant about the safety, efficacy and indication extrapolation of biosimilars. Safety concerns often related to immunogenicity and indication extrapolation concerns to the lack of clinical trials. Years of practice did not significantly effect on prescribing behaviour                                                                                                                                                                                                                                                                                                                                                                                                                                                         | Biosimilars were largely considered second-line therapies for biologic-naïve patients<br><br>Some physicians would limit the use of biosimilars to a small patient population first                                                                                                                                                                                                                                                                                                                                                                                                                                                                                                 | N/A                                                                                                                                                                                                                                                                                              | Physicians were mainly hesitant about pharmacy-driven substitution of biologic medicines<br><br>Some studies reported that physicians were unaware that interchangeability could enable pharmacist-led substitution<br><br>There were only some studies reporting positive attitudes towards pharmacy-led substitution |
| O'Callaghan et al. 2017 <sup>10</sup> (Ireland)                               | Medical specialists', general practitioners' and community pharmacists awareness of and attitudes to biosimilars                                                                                                                                                                                                                                                 | 44% of medical specialists and 5% of general practitioners very familiar with biosimilars, 41% and                                                                                                                                                                                                                         | 25% of medical specialists and 18% of general practitioners considered biosimilars                                                                                                                                                                          | Medical specialists (n=101, not all answered this question): 72% guidelines from professional societies,                                                                                                     | 59% of those aware of biosimilars in their therapeutic area (n=73) prescribed biosimilars, while 40% didn't<br><br>Concerns: 81% efficacy in extrapolated indications, 81% immunogenicity, 79% efficacy, 78% safety, 73% quality and 62% traceability                                                                                                                                                                                                                                                                                                                                                                                                                                                                                                  | 67% of medical specialists that prescribed biosimilars (n=43) would most likely prescribe a biosimilar for treatment initiation                                                                                                                                                                                                                                                                                                                                                                                                                                                                                                                                                     | 28% of medical specialists that prescribed biosimilars (n=43) would be likely to switch from originator to biosimilar                                                                                                                                                                            | <5% of medical specialists would consider pharmacist-led substitution appropriate                                                                                                                                                                                                                                      |

1  
2  
3  
4  
5  
6  
7  
8  
9  
10  
11  
12  
13  
14  
15  
16  
17  
18  
19  
20  
21  
22  
23  
24  
25  
26  
27  
28  
29  
30  
31  
32  
33  
34  
35  
36  
37  
38  
39  
40  
41  
42  
43  
44  
45  
46

|                                                                                              |                                                                                                                                                                                                                                                                                                                                                                                                                                    |                                                                                                                                                                                                                                                                                                                      |                                                                                                                                                                                                |                                                                                                                                                                                                                                                                                              |                                                                                                                                                                                                                                                                                                                                                                                                                                                                                                                                                                                                                                                                                                                                                                                                                                                                                                                                                                                                                                                                                                                 |                                                                                                                                                                                                               |                                                                                                                                                           |                                                                                                                                                                                                                                                                                                                                                                                                                 |
|----------------------------------------------------------------------------------------------|------------------------------------------------------------------------------------------------------------------------------------------------------------------------------------------------------------------------------------------------------------------------------------------------------------------------------------------------------------------------------------------------------------------------------------|----------------------------------------------------------------------------------------------------------------------------------------------------------------------------------------------------------------------------------------------------------------------------------------------------------------------|------------------------------------------------------------------------------------------------------------------------------------------------------------------------------------------------|----------------------------------------------------------------------------------------------------------------------------------------------------------------------------------------------------------------------------------------------------------------------------------------------|-----------------------------------------------------------------------------------------------------------------------------------------------------------------------------------------------------------------------------------------------------------------------------------------------------------------------------------------------------------------------------------------------------------------------------------------------------------------------------------------------------------------------------------------------------------------------------------------------------------------------------------------------------------------------------------------------------------------------------------------------------------------------------------------------------------------------------------------------------------------------------------------------------------------------------------------------------------------------------------------------------------------------------------------------------------------------------------------------------------------|---------------------------------------------------------------------------------------------------------------------------------------------------------------------------------------------------------------|-----------------------------------------------------------------------------------------------------------------------------------------------------------|-----------------------------------------------------------------------------------------------------------------------------------------------------------------------------------------------------------------------------------------------------------------------------------------------------------------------------------------------------------------------------------------------------------------|
|                                                                                              | E-mail-survey of 14-20 questions for 2917 physicians in national professional societies in 2016 (n=253 analysed answers from general practitioners and n=102 from medical specialists). Other stakeholders apart from physicians are not addressed in this review                                                                                                                                                                  | 35% familiar , and 6% and 25% had never heard the term "biosimilar"                                                                                                                                                                                                                                                  | the same as generic medicines<br><br>31% of medical specialists incorrectly agreed that biological medicines sharing the same international non-proprietary name were "structurally identical" | 68% published literature and 63% educational events<br><br>GPs (n=247, not all answered this question): 58% national or hospital formularies                                                                                                                                                 |                                                                                                                                                                                                                                                                                                                                                                                                                                                                                                                                                                                                                                                                                                                                                                                                                                                                                                                                                                                                                                                                                                                 |                                                                                                                                                                                                               |                                                                                                                                                           | 49% consider decisions should be taken by the prescriber on treatment initiation and 61% during treatment course. 43% consider decisions should be agreed with clinician in advance on treatment initiation and 35% during treatment course<br><br>84% think notifications for physician very important or critical in treatment initiation and 90% during treatment course                                     |
| O'Dolinar & Reilly 2014 <sup>25</sup> (France, Germany, Italy, Spain and the United Kingdom) | Nephrologists', rheumatologists', dermatologists', neurologists', endocrinologists' and oncologists' attitudes on biosimilar naming, substitution, and knowledge, sources of information and need for further education on biosimilars<br><br>Web-based 15-minutes short survey for 4,324 global physician market research panel of at the last quarter of 2013. 470 prescribers (20% of each five countries) completed the survey | 46% responded having basic understanding, 43% complete understanding, 11% could not define biosimilars and 1% had never heard of biosimilars<br><br>53% incorrectly thought biosimilar and originator were structurally identical and 37% incorrectly believed biosimilars are clinically tested for all indications | N/A                                                                                                                                                                                            | 47% conferences and seminars, 35% self-study, 11% studies sponsored by biosimilar companies and 6% equally studies sponsored by innovator companies, clinical trial participation and other routes                                                                                           | 48% said it was very important, 24% critically important, 23% somewhat important, 4% slightly important and 1% not important to have a sole authority to select the medicine                                                                                                                                                                                                                                                                                                                                                                                                                                                                                                                                                                                                                                                                                                                                                                                                                                                                                                                                    | 47% considered that products with the same non-proprietary name could be safely given to a patient with same results, 40% didn't think that way                                                               | 45% think patients can't be switched between the products with same non-proprietary names, 39% believed patients could be switched safely and effectively | 62% not acceptable, 35% acceptable and 3% totally acceptable on pharmacist-led substitution<br><br>47% very important, 30% critical, 6% slightly important and 1% not important to receive a notification if the pharmacist had dispensed other than prescribed biologic medicine during a repeated treatment                                                                                                   |
| van Overbeeke et al. 2017 <sup>28</sup> (Belgium)                                            | Knowledge and perceptions of patients and physicians with regard to originators and biosimilars and differences in perceptions and the factors influencing their preferences<br><br>Web survey of multiple-choice and open-ended questions for all 232 Belgian rheumatologists in 2016 (n=41 responded). Other stakeholders apart from physicians are not addressed in this review                                                 | 95% considered biosimilars are similar, but not identical                                                                                                                                                                                                                                                            | 90% were able to share the most complete definition of a biosimilar                                                                                                                            | N/A                                                                                                                                                                                                                                                                                          | 7% had prescribed biosimilars. 73% preferred the originator when the prices were equal and 38% when originator was more expensive. When prices were equal, none preferred biosimilar.<br><br>93% considered price, 63% safety, 61% quality and 61% efficacy as sources of differences between originators and biosimilars<br><br>33% considered biosimilars and originators interchangeable if biosimilarity is proven in the same indication and 38% if in indications where the medicine works via the same biological mechanism. 28% considered that biosimilars and originators were never interchangeable<br><br>56% think extrapolation could only be performed if efficacy and safety is proven to be similar in one of the indications and if the medicine works via the same mechanism in the other indications. 39% stated the indications should never be extrapolated<br><br>Positive influencers: clinical trials with positive results and clinical data in the respective indication. Negative influencers: less studied than the originator and no clinical trials in the respective indication | 8% would not prescribe a biosimilar and 60% would only prescribe a biosimilar to biologic-naïve patients.                                                                                                     | N/A                                                                                                                                                       | N/A                                                                                                                                                                                                                                                                                                                                                                                                             |
| Reilly & Murby 2017 <sup>34</sup> (Australia)                                                | Opinions on the naming of biologicals and biosimilars, how the use of these medicines is recorded and their views on substitution of, familiarity with, knowledge of, attitudes to and beliefs in biosimilars<br><br>Web-based survey for prescribers recruited from a global, commercial database of health care professional in 2016 (n=451, of which 160 completed the survey)                                                  | 21% considered themselves very familiar and having complete understanding of biosimilars, 73% basic understanding and 6% could not define them                                                                                                                                                                       | 50% thought biosimilars go through the same regulatory process as original biologics<br><br>70% knew biosimilars could be approved for all or for some indications of the originator           | 46% published literature, 28% colleagues, 27% information from Pharmaceutical Benefits Advisory Committee, 24% product information label, 19% information from Therapeutic Goods Administration, 18% sales representative, 13% hospital formulary<br><br>43% never used published literature | N/A                                                                                                                                                                                                                                                                                                                                                                                                                                                                                                                                                                                                                                                                                                                                                                                                                                                                                                                                                                                                                                                                                                             | 16% would be comfortable prescribing a biosimilar that was approved for several indications based on clinical trials in only one indication, 11% would not feel comfortable and 73% had some concerns on this | N/A                                                                                                                                                       | 54% very and 36% critically important to have sole authority to decide of which biological was dispensed<br><br>Evidence required for pharmacist-led substitution: 53% clinical trial data of no safety of efficacy risks in switching, 53% clinical trial data of no safety of efficacy risks after multiple switches, 27% in-market experience, 24% observational data and 6% no evidence would be sufficient |
| Sullivan et al. 2017 <sup>7</sup> (Germany)                                                  | Motivators of prescribing biosimilars, preferences matching actual prescribing behaviour and patient                                                                                                                                                                                                                                                                                                                               | N/A                                                                                                                                                                                                                                                                                                                  | N/A                                                                                                                                                                                            | N/A                                                                                                                                                                                                                                                                                          | Biosimilars account for 12-13% of all biologic therapies the respondents prescribe                                                                                                                                                                                                                                                                                                                                                                                                                                                                                                                                                                                                                                                                                                                                                                                                                                                                                                                                                                                                                              | 88% would prefer to prescribe originator to biosimilar as 1st line therapy                                                                                                                                    | N/A                                                                                                                                                       | N/A                                                                                                                                                                                                                                                                                                                                                                                                             |

|                                                  |                                                                                                                                                                                                                                                                                                                                                                                                                                                                                                                                                                                                                                                                                                                                                                                                                                                                        |     |     |     |                                                                                                                                                                                                                                                                                                                                                                                                                         |                                                                             |     |     |
|--------------------------------------------------|------------------------------------------------------------------------------------------------------------------------------------------------------------------------------------------------------------------------------------------------------------------------------------------------------------------------------------------------------------------------------------------------------------------------------------------------------------------------------------------------------------------------------------------------------------------------------------------------------------------------------------------------------------------------------------------------------------------------------------------------------------------------------------------------------------------------------------------------------------------------|-----|-----|-----|-------------------------------------------------------------------------------------------------------------------------------------------------------------------------------------------------------------------------------------------------------------------------------------------------------------------------------------------------------------------------------------------------------------------------|-----------------------------------------------------------------------------|-----|-----|
|                                                  | <p>acceptance, satisfaction and concerns on biosimilars and how these relate to the treatment with originators or biosimilars</p> <p>Real world, cross-sectional study (in which physicians filled a survey form and reported their prescribing, and recruited patients that also filled a questionnaire form to provide information on how reported prescribing was occurred in practice) in 2015-2016 (n=25). Other stakeholders apart from physicians are not addressed in this review</p> <p>Based on their response, 11 physicians were assigned to investigative (primarily concerned with symptom improvement and disease modification), 7 to conservative (primarily concerned with safety) and 7 to other (influenced primarily by other factors)</p>                                                                                                         |     |     |     | <p>Reasons to prescribe: desire to get experience with the new product (89% of investigative, 100% of conservative and 57% of other), being convinced of equivalent efficacy compared to originators (44%, 67% and 43%), lower cost (44%, 83% and 71%), believing that is economic prescribing (44%, 83% and 57%) and believing that using biosimilars makes savings which can be used elsewhere (22%, 67% and 29%)</p> |                                                                             |     |     |
| <p>Waller et al. 2017<sup>28</sup> (Germany)</p> | <p>Motivators of prescribing biosimilars, preferences matching actual prescribing behaviour, and patient acceptance, satisfaction and concerns on biosimilars and how these relate to the treatment with originators or biosimilars</p> <p>Real world, cross-sectional study (in which physicians filled a survey form and reported their prescribing, and recruited patients that also filled a questionnaire form to provide information on how reported prescribing was occurred in practice) in 2015-2016 (n=50). Other stakeholders apart from physicians are not addressed in this review</p> <p>Based on their response, 23 physicians were assigned to investigative (primarily concerned with symptom improvement and disease modification), 17 to conservative (primarily concerned with safety) and 10 to other (influenced primarily by other factors)</p> | N/A | N/A | N/A | <p>Biosimilars constitute less than 10% of the biologic therapies the respondents prescribed</p> <p>Reasons to prescribe: desire to get experience with the new product (86% of investigative, 65% of conservative and 50% of other), being convinced of equivalent efficacy compared to originators (64%, 65% and 50%) and lower costs (64%, 71% and 88%)</p>                                                          | >95% would prefer to prescribe originator to biosimilar as 1st line therapy | N/A | N/A |

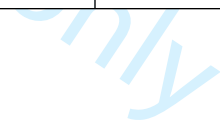

1  
2  
3 were collected between 2013 and 2017. Most of the 23 selected publications utilized surveys, typically web-based  
4 questionnaires with 11–22 questions, or fully structured short interviews (n=16)<sup>10, 16-17, 21-24, 25-26, 29-30, 32, 34-37</sup>. In  
5 addition there was a qualitative interview study<sup>18</sup> and real-world cross-sectional studies (n=2)<sup>27-28</sup>, in which  
6 physicians filled a survey form and reported their prescribing and after, recruited patients that also filled a  
7 questionnaire form to provide information on how reported prescribing actualized in practice. There were also  
8 discrete choice method surveys (n=2)<sup>19-20</sup>, in which prescribers were given a hypothetical scenario and possible  
9 treatment options, and they were asked to choose the alternative they prefer<sup>38</sup>. Furthermore, one systematic  
10 literature review on healthcare professionals' perceptions on biosimilars<sup>33</sup>, and one literature review with survey on  
11 the market uptake of biosimilars<sup>31</sup>, have been conducted.  
12  
13  
14

### 15 16 **Quality assessment**

17 Of 23 selected publications, nine<sup>10, 17, 19-20, 22, 26, 32-33, 35</sup> were evaluated to be high, five<sup>18, 21, 27-29</sup> to be moderate and  
18 nine<sup>16, 23-25, 30-31, 34, 36-37</sup> to be low in quality based on criteria used in this review (**Table 3**). Publications evaluated  
19 to be high in quality often included well-described and logically presented methods and results sections and a  
20 critical discussion section, of which those evaluated to be moderate or low quality typically lacked. In general, the  
21 quality assessment revealed that there is a lack of valid instruments and studies utilizing qualitative research  
22 methods.  
23  
24

### 25 26 **Self-rated and measured knowledge on biosimilars and sources of information (n=18)**

27 There is variation on the physicians' self-rated knowledge on biosimilars (**Table 2**). In individual studies, physicians  
28 consider they have at least a basic understanding of the topic: 5–44% of the physicians reported that they feel very  
29 familiar and 49–76% that they feel familiar with biosimilars<sup>10, 23, 25-26, 29, 32, 34-36</sup>. In these studies 2–25% of the  
30 physicians reported that they do not know what biosimilars are. In individual studies, physicians with more years of  
31 practice and those with specialisation consider themselves more familiar with biosimilars in comparison to less  
32 experienced colleagues and general practitioners<sup>10, 21, 32</sup>. On the contrary, a systematic literature review suggests  
33 that physicians often think that they only have little knowledge on the topic and that years of practice do not  
34 significantly effect on prescribing behaviour<sup>33</sup>.  
35  
36  
37

38 Although physicians self-rate that they generally feel familiar with biosimilars, the measured knowledge on the topic  
39 appears weaker (**Table 2**). 18–66% of the physicians incorrectly described biosimilars as generic medicines and  
40 31–72% as structurally identical to originator medicines<sup>10, 21-22, 24, 30, 32, 34, 36-37</sup>. However, in three studies, 76–100%  
41 of physicians were able to share the complete definition of a biosimilar correctly<sup>17-18, 26</sup>.  
42  
43

44 Physicians use several information sources on biologic medicines, such as scientific publications (25–84%), self-  
45 study (35–84%), pharmaceutical companies (32–76%), guidelines from professional societies (26–75%),  
46 educational events and conferences (17–71%), published literature (46–68%), physician colleagues (28–54%),  
47 safety registries (52%) and pharmacist colleagues (19%)<sup>10, 16, 18, 21, 23-25, 29-30, 33-34, 36</sup> (**Table 2**). According to a single  
48 study and a systematic literature review, information sources may vary according to the educational background of  
49 physicians, as the most common information source were the guidelines from professional societies for medical  
50 specialists and the national or hospital formularies for general practitioners<sup>10, 33</sup>.  
51  
52  
53

### 54 55 **Attitudes towards and experienced advantages and disadvantages of biosimilars (n=22)**

56 Reporting on the physicians' attitudes towards biosimilars seems contradictory<sup>10, 19-24, 26-32, 35-37</sup> (**Table 2**). Some  
57 studies show that 65–67% of physicians have concerns regarding biosimilars<sup>19-20</sup>, while others report that 54–94%  
58 of physicians feel somewhat or very confident prescribing biosimilars<sup>10, 21, 23, 32, 35</sup>. Regardless, positive attitude  
59 towards biosimilars does not automatically translate into prescribing, as physicians seem to prefer originator  
60

Table 3. Summary of the quality evaluation of the 23 publications selected for this systematic review.

| Reference                               | Main strengths                                                                                                                       | Main limitations                                                                                                                                                                                                                                                             | Quality according to the quality assessment protocol |
|-----------------------------------------|--------------------------------------------------------------------------------------------------------------------------------------|------------------------------------------------------------------------------------------------------------------------------------------------------------------------------------------------------------------------------------------------------------------------------|------------------------------------------------------|
| Aladul et al. 2019 <sup>17</sup>        | Results logically and clearly displayed                                                                                              | Details of the questionnaire form were not available, discussion on methodology partly lacking                                                                                                                                                                               | High                                                 |
| Baji et al. 2016a <sup>19</sup>         | Well-described and logically presented methodology, results and discussion                                                           | Ethical discussion lacking                                                                                                                                                                                                                                                   | High                                                 |
| Baji et al. 2016b <sup>20</sup>         | Well-described and logically presented methodology, results and discussion                                                           | Critical and ethical discussion partly lacking                                                                                                                                                                                                                               | High                                                 |
| Chapman et al. 2018 <sup>22</sup>       | Mainly well-described and logically presented methodology, results and discussion                                                    | More in-depth information could have been collected by a qualitative study                                                                                                                                                                                                   | High                                                 |
| Grabowski et al. 2015 <sup>32</sup>     | Well-described and logically presented methodology, results and discussion                                                           | More in-depth information could have been collected by a qualitative study                                                                                                                                                                                                   | High*                                                |
| Hemmington et al. 2017 <sup>35</sup>    | Well-described and logically presented methodology, results and discussion                                                           | Details of the questionnaire form were not available, more in-depth information could have been collected by a qualitative study                                                                                                                                             | High                                                 |
| Leonard et al. 2019 <sup>33</sup>       | Systematic approach with well-described methodology, results and discussion                                                          | Quality assessment of publications selected for systematic review is lacking, data not extracted study by study basis, no two reviewers in all steps of the systematic literature review process                                                                             | High                                                 |
| O'Callaghan et al. 2017 <sup>10</sup>   | Well-described and logically presented methodology, results and discussion                                                           | More in-depth information could have been collected by a qualitative study                                                                                                                                                                                                   | High                                                 |
| van Overbeeke et al. 2017 <sup>26</sup> | Well-described and logically presented methodology, results and discussion                                                           | More in-depth information could have been collected by a qualitative study                                                                                                                                                                                                   | High                                                 |
| Aladul et al. 2018 <sup>18</sup>        | Semi-structured interviews provide a more in-depth view on the perceptions of healthcare professional in comparison to short surveys | Exact numbers of respondents which certain opinion (n) not always reported, low number of representatives per each professional group                                                                                                                                        | Moderate*                                            |
| Barsell et al. 2017 <sup>29</sup>       | Well-presented results and discussion                                                                                                | Details of the questionnaire form were not available, description of methodology lacking, e.g. dropout not described, ethical discussion lacking                                                                                                                             | Moderate                                             |
| Beck et al. 2016 <sup>21</sup>          | Well-presented results and discussion                                                                                                | Details of the questionnaire form were not available, validity of the instrument unclear, as more in-depth information could have been collected by a qualitative study, dropout not described accurately                                                                    | Moderate*                                            |
| Sullivan et al. 2017 <sup>27</sup>      | Results clearly presented                                                                                                            | Dropout not described accurately, some inconsistencies in the presentation of methodology and discussion                                                                                                                                                                     | Moderate*                                            |
| Waller et al. 2017 <sup>28</sup>        | Well-presented results and discussion                                                                                                | Some inconsistencies in the presentation of methodology, e.g. sample selection and dropout                                                                                                                                                                                   | Moderate*                                            |
| Akhmetov et al. 2015 <sup>15</sup>      | Explicit aims                                                                                                                        | Clear presentation of results lacking, critical and ethical discussion lacking                                                                                                                                                                                               | Low                                                  |
| Cohen et al. 2016 <sup>30</sup>         | Mainly well-presented results and discussion                                                                                         | Details of the questionnaire form were not available, description of methodology lacking, ethical discussion lacking                                                                                                                                                         | Low                                                  |
| Danese et al. 2016 <sup>23</sup>        | Results clearly presented                                                                                                            | Details of the questionnaire form were not available, critical and ethical discussion partly lacking, description of methodology partly lacking                                                                                                                              | Low                                                  |
| Danese et al. 2014 <sup>24</sup>        | Results clearly presented                                                                                                            | Statistical analyses lacking, critical and ethical discussion lacking, description of methodology partly lacking, for example the number of invited members not mentioned                                                                                                    | Low                                                  |
| Farhat et al. 2016 <sup>37</sup>        | Mainly logically presented methodology                                                                                               | Aim is not explicitly presented, number of physicians who responded not reported, results presented in table format only, critical discussion lacking                                                                                                                        | Low*                                                 |
| Felix et al. 2014 <sup>31</sup>         | Explicit aims                                                                                                                        | Strategic sample selection, details of the questionnaire form were not available, exact numbers of respondents which certain opinion (n) not always reported, description of used statistical methods and data analysis lacking, inconsistency in the description of results | Low                                                  |
| Gewanter & Reilly 2014 <sup>36</sup>    | Explicit aims                                                                                                                        | Respondents from market research panel resulting that respondents work in disciplines in which don't necessarily involve biosimilars, such as psychiatry, description of used statistical methods and data analysis lacking, critical and ethical discussion lacking         | Low                                                  |
| O'Dolinar & Reilly 2014 <sup>25</sup>   | Explicit aims                                                                                                                        | Intentional sample selection, clear presentation of results lacking, critical and ethical discussion lacking                                                                                                                                                                 | Low                                                  |
| Reilly & Murby 2017 <sup>34</sup>       | Explicit aims                                                                                                                        | Description of data collection partly lacking, description of used statistical methods and data analysis lacking                                                                                                                                                             | Low                                                  |

\* Differences in opinions of which quality grade each publication was given, set in consensus

1  
2  
3 products to biosimilars<sup>19, 26, 32</sup>. Studies indicate that there might be differences in attitudes towards biosimilars  
4 between specialties: gastroenterologists seem frequent prescribers of biosimilars, while dermatologists and  
5 rheumatologists seem less enthusiastic<sup>18, 22, 30</sup>.

6  
7  
8 The main experienced advantages of biosimilars are cost savings<sup>17, 21-24, 29</sup>, lower price in comparison to the  
9 originator biologic medicine<sup>29, 37</sup> and physicians' willingness to try new treatments<sup>27-28</sup> (**Table 2**). Additionally, in  
10 single studies, robust pharmacovigilance studies<sup>17</sup>, easier access to treatment for patients<sup>29</sup>, and approval of the  
11 European Medicines Agency or the Food and Drug Administration<sup>37</sup> were reported as motivators for prescribing  
12 biosimilars. Most commonly reported disadvantages were distrust in safety<sup>10, 17, 21, 29, 31, 33</sup>, efficacy<sup>10, 17, 21, 29, 31, 33</sup>,  
13 immunogenicity<sup>10, 24, 29, 33</sup> and indication extrapolation of biosimilars<sup>10, 32-33</sup> or the lack of clinical data on biosimilars<sup>23,</sup>  
14 <sup>33, 35</sup>. Single studies also suggested the quality<sup>10</sup>, traceability<sup>10</sup> or tolerability<sup>21</sup> of biosimilars and patients' concerns  
15 towards biosimilars<sup>21</sup> as disadvantages.

### 16 17 18 19 **Initiation of biosimilars and switches between original biologic medicines and biosimilars (n=22)**

20 Physicians (39–89%) seem more eager to prescribe a biosimilar for biologic-naïve patients rather than patients  
21 already treated with biologic medicines<sup>10, 19, 22, 24, 26-29, 31-37</sup> (**Table 2**). In discrete choice experiment studies, for  
22 example, 61–84% of gastroenterologists chose biosimilar in at least one of the choice sets for biological-naïve  
23 patients<sup>19-20</sup>. However, there are also other factors affecting on the medicine selection, such as the cost of the  
24 medicines. It was reported, that if cost were not an issue, only 11% of physicians would choose biosimilar for  
25 treatment initiation<sup>32</sup>. Additionally, studies suggest that some personal characteristics may influence on the uptake  
26 of biosimilars by individual physicians. Men, senior consultants and those treating more patients<sup>20</sup>, along with those  
27 with greater familiarity with brand name medicines and uncertainty of long-term safety of biosimilars<sup>32</sup> were often  
28 unlikely to choose biosimilar as initial therapy. Within medical specialties, gastroenterologists (95% with no  
29 concerns) appear most confident on using biosimilars in treatment initiations, followed by rheumatologists (92%),  
30 dermatologists (79%) and diabetologists (75%)<sup>22</sup>.

31  
32  
33  
34  
35 Physicians seem less eager to switch an originator biologic medicine to a biosimilar<sup>10, 19-24, 30-32, 35-36</sup> (**Table 2**). The  
36 share of physicians that were willing to switch an originator to a biosimilar was 51 or below with the exception of a  
37 single study in which the percentage was 91%<sup>10, 21, 23-24, 30, 32, 35</sup>. Similarly to the treatment initiation, medical  
38 specialty of the individual physician may effect on the willingness to switch biologic medicines<sup>22</sup>.  
39 Gastroenterologists (95% with no concerns) seem most confident on switching, followed by dermatologists (78%),  
40 diabetologists (69%) and, notably, rheumatologists (53%).

### 41 42 43 44 **Pharmacist-led substitution of biologic medicines (n=10)**

45 Physicians (64–95%) are concerned about or disagree with pharmacist-led substitution of biologic medicines<sup>10, 18,</sup>  
46 <sup>21, 23-25, 29, 32-34</sup> (**Table 2**). Studies suggest that having a full autonomy on medicine selection and being fully aware  
47 of which medicine patient receives, was often crucial for physicians<sup>10, 25, 29, 34</sup>. However, according to a single study,  
48 88% of physicians believe that there will be a political change resulting to pharmacist-led substitution without  
49 consulting physicians in the future<sup>29</sup>.

## 50 51 52 53 **4 DISCUSSION**

54 According to this systematic review, physicians' knowledge on biosimilars varies widely. In general, measured  
55 knowledge appears weaker than self-assessed knowledge. Physicians use multiple information sources on biologic  
56 medicines, most commonly scientific publications, pharmaceutical companies and professional societies. Similarly  
57 to their knowledge, physicians' perceptions towards biosimilars and the uptake of these medicines also vary.  
58 Physicians seem to prefer originator products to biosimilars and prescribe biosimilars mainly for biologic-naïve  
59  
60

1  
2  
3 patients. Physicians consider cost savings and lower price in comparison to the originator biologic medicine as  
4 main advantages of biosimilars, while doubts often relate to safety, efficacy and immunogenicity of biosimilars.  
5 Most physicians have negative perceptions towards pharmacist-led substitution of biologic medicines.  
6

7  
8 This study addresses that physicians' knowledge on biosimilars appears inadequate. This may contribute to low  
9 prescribing and uptake of biosimilars<sup>10, 30, 33</sup>. Although this issue has been widely recognised, there is limited  
10 evidence on the effectiveness of education interventions on prescribing<sup>39</sup>. On the contrary, academic detailing has  
11 proven to be effective in steering prescribing<sup>40-41</sup>. Academic detailing is a method in which a trained educator meets  
12 with a healthcare professional and shares the latest evidence-based information on the topic that is educated<sup>42</sup>.  
13 Besides its' effectiveness in steering prescribing patterns, academic detailing has been proven to improve the cost-  
14 effectiveness of prescribing and reduce medical costs<sup>43-44</sup>. It is vital that in the near future physicians and other  
15 healthcare professionals are provided targeted, evidence-based information on biosimilars to support the uptake  
16 and to gain the full cost-saving potential of these medicines<sup>45-46</sup>. The information from medical societies is also vital  
17 in the distribution of appropriate biosimilar information<sup>11</sup>.  
18  
19  
20

21  
22 According to this study, physicians' attitudes towards biosimilars are contradictory and the prescribing of biosimilars  
23 is more often directed to biologic-naïve patients. This is despite of convincing evidence that supports switching<sup>47</sup>.  
24 Since prescribing decisions are either made by individual physicians or they are steered by policies, it is evident  
25 that more binding policies and guidance on prescribing is needed<sup>10-11</sup>. Countries have implemented various means  
26 to enhance the uptake of biosimilars. For example in Denmark and Norway, hospital, regional or national tendering  
27 is in use, resulting in significant savings in the purchase of biologic medicines<sup>11, 48-49</sup>. Some countries have  
28 implemented incentives for healthcare professionals<sup>11</sup>. Prescription quotas that define the ratio of biosimilars of all  
29 prescribed biologic medicines, are in use in Germany and Sweden<sup>50</sup>, while gain-sharing agreements that enable  
30 using the savings from biosimilar uptake to be used in the benefit of the clinic or the organisation are used in  
31 Sweden and in the United Kingdom<sup>51-52</sup>. Pharmacist-led substitution of biologic medicines can also be seen as a  
32 potential mean to enhance the uptake of biosimilars<sup>11, 29</sup>. Pharmacist-led substitution is legislatively possible in  
33 France and in the United States, and for some biological medicines in Australia<sup>53-55</sup>. Furthermore, the  
34 implementation of pharmacist-led substitution is currently ongoing in some European countries<sup>45, 56</sup>. All these  
35 initiatives highlight that the issue of weak uptake of biosimilars has been acknowledged globally, and there is a  
36 need to discover sustainable means to enhance and stabilize the uptake<sup>11</sup>. What complicates the issue is that, for  
37 example in Europe, even though the biosimilarity between biologic medicines is stated by the European Medicines  
38 Agency, the decisions on the interchangeability and substitution are made at the national level. In order to support  
39 the uptake of biosimilars, educational measures for both healthcare professionals and patients, and national  
40 recommendations and policies for switching and substitution of biologic medicines are needed<sup>29, 45-46</sup>.  
41  
42  
43  
44  
45  
46

47  
48 To the authors' knowledge, systematic literature reviews on the physicians' perceptions towards the uptake of  
49 biosimilars have not been published prior to this review. However, the results of this study are concise with an  
50 earlier systematic review on healthcare professionals' perceptions on biosimilars<sup>33</sup>. In addition to the novel  
51 information provided by this study, main strengths of our review are that the literature search was conducted with  
52 the help of an experienced information specialist, and the quality evaluation of publications was conducted  
53 independently by two researchers in order to avoid bias<sup>57</sup>. Whereas one major limitation of this review was that  
54 the study-by-study data extraction was only done by one researcher. Furthermore, theses or reports by authorities  
55 that could have included research results were excluded from this study. In addition, any of the available protocols  
56 for quality assessment did not cover different types of study settings and the protocol used in this study was  
57 compiled from four separate protocols. One notable point is also that the data in the publications that were selected  
58 for this review were mainly collected in 2017 or before. The topic is very timely and perceptions towards the uptake  
59  
60



1  
2  
3 of biosimilars may change according to new research information and experience in using these medicines. Thus,  
4 there is a need to continue examining perceptions of physicians, particularly with qualitative research methods.  
5  
6  
7

## 8 **5 CONCLUSIONS**

9 This systematic literature review concludes that physicians' knowledge on and attitudes towards biosimilars vary.  
10 Although physicians have positive attitudes towards biosimilars, prescribing is limited, especially for patients that  
11 are already treated with biologic medicines. Perceptions towards the pharmacist-led substitution of biologic  
12 medicines are often negative. Education and national recommendations and policies for switching and substitution  
13 of biologic medicines are needed to support the uptake of biosimilars.  
14  
15  
16

## 17 **FUNDING**

18 This study is a part of a larger research project funded by the Social Insurance Institution of Finland (Kela), grant  
19 (31/26/2017). The funder had no role in the planning or conduction of this review.  
20  
21

## 22 **COMPETING INTERESTS**

23 Authors declare no competing interests.  
24  
25

## 26 **AUTHOR'S CONTRIBUTIONS**

27 KS, MM, JJ and KHA contributed to the conception or study design. KS and MM acted as principal investigators in  
28 the search and evaluation of the literature and in the quality assessment. KS drafted the manuscript. All authors  
29 participated in critical revision of the manuscript and approved the final version.  
30  
31

## 32 **PATIENT CONSENT**

33 Not required.  
34  
35

## 36 **ETHICAL CONSENT**

37 Not required.  
38  
39

## 40 **PATIENT AND PUBLIC INVOLVEMENT**

41 This research was done without patient involvement. Patients were not invited to comment on the study design  
42 and were not consulted to develop patient relevant outcomes or interpret the results. Patients were not invited to  
43 contribute to the writing or editing of this document for readability or accuracy.  
44  
45

## 46 **DATA SHARING STATEMENT**

47 All data relevant to the study are included in the article or uploaded as supplementary information.  
48  
49

## 50 **REFERENCES**

51 1 European Commission. Directive 2001/83/EC of the European Parliament and of the Council of 6 November  
52 2001 on the Community code relating to medicinal products for human use (2001).  
53

54 2 United States Food and Drug Administration. Biosimilar and Interchangeable Products. Updated 2018a.  
55 Accessed 27 Jun 2019:

56 [www.fda.gov/Drugs/DevelopmentApprovalProcess/HowDrugsareDevelopedandApproved/ApprovalApplications/T](http://www.fda.gov/Drugs/DevelopmentApprovalProcess/HowDrugsareDevelopedandApproved/ApprovalApplications/TherapeuticBiologicApplications/Biosimilars/ucm580419.htm)  
57 [herapeuticBiologicApplications/Biosimilars/ucm580419.htm](http://www.fda.gov/Drugs/DevelopmentApprovalProcess/HowDrugsareDevelopedandApproved/ApprovalApplications/TherapeuticBiologicApplications/Biosimilars/ucm580419.htm)  
58

59 3 McCamish M, Woollett G. Worldwide experience with biosimilar development. *MABs* 2011;3(2):209–17.  
60

- 1  
2  
3 4 European Medicines Agency. Biosimilar medicines: Overview. Updated 2018a. Accessed 27 Jun 2019:  
4 [www.ema.europa.eu/en/human-regulatory/overview/biosimilar-medicines](http://www.ema.europa.eu/en/human-regulatory/overview/biosimilar-medicines)  
5
- 6 5 QuintilesIMS. 2017 IMS Biosimilar report - The Impact of Biosimilar Competition in Europe. Updated 2017.  
7 Accessed 27 Jun 2019: <http://ec.europa.eu/DocsRoom/documents/23102>  
8
- 9 6 European Medicines Agency. Medicines search. Updated 2018b. Accessed 27 Jun 2019:  
10 [www.ema.europa.eu/en/medicines/field\\_ema\\_web\\_categories%253Aname\\_field/Human/ema\\_group\\_types/ema\\_medicine/field\\_ema\\_med\\_status/authorised-36/ema\\_medicine\\_types/field\\_ema\\_med\\_biosimilar/field\\_ema\\_web\\_categories%253Aname\\_field/Human/search\\_api\\_aggregation\\_ema\\_medicine\\_types/field\\_ema\\_med\\_biosimilar/ema\\_group\\_types/ema\\_medicine/field\\_ema\\_med\\_status/authorised-36?sort=ema\\_medicine\\_title&order=asc](http://www.ema.europa.eu/en/medicines/field_ema_web_categories%253Aname_field/Human/ema_group_types/ema_medicine/field_ema_med_status/authorised-36/ema_medicine_types/field_ema_med_biosimilar/field_ema_web_categories%253Aname_field/Human/search_api_aggregation_ema_medicine_types/field_ema_med_biosimilar/ema_group_types/ema_medicine/field_ema_med_status/authorised-36?sort=ema_medicine_title&order=asc)  
11  
12  
13  
14
- 15 7 United States Food and Drug Administration. Biosimilar Product Information. Updated 2018b. Accessed 27 Jun  
16 2019:  
17 [www.fda.gov/drugs/developmentapprovalprocess/howdrugsaredevelopedandapproved/approvalapplications/therapeuticbiologicapplications/biosimilars/ucm580432.htm](http://www.fda.gov/drugs/developmentapprovalprocess/howdrugsaredevelopedandapproved/approvalapplications/therapeuticbiologicapplications/biosimilars/ucm580432.htm)  
18  
19
- 20 8 Blackstone A, Fuhr JP. The Economics of Biosimilars. *Am Health Drug Benefits* 2013;6(8):469–78.  
21
- 22 9 European Commission. What you Need to Know about Biosimilar Medicinal Products. A Consensus  
23 Information Document. Updated 2013. Accessed 27 Jun 2019:  
24 <http://ec.europa.eu/DocsRoom/documents/8242/attachments/1/translations>  
25
- 26 10 O'Callaghan J, Bermingham M, Leonard M, et al. Assessing awareness and attitudes of healthcare  
27 professionals on the use of biosimilar medicines: A survey of physicians and pharmacists in Ireland. *Regul*  
28 *Toxicol Pharmacol* 2017;88:252–61.  
29
- 30 11 O'Callaghan J, Barry SP, Bermingham M, et al. Regulation of biosimilar medicines and current perspectives of  
31 interchangeability and policy. *Eur J Clin Pharmacol* 2019;75(1):1–11.  
32
- 33 12 Åkesson KM, Saveman B-I, Nilsson G. Health care consumers' experiences of information communication  
34 technology – A summary of literature. *Int J Med Inform* 2007;76:633–45.  
35
- 36 13 Tong A, Sainsbury P, Graig J. Consolidated criteria for reporting qualitative research (COREQ): a 32-item  
37 checklist for interviews and focus groups. *Int J Qual Health Care* 2007;19(6):349–57.  
38
- 39 14 Joanna Briggs Institute. Reviewers' manual 2014. Updated 2014. Accessed 27 Jun 2019:  
40 <http://joannabriggs.org/assets/docs/sumari/reviewersmanual-2014.pdf>  
41
- 42 15 Swedish Agency for Health Technology Assessment and Assessment of Social Services. Evaluation and  
43 synthesis of studies using qualitative methods of analysis. Updated 2016. Accessed 27 Jun 2019:  
44 [www.sbu.se/globalassets/ebm/metodbok/sbuhandbook\\_qualitativemethodsofanalysis.pdf](http://www.sbu.se/globalassets/ebm/metodbok/sbuhandbook_qualitativemethodsofanalysis.pdf)  
45
- 46 16 Akhmetov I, Farista R, Thimmaraju PK. A Study to Assess the Awareness of the Biosimilars among Ukrainian  
47 Physicians. *J Bioanal Biomed* 2015;7(2):66–9.  
48
- 49 17 Aladul MI, Fitzpatrick RW, Chapman SR. Differences in UK healthcare professionals' knowledge, attitude and  
50 practice towards infliximab and insulin glargine biosimilars. *Int J Pharm Pract* 2019;27(2):214–7.  
51
- 52 18 Aladul MI, Fitzpatrick RW, Chapman SR. Healthcare professionals' perceptions and perspectives on biosimilar  
53 medicines and the barriers and facilitators to their prescribing in UK: a qualitative study. *BMJ Open*  
54 2018;8:e023603.  
55
- 56 19 Baji P, Gulácsi L, Golovics PA, et al. Perceived Risks Contra Benefits of Using Biosimilar Drugs in Ulcerative  
57 Colitis: Discrete Choice Experiment among Gastroenterologists. *Value Health Reg Issues* 2016a;10C:85–90.  
58
- 59 20 Baji P, Gulácsi L, Lovász BD, et al. Treatment preferences of originator versus biosimilar drugs in Crohn's  
60 disease; discrete choice experiment among gastroenterologists. *Scand J Gastroenterol* 2016b;51:22–7.

- 1  
2  
3 21 Beck M, Michel B, Rybarzyck-Vigouret MC, et al. Rheumatologists' Perceptions of Biosimilar Medicines  
4 Prescription: Findings from a French Web-Based Survey. *BioDrugs* 2016;30:585–92.  
5  
6 22 Chapman SR, Fitzpatrick RW, Aladul MI. Knowledge, attitude and practice of healthcare professionals  
7 towards infliximab and insulin glargine biosimilars: result of a UK web-based survey. *BMJ Open* 2017;7:e016730.  
8  
9 23 Danese S, Fiorino G, Michetti P. Changes in Biosimilar Knowledge among European Crohn's Colitis  
10 Organization [ECCO] Members: An Updated Survey. *J Crohns Colitis* 2016;10(11):1362–5.  
11  
12 24 Danese S, Fiorino G, Michetti P. Viewpoint: Knowledge and viewpoints on biosimilar monoclonal antibodies  
13 among members of the European Crohn's and Colitis Organization. *J Crohns Colitis* 2014;8:1548–50.  
14  
15 25 O'Dolinar RO, Reilly MS. Biosimilars naming, label transparency and authority of choice - survey findings  
16 among European physicians. *GaBI J* 2014;3(2):58–62.  
17  
18 26 van der Overbeeke E, DE Beleyr B, de Hoon J, et al. Perception of Originator Biologics and Biosimilars: A  
19 survey among Belgian rheumatoid arthritis patients and rheumatologists. *BioDrugs* 2017;31:447–59.  
20  
21 27 Sullivan E, Piercy J, Waller J, et al. Assessing gastroenterologist and patient acceptance of biosimilars in  
22 ulcerative colitis and Crohn's disease across Germany. *PLoS One* 2017;14;12(4):e0175826.  
23  
24 28 Waller J, Sullivan E, Piercy J. Assessing physician and patient acceptance of infliximab biosimilars in  
25 rheumatoid arthritis, ankylosing spondyloarthritis and psoriatic arthritis across Germany. *Patient Prefer Adher*  
26 2017;11:519–30.  
27  
28 29 Barsell A, Rengifo-Pardo M, Ehrlich A. A Survey Assessment of US Dermatologists' Perception of Biosimilars.  
29 *J Drugs Dermatol* 2017;16(6):612–5.  
30  
31 30 Cohen H, Beydoun D, Chien D, et al. Awareness, Knowledge, and Perceptions of Biosimilars Among  
32 Specialty Physicians. *Adv Ther* 2016;33:2160–72.  
33  
34 31 Felix A, Gupta A, Choen JP, et al. Barriers to market uptake of biosimilars in the US. *GaBI J* 2014;3(3):108–  
35 15.  
36  
37 32 Grabowski D, Henderson B, Lam D, et al. Attitudes towards subsequent entry biologics/biosimilars: A survey  
38 of Canadian rheumatologists. *Clin Rheumatol* 2015;34:1427–33.  
39  
40 33 Leonard E, Wascovich M, Oskuei S, et al. Factors Affecting Health Care Provider Knowledge and Acceptance  
41 of Biosimilar Medicines: A Systematic Review. *J Manag Care Spec Pharm.* 2019;25(1):102–12.  
42  
43 34 Reilly MS, Murby SP. A survey of Australian prescribers' views on the naming and substitution of biologicals.  
44 *GaBI J* 2017;8(3):107–13.  
45  
46 35 Hemmington A, Dalbeth N, Jarrett P, et al. Medical specialists' attitudes to prescribing biosimilars.  
47 *Pharmacoepidemiol Drug Saf* 2017;26:570–7.  
48  
49 36 Gewanter HL, Reilly MS. Prescribing practices for biosimilars: questionnaire survey findings from physicians in  
50 Argentina, Brazil, Colombia and Mexico. *GaBI J* 2015;4(4):161–6.  
51  
52 37 Farhat F, Othman A, el Karak F, et al. Review and results of a survey about biosimilars prescription and  
53 challenges in the Middle East and North Africa region. *Springer Plus* 2016;5(2113):1–9.  
54  
55 38 de Bekker-Grob EW, Ryan M, Gerard K. Discrete choice experiments in health economics: a review of the  
56 literature. *HealthEcon* 2012; 21:145–72.  
57  
58 39 Sipilä R, Helin-Salmivaara A, Korhonen MJ, et al. Change in antihypertensive drug prescribing after guideline  
59 implementation: a controlled before and after study. *BMC Fam Pract* 2011;12(87):1–12.  
60  
61 40 Solomon DH, Van Houten L, Glynn RJ, et al. Academic detailing to improve use of broad-spectrum  
antibiotics at an academic medical center. *Arch Intern Med* 2001;161(15):1897–902.

- 1  
2  
3 41 O'Brien MA, Rogers S, Jamtvedt G, et al. Educational outreach visits: effects on professional practice and  
4 health care outcomes. *Cochrane Database Syst Rev* 2007;17(4):CD000409  
5  
6 42 National Resource Center for Academic Detailing. Introductory Guide to Academic Detailing. Updated 2017.  
7 Accessed 16 Jul 2019: [www.narcad.org/uploads/5/7/9/5/57955981/introductory\\_guide\\_to\\_ad.pdf](http://www.narcad.org/uploads/5/7/9/5/57955981/introductory_guide_to_ad.pdf)  
8  
9 43 Simon SR, Rodriguez HP, Majumdar SR, et al. Economic analysis of a randomized trial of academic detailing  
10 interventions to improve use of antihypertensive medications. *J Clin Hypertens (Greenwich)* 2007;9(1):15–20.  
11  
12 44 Patel B, Afghan S. Effects of an educational outreach campaign (IMPACT) on depression management  
13 delivered to general practitioners in one primary care trust. *Ment Health Fam Med* 2009;6(3):155–62.  
14  
15 45 Moorkens E, Vulto AG, Huys I, et al. Policies for biosimilar uptake in Europe: An overview. *PLoS One*  
16 2017;12(12):e0190147.  
17  
18 46 Cook JW, McGrath MK, Dixon MD, et al. Academic oncology clinicians' understanding of biosimilars and  
19 information needed before prescribing. *Ther Adv Med Oncol* 2019;6(11):1758835918818335.  
20  
21 47 Cohen HP, Blauvelt A, Rifkin RM, et al. Switching Reference Medicines to Biosimilars: A Systematic Literature  
22 Review of Clinical Outcomes. *Drugs* 2018;78(4):463–78.  
23  
24 48 Mack A. Norway, biosimilars in different funding system. What works? *GaBI J* 2015;4(2):90–2.  
25  
26 49 Lunddahl B. Pharmacovigilance on biologicals and biosimilars: a Danish perspective. *GaBI J* 2016;5(3):123–4.  
27  
28 50 Rémuzat C, Kapuśniak A, Caban A, et al. Supply-side and demand-side policies for biosimilars: an overview  
29 in 10 European member states. *J Mark Access Health Policy* 2017;5(1):1307315.  
30  
31 51 Underhill C. Biosimilars and IBD: a switch programme using CT-P13. *Clin Pharm* 2016;8(9):266–70.  
32  
33 52 Flodmark C-E, Lilja K, Woehling H, et al. Switching from originator to biosimilar human growth hormone using  
34 dialogue teamwork: single-center experience from Sweden. *Biol Ther* 2013;3(1):35–43.  
35  
36 53 Thimmaraju PK, Rakshambikai R, Farista R, et al. Legislations on biosimilar interchangeability in the US and  
37 EU – developments far from visibility. Updated 2018. Accessed 16 Jul 2019: [www.gabionline.net/Sponsored-Articles/Legislations-on-biosimilar-interchangeability-in-the-US-and-EU-developments-far-from-visibility](http://www.gabionline.net/Sponsored-Articles/Legislations-on-biosimilar-interchangeability-in-the-US-and-EU-developments-far-from-visibility)  
38  
39 54 Cauchi R. State laws and legislation related to biologics medications and substitution of biosimilars. Updated  
40 2018. Accessed 16 Jul 2019: [www.ncsl.org/research/health/state-laws-and-legislation-related-to-biologic-medications-and-substitution-of-biosimilars.aspx](http://www.ncsl.org/research/health/state-laws-and-legislation-related-to-biologic-medications-and-substitution-of-biosimilars.aspx)  
41  
42 55 Australian Government Department of Health. Biosimilar awareness initiative. Updated 2018. Accessed 16 Jul  
43 2019: [www.health.gov.au/internet/main/publishing.nsf/Content/biosimilar-awareness-initiative](http://www.health.gov.au/internet/main/publishing.nsf/Content/biosimilar-awareness-initiative)  
44  
45 56 Larkin H, Macdonald J, Lumsden R. Pharmacy-mediated substitution of biosimilars – a global survey  
46 benchmarking country substitution policies. *GaBI J* 2017;6(4):157–64.  
47  
48 57 Singh S. How to Conduct and Interpret Systematic Reviews and Meta-Analyses. *Clin Transl Gastroenterol*  
49 2017;8(5):e93.  
50  
51  
52  
53  
54  
55  
56  
57  
58  
59  
60

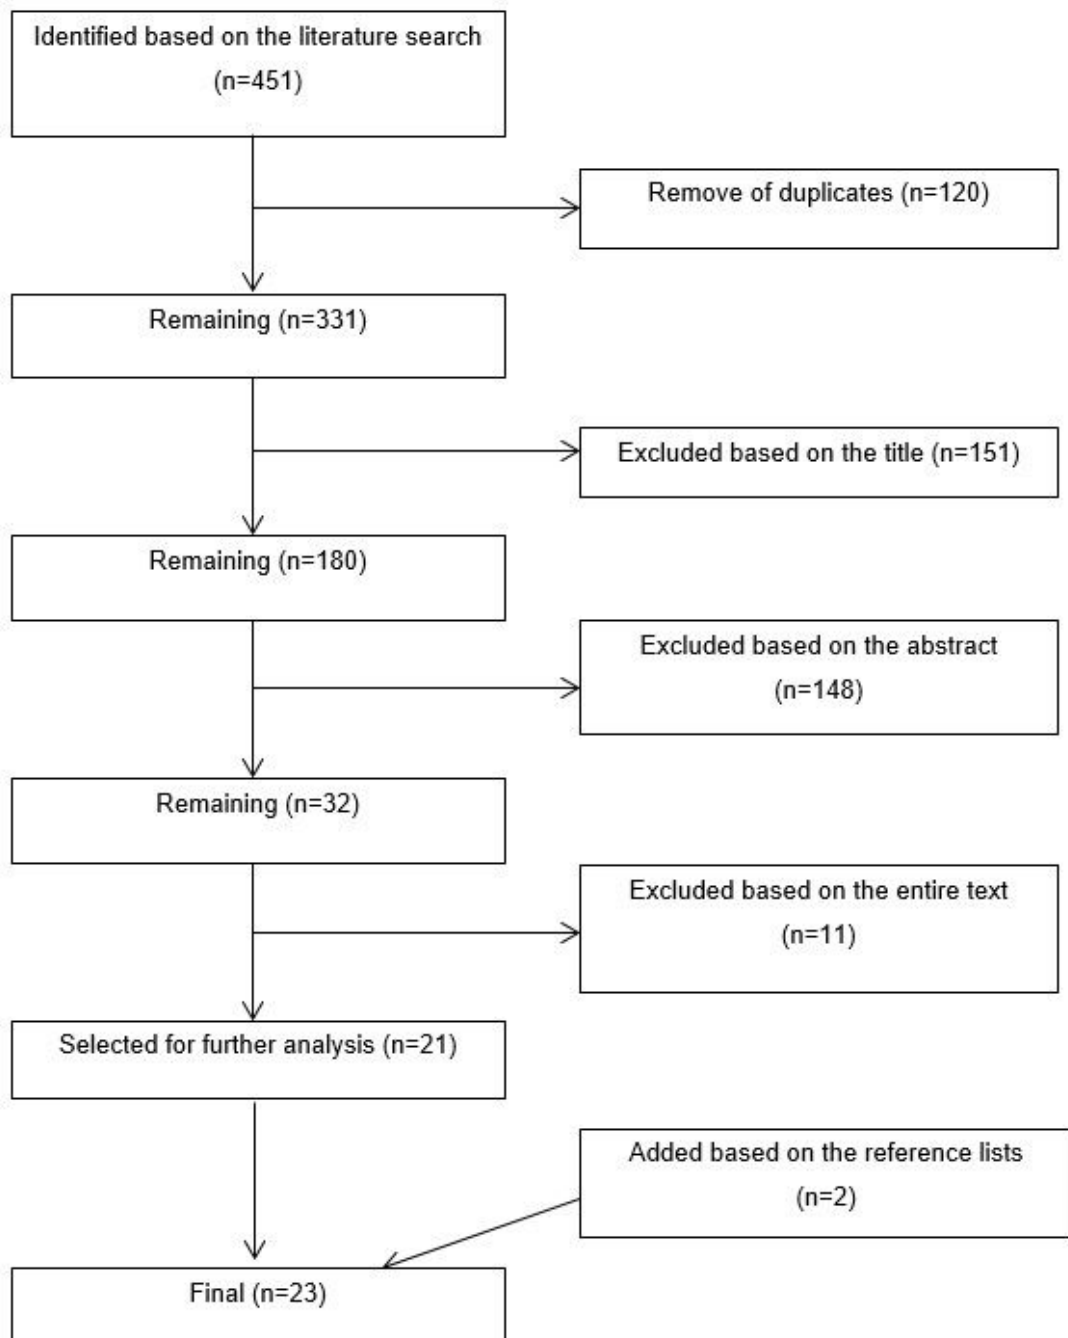

Figure 1. Flow chart on the review process.

## Appendix 1. Literature search approach.

| Database     | Search terms                                                                                                                                                                                                                                                                                                                                                                                                                                                                                                                                                                                                                                                                                                                                                                                                                                                                                                                                                                                                                                                                                                                                                                                                                                                                                                                                                                                                                                                                                                                                                                                                                 |
|--------------|------------------------------------------------------------------------------------------------------------------------------------------------------------------------------------------------------------------------------------------------------------------------------------------------------------------------------------------------------------------------------------------------------------------------------------------------------------------------------------------------------------------------------------------------------------------------------------------------------------------------------------------------------------------------------------------------------------------------------------------------------------------------------------------------------------------------------------------------------------------------------------------------------------------------------------------------------------------------------------------------------------------------------------------------------------------------------------------------------------------------------------------------------------------------------------------------------------------------------------------------------------------------------------------------------------------------------------------------------------------------------------------------------------------------------------------------------------------------------------------------------------------------------------------------------------------------------------------------------------------------------|
| MedLine Ovid | <p>(attitude* or stance* or opinion* or position* or orientat* or insight* or esteem* or estimat* or percepti* or belie* or decision* or decide* or determin* or prescrib* or chose* or choos* or choice* or guid* or recommend* or commission* or adopt* or accept* or uptak* best practice).mp AND (((physician.mp. or Physicians/) OR (clinician* or doctor* or specialist* or consultant*).mp.) AND (exp dermatology/ or exp internal medicine/ or exp endocrinology/ or exp gastroenterology/ or exp rheumatology/))</p> <p>OR (exp general practice/ or exp family practice/ or exp general practitioners/ or exp hospitalists/ or exp physicians, family/ or exp physicians, primary care/or physician.mp. or Physicians/ or (clinician* or doctor* or specialist* or consultant*).mp.) AND (exp DIABETES MELLITUS/ or diabetes.mp.)) AND (exp Biosimilar Pharmaceuticals/ or biosimilar*.mp.)</p> <p>(attitude* or stance* or opinion* or position* or orientat* or insight* or esteem* or estimat* or percepti* or belie* or decision* or decide* or determin* or prescrib* or chose* or choos* or choice* or guid* or recommend* or commission* or adopt* or accept* or uptak* best practice).mp AND (((Physicians/ or (physician* or clinician* or doctor* or specialist* or consultant*).mp.) AND (exp Biosimilar Pharmaceuticals/ or biosimilar*.mp.)</p>                                                                                                                                                                                                                                                       |
| Scopus       | <p>TITLE-ABS-KEY ( biosimilar* AND ( ( ( physician* OR clinician* OR doctor* OR specialist* OR consultant* ) W/20 ( rheumatology OR gastroenterology OR endocrinology OR dermatology OR diabetes OR "internal medicine" ) ) OR ( rheumatologist* OR gastroenterologist* OR endocrinologist* OR dermatologist* OR hospitalist OR "General Practitioner*" OR physicians W/2 family ) ) AND ( attitude* OR stance* OR opinion* OR position* OR orientat* OR insight* OR esteem* OR estimat* OR percepti* OR belie* OR decision* OR decide* OR determin* OR prescrib* OR choice* OR choos* OR chose* OR "best practice" OR guid* OR guide* OR recommend* OR commission* OR adopt* OR accept* OR uptak* ) ) AND ( LIMIT-TO ( SRCTYPE , "j " ) OR LIMIT-TO ( SRCTYPE , "p " ) ) AND ( LIMIT-TO ( DOCTYPE , "ar " ) OR LIMIT-TO ( DOCTYPE , "re " ) OR LIMIT-TO ( DOCTYPE , "cp " ) OR LIMIT-TO ( DOCTYPE , "ip " ) ) AND ( LIMIT-TO ( LANGUAGE , "English " ) )</p> <p>TITLE-ABS-KEY(biosimilar* AND ( physician* OR clinician* OR doctor* OR specialist* OR consultant* ) AND (attitude* OR stance* OR opinion* OR position* OR orientat* OR insight* OR esteem* OR estimat* OR percepti* OR belie* OR decision* OR decide* OR determin* OR prescrib* OR choice* OR choos* OR chose* OR "best practice" OR guid* OR guide* OR recommend* OR commission* OR adopt* OR accept* OR uptak*)) AND ( LIMIT-TO ( SRCTYPE,"j " ) OR LIMIT-TO ( SRCTYPE,"p " ) ) AND ( LIMIT-TO ( DOCTYPE,"ar " ) OR LIMIT-TO ( DOCTYPE,"re " ) OR LIMIT-TO ( DOCTYPE,"cp " ) OR LIMIT-TO ( DOCTYPE,"ip " ) ) AND ( LIMIT-TO ( LANGUAGE,"English " ) )</p> |

## Appendix 2. Quality assessment protocol.

Date:

Evaluator:

Authors:

Title:

| Design                                                  | Yes |
|---------------------------------------------------------|-----|
| Meta-analysis                                           |     |
| Randomized controlled trial                             |     |
| Systematic review                                       |     |
| Quantitative study: type (survey, pilot, other)         |     |
| Qualitative study: type (interview, focus group, other) |     |
| Other, what?                                            |     |

|                                                                                                        | Yes (1p) | Partly (½p) | No (0p) | Notes |
|--------------------------------------------------------------------------------------------------------|----------|-------------|---------|-------|
| <b>Aim and context</b>                                                                                 |          |             |         |       |
| 1 Is there an explicit aim?                                                                            |          |             |         |       |
| 2 Is the context described?                                                                            |          |             |         |       |
| <b>Methodology</b>                                                                                     |          |             |         |       |
| 3 Is the data collection described accurately and is it repeatable?                                    |          |             |         |       |
| 4 Is the sample selection preventative/relevant/not strategic (sample selected intentionally)?         |          |             |         |       |
| 5 Is the dropout described?                                                                            |          |             |         |       |
| 6 Is the data analysis described accurately and is it repeatable?                                      |          |             |         |       |
| 7 Are the (statistical or other) methods adequate and applicable in relation to the aims of the study? |          |             |         |       |
| <b>Results</b>                                                                                         |          |             |         |       |
| 8 Are the findings logic, reliable and clearly displayed?                                              |          |             |         |       |
| <b>Discussion and conclusions</b>                                                                      |          |             |         |       |
| 9 Is there a critical discussion on the findings?                                                      |          |             |         |       |
| 10 Is there a critical discussion on the method?                                                       |          |             |         |       |
| 11 Is there a new value?                                                                               |          |             |         |       |
| 12 Are the aims of the study met in the results and findings of the study?                             |          |             |         |       |
| 13 Are the instruments valid?                                                                          |          |             |         |       |
| 14 Are the instruments reliable?                                                                       |          |             |         |       |
| <b>Ethics</b>                                                                                          |          |             |         |       |
| 15 Is there an ethical discussion?                                                                     |          |             |         |       |
| 16 Are the authors non-dependable and free of any conflicts of interest?                               |          |             |         |       |
| 17 Did the participants participate without receiving a fee?                                           |          |             |         |       |
| <b>TOTAL POINTS</b>                                                                                    |          |             |         |       |

Quality assessment (rounded upwards when necessary): high:  $\geq 15$  yes, moderate: 12-14.5 yes, low:  $< 12$  yes

Quality assessment protocol adapted from the protocols of Åkesson et al. (2006), Tong et al. (2007), Joanna Briggs Institute (2014) and Swedish Agency for Health Technology Assessment and Assessment of Social Services (2016).

## PRISMA-P 2015 Checklist

This checklist has been adapted for use with protocol submissions to *Systematic Reviews* from Table 3 in Moher D et al: Preferred reporting items for systematic review and meta-analysis protocols (PRISMA-P) 2015 statement. *Systematic Reviews* 2015 4:1

| Section/topic                     | #  | Checklist item                                                                                                                                                                                  | Information reported                |                                     | Section                          |
|-----------------------------------|----|-------------------------------------------------------------------------------------------------------------------------------------------------------------------------------------------------|-------------------------------------|-------------------------------------|----------------------------------|
|                                   |    |                                                                                                                                                                                                 | Yes                                 | No                                  |                                  |
| <b>ADMINISTRATIVE INFORMATION</b> |    |                                                                                                                                                                                                 |                                     |                                     |                                  |
| <b>Title</b>                      |    |                                                                                                                                                                                                 |                                     |                                     |                                  |
| Identification                    | 1a | Identify the report as a protocol of a systematic review                                                                                                                                        | <input checked="" type="checkbox"/> | <input type="checkbox"/>            | Abstract, material and methods   |
| Update                            | 1b | If the protocol is for an update of a previous systematic review, identify as such                                                                                                              | <input type="checkbox"/>            | <input checked="" type="checkbox"/> |                                  |
| <b>Registration</b>               | 2  | If registered, provide the name of the registry (e.g., PROSPERO) and registration number in the Abstract                                                                                        | <input type="checkbox"/>            | <input checked="" type="checkbox"/> |                                  |
| <b>Authors</b>                    |    |                                                                                                                                                                                                 |                                     |                                     |                                  |
| Contact                           | 3a | Provide name, institutional affiliation, and e-mail address of all protocol authors; provide physical mailing address of corresponding author                                                   | <input checked="" type="checkbox"/> | <input type="checkbox"/>            | Affiliations section             |
| Contributions                     | 3b | Describe contributions of protocol authors and identify the guarantor of the review                                                                                                             | <input checked="" type="checkbox"/> | <input type="checkbox"/>            | Material and methods, Appendix 2 |
| <b>Amendments</b>                 | 4  | If the protocol represents an amendment of a previously completed or published protocol, identify as such and list changes; otherwise, state plan for documenting important protocol amendments | <input type="checkbox"/>            | <input checked="" type="checkbox"/> |                                  |
| <b>Support</b>                    |    |                                                                                                                                                                                                 |                                     |                                     |                                  |
| Sources                           | 5a | Indicate sources of financial or other support for the review                                                                                                                                   | <input checked="" type="checkbox"/> | <input type="checkbox"/>            | Funding section                  |
| Sponsor                           | 5b | Provide name for the review funder and/or sponsor                                                                                                                                               | <input checked="" type="checkbox"/> | <input type="checkbox"/>            | Funding section                  |
| Role of sponsor/funder            | 5c | Describe roles of funder(s), sponsor(s), and/or institution(s), if any, in developing the protocol                                                                                              | <input checked="" type="checkbox"/> | <input type="checkbox"/>            | Funding section                  |
| <b>INTRODUCTION</b>               |    |                                                                                                                                                                                                 |                                     |                                     |                                  |
| <b>Rationale</b>                  | 6  | Describe the rationale for the review in the context of what is already known                                                                                                                   | <input checked="" type="checkbox"/> | <input type="checkbox"/>            | Introduction                     |



| Section/topic                      | #   | Checklist item                                                                                                                                                                                                            | Information reported                |                                     | Section                                                                   |
|------------------------------------|-----|---------------------------------------------------------------------------------------------------------------------------------------------------------------------------------------------------------------------------|-------------------------------------|-------------------------------------|---------------------------------------------------------------------------|
|                                    |     |                                                                                                                                                                                                                           | Yes                                 | No                                  |                                                                           |
| Objectives                         | 7   | Provide an explicit statement of the question(s) the review will address with reference to participants, interventions, comparators, and outcomes (PICO)                                                                  | <input checked="" type="checkbox"/> | <input type="checkbox"/>            | Last chapter of the Introduction and Data extraction and analysis chapter |
| <b>METHODS</b>                     |     |                                                                                                                                                                                                                           |                                     |                                     |                                                                           |
| Eligibility criteria               | 8   | Specify the study characteristics (e.g., PICO, study design, setting, time frame) and report characteristics (e.g., years considered, language, publication status) to be used as criteria for eligibility for the review | <input checked="" type="checkbox"/> | <input type="checkbox"/>            | Table 1                                                                   |
| Information sources                | 9   | Describe all intended information sources (e.g., electronic databases, contact with study authors, trial registers, or other grey literature sources) with planned dates of coverage                                      | <input checked="" type="checkbox"/> | <input type="checkbox"/>            | Literature search section                                                 |
| Search strategy                    | 10  | Present draft of search strategy to be used for at least one electronic database, including planned limits, such that it could be repeated                                                                                | <input checked="" type="checkbox"/> | <input type="checkbox"/>            | Appendix 1                                                                |
| <b>STUDY RECORDS</b>               |     |                                                                                                                                                                                                                           |                                     |                                     |                                                                           |
| Data management                    | 11a | Describe the mechanism(s) that will be used to manage records and data throughout the review                                                                                                                              | <input checked="" type="checkbox"/> | <input type="checkbox"/>            | Material and methods                                                      |
| Selection process                  | 11b | State the process that will be used for selecting studies (e.g., two independent reviewers) through each phase of the review (i.e., screening, eligibility, and inclusion in meta-analysis)                               | <input checked="" type="checkbox"/> | <input type="checkbox"/>            | Material and methods                                                      |
| Data collection process            | 11c | Describe planned method of extracting data from reports (e.g., piloting forms, done independently, in duplicate), any processes for obtaining and confirming data from investigators                                      | <input checked="" type="checkbox"/> | <input type="checkbox"/>            | Material and methods                                                      |
| Data items                         | 12  | List and define all variables for which data will be sought (e.g., PICO items, funding sources), any pre-planned data assumptions and simplifications                                                                     | <input type="checkbox"/>            | <input checked="" type="checkbox"/> |                                                                           |
| Outcomes and prioritization        | 13  | List and define all outcomes for which data will be sought, including prioritization of main and additional outcomes, with rationale                                                                                      | <input checked="" type="checkbox"/> | <input type="checkbox"/>            | Material and methods, especially Quality assessment                       |
| Risk of bias in individual studies | 14  | Describe anticipated methods for assessing risk of bias of individual studies, including whether this will be done at the outcome or study level, or both; state how this information will be used in data synthesis      | <input checked="" type="checkbox"/> | <input type="checkbox"/>            | Material and methods, especially Quality assessment                       |
| <b>DATA</b>                        |     |                                                                                                                                                                                                                           |                                     |                                     |                                                                           |

| Section/topic                            | #   | Checklist item                                                                                                                                                                                                                              | Information reported                |                                     | Section                                           |
|------------------------------------------|-----|---------------------------------------------------------------------------------------------------------------------------------------------------------------------------------------------------------------------------------------------|-------------------------------------|-------------------------------------|---------------------------------------------------|
|                                          |     |                                                                                                                                                                                                                                             | Yes                                 | No                                  |                                                   |
| <b>Synthesis</b>                         | 15a | Describe criteria under which study data will be quantitatively synthesized                                                                                                                                                                 | <input checked="" type="checkbox"/> | <input type="checkbox"/>            | Tabulation, see Table 2                           |
|                                          | 15b | If data are appropriate for quantitative synthesis, describe planned summary measures, methods of handling data, and methods of combining data from studies, including any planned exploration of consistency (e.g., $I^2$ , Kendall's tau) | <input type="checkbox"/>            | <input checked="" type="checkbox"/> |                                                   |
|                                          | 15c | Describe any proposed additional analyses (e.g., sensitivity or subgroup analyses, meta-regression)                                                                                                                                         | <input type="checkbox"/>            | <input checked="" type="checkbox"/> |                                                   |
|                                          | 15d | If quantitative synthesis is not appropriate, describe the type of summary planned                                                                                                                                                          | <input checked="" type="checkbox"/> | <input type="checkbox"/>            | Tabulation, see Table 2, and Material and methods |
| <b>Meta-bias(es)</b>                     | 16  | Specify any planned assessment of meta-bias(es) (e.g., publication bias across studies, selective reporting within studies)                                                                                                                 | <input checked="" type="checkbox"/> | <input type="checkbox"/>            | Table 3                                           |
| <b>Confidence in cumulative evidence</b> | 17  | Describe how the strength of the body of evidence will be assessed (e.g., GRADE)                                                                                                                                                            | <input checked="" type="checkbox"/> | <input type="checkbox"/>            | Table 3, Material and methods                     |

# BMJ Open

## Physicians' perceptions on the uptake of biosimilars - A systematic review

|                                 |                                                                                                                                                                                                                                                                                                                                                                   |
|---------------------------------|-------------------------------------------------------------------------------------------------------------------------------------------------------------------------------------------------------------------------------------------------------------------------------------------------------------------------------------------------------------------|
| Journal:                        | <i>BMJ Open</i>                                                                                                                                                                                                                                                                                                                                                   |
| Manuscript ID                   | bmjopen-2019-034183.R1                                                                                                                                                                                                                                                                                                                                            |
| Article Type:                   | Original research                                                                                                                                                                                                                                                                                                                                                 |
| Date Submitted by the Author:   | 11-Dec-2019                                                                                                                                                                                                                                                                                                                                                       |
| Complete List of Authors:       | Sarnola, Kati; Finnish Medicines Agency Fimea, Assessment of Pharmacotherapies<br>Merikoski, Merja; City of Kuopio; Finnish Medicines Agency Fimea, Assessment of Pharmacotherapies<br>Jyrkka, Johanna; Finnish Medicines Agency FIMEA, Assessment of Pharmacotherapies<br>Hämeen-Anttila, Katri; Finnish Medicines Agency FIMEA, Assessment of Pharmacotherapies |
| <b>Primary Subject Heading</b>: | Health policy                                                                                                                                                                                                                                                                                                                                                     |
| Secondary Subject Heading:      | Health economics                                                                                                                                                                                                                                                                                                                                                  |
| Keywords:                       | biosimilar, biologic medicine, physician, perception                                                                                                                                                                                                                                                                                                              |
|                                 |                                                                                                                                                                                                                                                                                                                                                                   |

SCHOLARONE™  
Manuscripts



I, the Submitting Author has the right to grant and does grant on behalf of all authors of the Work (as defined in the below author licence), an exclusive licence and/or a non-exclusive licence for contributions from authors who are: i) UK Crown employees; ii) where BMJ has agreed a CC-BY licence shall apply, and/or iii) in accordance with the terms applicable for US Federal Government officers or employees acting as part of their official duties; on a worldwide, perpetual, irrevocable, royalty-free basis to BMJ Publishing Group Ltd ("BMJ") its licensees and where the relevant Journal is co-owned by BMJ to the co-owners of the Journal, to publish the Work in this journal and any other BMJ products and to exploit all rights, as set out in our [licence](#).

The Submitting Author accepts and understands that any supply made under these terms is made by BMJ to the Submitting Author unless you are acting as an employee on behalf of your employer or a postgraduate student of an affiliated institution which is paying any applicable article publishing charge ("APC") for Open Access articles. Where the Submitting Author wishes to make the Work available on an Open Access basis (and intends to pay the relevant APC), the terms of reuse of such Open Access shall be governed by a Creative Commons licence – details of these licences and which [Creative Commons](#) licence will apply to this Work are set out in our licence referred to above.

Other than as permitted in any relevant BMJ Author's Self Archiving Policies, I confirm this Work has not been accepted for publication elsewhere, is not being considered for publication elsewhere and does not duplicate material already published. I confirm all authors consent to publication of this Work and authorise the granting of this licence.

## Physicians' perceptions on the uptake of biosimilars - A systematic review

Kati Sarnola<sup>1\*</sup>, Merja Merikoski<sup>1,2</sup>, Johanna Jyrkkä<sup>1</sup>, Katri Hämeen-Anttila<sup>1</sup>

<sup>1</sup> Finnish Medicines Agency, P.O.Box 55, 000034 FIMEA, Finland

<sup>2</sup> City of Kuopio, Finland

\* Corresponding author: Kati Sarnola, kati.sarnola@fimea.fi, +358 29 522 35 24, ORCID: 0000-0003-1300-7482

### WORD COUNT

Word count (excluding title page, abstract, references, figures, tables and appendices): 3387

### ABSTRACT

**Objectives:** Examine physicians' perceptions on the uptake of biosimilars

**Design:** Systematic review

**Setting:** Literature search in MedLine Ovid and Scopus databases at the end of 2018. Search resulted to 451 studies and after removal of duplicates, to 331 studies. Two researchers examined studies based on the title, abstract and the entire text. Twenty-one scientific original studies written in English that addressed physicians' perceptions on the uptake of biosimilars were selected for further analysis. Additionally, the references of included studies were screened and two studies were handpicked and included in this review. Data of these 23 studies were extracted study-by-study basis. All publications were quality assessed by two researchers. In this review, higher emphasis was given to publications with high-assessed quality.

**Results:** Majority of selected studies were conducted in Europe and they commonly utilized short surveys. Physicians' familiarity of biosimilars varied: 49–76% were familiar with biosimilars and 2–25% did not know what biosimilars were, percentages varying from study to study. Measured knowledge appeared weaker compared to self-assessed knowledge. Physicians' perceptions towards biosimilars also varied: 54–94% were confident prescribing biosimilars, while 65–67% had concerns regarding these medicines. Physicians seem to prefer originator products to biosimilars and prescribe biosimilars mainly for biologic-naïve patients. Physicians consider cost savings and lower price in comparison to the originator biologic medicine as main advantages of biosimilars, while doubts often relate to safety, efficacy and immunogenicity. 64–95% of physicians have negative perceptions towards pharmacist-led substitution of biologic medicines.

**Conclusions:** Physicians' knowledge on and attitudes towards biosimilars vary. Although physicians had positive attitudes towards biosimilars, prescribing is limited, especially for patients that are already treated with biologic medicines. Perceptions towards the pharmacist-led substitution of biologic medicines are often negative. Education and national recommendations for switching and substitution of biologic medicines are needed to support the uptake of biosimilars.

### STRENGTHS AND LIMITATIONS OF THIS STUDY

- This is the first systematic review conducted solely on physicians' perceptions regarding the uptake of biosimilars
- The literature search was conducted with the help of an experienced information specialist
- Publications selected for this review were quality evaluated by two researchers independently
- The quality evaluation protocol was compiled from four existing evaluation protocols
- The data in the studies included in this review was mainly collected before

## KEYWORDS

biosimilar, biologic medicine, physician, perception, systematic review

## 1 INTRODUCTION

Biologic medicines consist of one or multiple biologic active substances and are often manufactured through biotechnology<sup>1-2</sup>. Biologic medicines were first developed mainly for rare diseases, but have thereafter improved the treatment of many common diseases, such as diabetes, arthritis and psoriasis<sup>1</sup>. The flipside of this transformation are high costs of biologic medicines that have contributed to increased medical costs globally<sup>3</sup>.

Biosimilars are biologic medicines highly similar to the originator biologic medicines with same standards on the quality, safety and efficacy of the products<sup>2-4</sup>. Biosimilars have no clinically meaningful differences to the existing reference product. Biosimilars are not regarded as generic medicines due to the complex manufacturing process and the natural variability between manufacturing batches of biologic medicines. The comparability of the product to the reference product has to be demonstrated, however, clinical trials are not required. As a result, biosimilars can be brought to the market at a lower cost in comparison to the originator biologic product. The uptake of biosimilars could lead to healthcare cost savings and better patient access to costly biologic therapies<sup>5</sup>. Until the end of 2018, 50 biosimilars have received marketing authorisation in Europe and 15 in the United States<sup>6-7</sup>.

Regardless of their demonstrated comparability and their cost-saving potential, biosimilars have not fully penetrated the market of biologic medicines. The European Union holds 80% of the global biosimilar market, but biosimilars constitute only 1% of total sales of biologic medicines<sup>8-9</sup>. It has been stated that the decisions to select biologic medicines may be either policy driven or made by individual physicians, which has raised a need to assess the prescribing of biosimilars in a critical manner<sup>10-11</sup>. Physicians' reluctance to prescribe biosimilars may restrain potential savings in medical costs that could enable offering biologic treatment to larger patient populations and providing more cost-effective treatment, as similar benefits could be gained by using less expensive treatments. Therefore, it is vital to study physicians' attitudes towards and perceptions on the uptake of biosimilars. This topic has not been reviewed systematically, and published information on the topic is somewhat contradictory. The aim of this systematic review was to examine physicians' perceptions on the uptake of biosimilars.

## 2 MATERIAL AND METHODS

### Literature search

A systematic literature search was conducted in MedLine Ovid and Scopus databases at the end of 2018. Selected databases provide a comprehensive selection of scientific publications from the disciplines of pharmacy and medicine. The systematic search strategy (**Appendix 1**) was constructed by the research group and the search was conducted by an experienced information specialist.

The initial search resulted in 451 studies. After removal of duplicates (n = 120), 331 studies remained. Studies were examined based on the title, abstract and the entire text by two researchers independently (KS and MM). Of the 331 studies, 151 were excluded based on the title, 148 based on the abstract and 11 based on the entire text. At each stage, researchers shared their views of the studies, discussed on possible differences on opinions and reached a consensus opinion based on the discussion. The inclusion and exclusion criteria of this systematic review are presented in **Table 1**. A total of 21 publications were selected for further analysis. Furthermore, the reference lists of these 21 articles were screened and two further articles that met the inclusion criteria were

handpicked and included in this review, which brings the final number of included studies being 23. The PRISMA flow chart explaining the study inclusion process is presented in **Figure 1**.

Table 1. Inclusion and exclusion criteria of studies of this systematic review.

| Inclusion criteria                                                                                                                                                                                                                                                                              | Exclusion criteria                                                                                                                                                                                                                                                                                           |
|-------------------------------------------------------------------------------------------------------------------------------------------------------------------------------------------------------------------------------------------------------------------------------------------------|--------------------------------------------------------------------------------------------------------------------------------------------------------------------------------------------------------------------------------------------------------------------------------------------------------------|
| <ul style="list-style-type: none"> <li>Original primary studies</li> </ul>                                                                                                                                                                                                                      | <ul style="list-style-type: none"> <li>Other than original primary studies, such as reviews, conference papers, consensus papers, commentaries and letters to editors</li> </ul>                                                                                                                             |
| <ul style="list-style-type: none"> <li>English language</li> </ul>                                                                                                                                                                                                                              | <ul style="list-style-type: none"> <li>Other language than English</li> </ul>                                                                                                                                                                                                                                |
| <ul style="list-style-type: none"> <li>Investigating physicians' perceptions on the uptake of biosimilars (physicians in particular or at least 45% of physicians among other healthcare professionals, although only physicians perceptions were taken into account in this review)</li> </ul> | <ul style="list-style-type: none"> <li>Investigating other healthcare professionals' perceptions on the uptake of biosimilars or publications with less than 45% of physicians of all participants involved or in which the physicians' perceptions are not separated in the results of the study</li> </ul> |
| <ul style="list-style-type: none"> <li>Publications on the physicians' perceptions on the automatic substitution of biologic medicines</li> </ul>                                                                                                                                               | <ul style="list-style-type: none"> <li>Publications on the physicians' perceptions on the automatic or generic substitution of other medicines than biologics</li> </ul>                                                                                                                                     |

### Quality assessment

Each of the 23 selected studies was concisely reviewed. Quality assessment was conducted according to a protocol adapted from the protocols of Åkesson et al. (2006), Tong et al. (2007), Joanna Briggs Institute (2014) and Swedish Agency for Health Technology Assessment and Assessment of Social Services (2016)<sup>12-15</sup> (**Appendix 2**). Adapted protocol was developed and used in the quality evaluation, because the study designs of the included studies varied and there was no single protocol that was suitable for evaluating the studies in a concise manner. Two researchers (KS and MM) conducted quality assessments individually and then compared their reviews. Differences in opinions (n = 6) were discussed and final evaluation was set in consensus. In the Results section of this systematic review, studies that were assessed as having high quality are emphasized in comparison to the results of those with moderate or low assessed quality.

### Data extraction and analysis

A meta-analysis was not conducted due to the various methods and both qualitative and quantitative approaches applied in the studies that were included in this review. The following information was extracted from all included studies: general information (authors, year of publication, and country of publication), aims, methods and results. In regards to results, seven topics for data extraction were identified based on the topics discussed in the publications and on the discussion in the research group. These topics were: physicians' 1) self-rated knowledge of biosimilars, 2) measured knowledge on biosimilars, 3) information sources of biologic medicines, 4) attitudes towards and experienced advantages and disadvantages of biosimilars, 5) actions in the initiation of biosimilars for biologic-naïve patients, 6) actions in the switches between originators and biosimilars for patients already treated with biologic medicines and 7) thoughts on pharmacist-led substitution of biologic medicines. In the Results section of this systematic review, these seven topics are presented within four broader themes: physicians' 1) self-rated and measured knowledge on biosimilars and information sources on biologic medicines, 2) attitudes towards and experienced advantages and disadvantages of biosimilars, 3) perceptions on the treatment initiations with biosimilars and on the switches between originator biologic medicines and biosimilars and 4) attitudes towards pharmacist-led substitution of biologic medicines. All percentages presented in the article refer to the percentages shown in the included studies of physicians with a certain opinion. If more than one study investigated the topic, a range of percentages in these studies are shown.

### 3 RESULTS

#### Study characteristics

Physicians' perceptions on biosimilars have been studied mainly in Europe (n = 15)<sup>10, 16-28</sup> and North America (n = 4)<sup>29-32</sup>. Single studies have been conducted in both Europe and North America (n = 1)<sup>33</sup>, Australia (n = 1)<sup>34</sup>, New Zealand (n = 1)<sup>35</sup>, Central and South America (n = 1)<sup>36</sup> and in multiple African, European and Middle Eastern countries (n = 1)<sup>37</sup> (**Table 2**). All studies were published between 2014 and 2019, but majority of them (n = 19)<sup>10, 16, 19-21, 23-32, 34-37</sup> in 2017 or before. With the exception of a single publication<sup>33</sup>, the data presented in the studies were collected between 2013 and 2017. Most of the 23 selected publications utilized surveys, typically web-based questionnaires with 11–22 questions, or fully structured short interviews (n = 16)<sup>10, 16-17, 21-24, 25-26, 29-30, 32, 34-37</sup>. In addition there was a qualitative interview study<sup>18</sup> and real-world cross-sectional studies (n = 2)<sup>27-28</sup>, in which physicians filled a survey form and reported their prescribing and after, recruited patients that also filled a questionnaire form to provide information on how reported prescribing actualized in practice. There were also discrete choice method surveys (n = 2)<sup>19-20</sup>, in which prescribers were given a hypothetical scenario and possible treatment options, and they were asked to choose the alternative they prefer<sup>38</sup>. Furthermore, one systematic literature review on healthcare professionals' perceptions on biosimilars<sup>33</sup>, and one literature review with survey on the market uptake of biosimilars<sup>31</sup>, have been conducted.

#### Quality assessment

Of 23 included studies, nine<sup>10, 17, 19-20, 22, 26, 32-33, 35</sup> were evaluated to be high, five<sup>18, 21, 27-29</sup> to be moderate and nine<sup>16, 23-25, 30-31, 34, 36-37</sup> to be low in quality based on criteria used in this review (**Table 3**). Publications evaluated to be high in quality often included well-described and logically presented methods and results sections and a critical discussion section, of which those evaluated to be moderate or low quality typically lacked. In general, the quality assessment revealed that there is a lack of valid instruments and studies utilizing qualitative research methods.

#### Self-rated and measured knowledge on biosimilars and sources of information (n = 18)

There is variation on the physicians' self-rated knowledge on biosimilars (**Table 2**). In individual studies, physicians consider they have at least a basic understanding of the topic: 5–44% of the physicians reported that they feel very familiar and 49–76% that they feel familiar with biosimilars<sup>10, 23, 25-26, 29, 32, 34-36</sup>. In these studies 2–25% of the physicians reported that they do not know what biosimilars are. In individual studies, physicians with more years of practice and those with specialisation consider themselves more familiar with biosimilars in comparison to less experienced colleagues and general practitioners<sup>10, 21, 32</sup>. On the contrary, a prior systematic literature review states that physicians often think that they only have little knowledge on the topic and that years of practice do not significantly affect prescribing behaviour<sup>33</sup>.

Although physicians self-rate that they generally feel familiar with biosimilars, the measured knowledge on the topic appears weaker (**Table 2**). 18–66% of the physicians incorrectly described biosimilars as generic medicines and 31–72% as structurally identical to originator medicines<sup>10, 21-22, 24, 30, 32, 34, 36-37</sup>. However, in three studies, 76–100% of physicians were able to share the complete definition of a biosimilar correctly<sup>17-18, 26</sup>.



Table 2. Characteristics of the 23 studies included in this systematic review.

| Reference (Country or region)                         | Aims and methods                                                                                                                                                                                                                                                                                                                                                                                                                               | Results                                                                                                                                                                                                              |                                                                                                                               |                                                                                                                                                                          |                                                                                                                                                                                                                                                                                                                                                                                                                                                                                                                                                                                                                                                                                                                                                                                                                                                                                                                                                                                                                                                             |                                                                                                                                                                                                                                                                                                                                                                                                                                                                                                |                                                                                                                                                                                                                                                                                                                                                                                                                                  |                                                                                                                                                                                                                      |
|-------------------------------------------------------|------------------------------------------------------------------------------------------------------------------------------------------------------------------------------------------------------------------------------------------------------------------------------------------------------------------------------------------------------------------------------------------------------------------------------------------------|----------------------------------------------------------------------------------------------------------------------------------------------------------------------------------------------------------------------|-------------------------------------------------------------------------------------------------------------------------------|--------------------------------------------------------------------------------------------------------------------------------------------------------------------------|-------------------------------------------------------------------------------------------------------------------------------------------------------------------------------------------------------------------------------------------------------------------------------------------------------------------------------------------------------------------------------------------------------------------------------------------------------------------------------------------------------------------------------------------------------------------------------------------------------------------------------------------------------------------------------------------------------------------------------------------------------------------------------------------------------------------------------------------------------------------------------------------------------------------------------------------------------------------------------------------------------------------------------------------------------------|------------------------------------------------------------------------------------------------------------------------------------------------------------------------------------------------------------------------------------------------------------------------------------------------------------------------------------------------------------------------------------------------------------------------------------------------------------------------------------------------|----------------------------------------------------------------------------------------------------------------------------------------------------------------------------------------------------------------------------------------------------------------------------------------------------------------------------------------------------------------------------------------------------------------------------------|----------------------------------------------------------------------------------------------------------------------------------------------------------------------------------------------------------------------|
|                                                       |                                                                                                                                                                                                                                                                                                                                                                                                                                                | Self-rated knowledge                                                                                                                                                                                                 | Measured knowledge                                                                                                            | Information sources                                                                                                                                                      | Attitudes towards and experienced advantages and disadvantages of biosimilars                                                                                                                                                                                                                                                                                                                                                                                                                                                                                                                                                                                                                                                                                                                                                                                                                                                                                                                                                                               | Initiation of biosimilars (biologic-naïve patients)                                                                                                                                                                                                                                                                                                                                                                                                                                            | Switches between originators and biosimilars (patients already treated with biologics)                                                                                                                                                                                                                                                                                                                                           | Pharmacist-led substitution of biologic medicines                                                                                                                                                                    |
| Akhmetov et al. 2015 <sup>16</sup> (Ukraine)          | Endocrinologists', oncologists', nephrologists', immunologists' and rheumatologists' awareness of biosimilars<br><br>Short interviews with eight close-ended questions, including 6 Likert-type items (n = 82), time of the study not reported                                                                                                                                                                                                 | Low to medium levels (not reported more specifically) of biosimilar awareness on a 1-5 scale, where 1=low and 5=high<br><br>Endocrinologists and nephrologists had higher levels of awareness than other respondents | N/A                                                                                                                           | Peer-reviewed journal articles (n = 35), internet (n = 31), medical conferences (n = 20), popular press (n = 9), key-opinion leaders (n = 3), drug manufacturers (n = 2) | On a 1-5 scale, likelihood of prescribing biosimilars: 68% average (specific numbers not reported), 23% below average and 9% above average<br><br>Majority (n not reported) are likely to try biosimilars in small batches, and then gradually move to larger groups of patients, endocrinologists and nephrologists showing the greatest interest<br><br>Facilitators of prescribing: 39% cost advantage, 22% certification of safety by EMA or FDA, 22% certification of efficacy by EMA or FDA, 10% propitiousness of the Cabinet of Ministers and 7% trust towards European, American and Japanese biotech companies as importers<br><br>Majority (n not reported) required 40-50% lower price for biosimilars than original biologics, endocrinologists typically accepting 20-30% discount in comparison to rheumatologists and oncologists that anticipated over 50% discount                                                                                                                                                                        | N/A                                                                                                                                                                                                                                                                                                                                                                                                                                                                                            | N/A                                                                                                                                                                                                                                                                                                                                                                                                                              | N/A                                                                                                                                                                                                                  |
| Aladul et al. 2019 <sup>17</sup> (the United Kingdom) | Knowledge and attitudes of healthcare professionals (n = 150 dermatologists, diabetologists, gastroenterologists and rheumatologists) towards infliximab and insulin glargine biosimilars<br><br>Web-based survey via selected medical associations between August 2016 and January 2017                                                                                                                                                       | 80% were aware that biosimilars were available on their local formulary                                                                                                                                              | 76% correctly considered biosimilars as copies of originators                                                                 | N/A                                                                                                                                                                      | 91% considered robust pharmacovigilance studies and 84% the costs as the most important influencer of their prescribing of biosimilars                                                                                                                                                                                                                                                                                                                                                                                                                                                                                                                                                                                                                                                                                                                                                                                                                                                                                                                      | 22% had major concerns on the efficacy and 14% on the safety of biosimilars that prevented them of starting a biosimilar                                                                                                                                                                                                                                                                                                                                                                       | 50% had major concerns on the efficacy and 34% on the safety of biosimilars in the switches                                                                                                                                                                                                                                                                                                                                      | N/A                                                                                                                                                                                                                  |
| Aladul et al. 2018 <sup>18</sup> (the United Kingdom) | Perceptions of consultants with specialities of diabetes mellitus, ulcerative colitis, Crohn's disease, rheumatoid arthritis, ankylosing spondylitis and psoriatic arthritis (n = 10) towards biosimilar infliximab, etanercept and insulin glargine and potential barriers and facilitators to their prescribing<br><br>Semi-structured interviews of purposive convenience sample of West Midlands hospital staff between June-November 2017 | N/A                                                                                                                                                                                                                  | All interviewees expressed an understanding of the concept of biosimilars and believed biosimilars were copies of originators | Conferences, pharmaceutical industry representatives, scientific journals and colleagues                                                                                 | Majority of rheumatologists and diabetologists (n not reported) would prescribe the reference product if the prices of the reference product and the biosimilar are equal<br><br>Gastroenterologists expressed more confidence and fewer concerns than other specialists, stating that indication extrapolation had previously been the major obstacle in the biosimilar uptake, but that it had been overcome<br><br>Majority of rheumatologists (n not reported) had concerns on indication extrapolation, considering their patients are very sensitive with higher multimorbid risks. Some rheumatologists (n not reported) openly declared being mistrustful on biosimilars<br><br>Facilitators of prescribing were information from societies, authorities and national registries. Barriers of prescribing were unexpected adverse effects or increase in side effects, patients' reluctance on using biosimilars, complicated, unsuitable or non-user-friendly administration device, unavailability of dose strengths in comparison to originators | Majority (n not reported) were content to initiate biosimilars<br><br>Minority of rheumatologists and diabetologists (n not reported) felt under pressure to initiate new patients with biosimilars by their organization<br><br>Two rheumatologists were happier to initiate biosimilars rather than switching                                                                                                                                                                                | All gastroenterologists (n = 7) and a minority of rheumatologists (n not reported) were content to switch patients from reference products to a biosimilar<br><br>All those that were content with switching considered that patients should be given the choice between the products<br><br>Majority of all physicians (n not reported) felt multiple switching based on cost reasons irrational                                | Majority (n not reported) has negative view on the pharmacist-led substitution of biologic medicines<br><br>Minority (n not reported) considered that automatic substitution would be accepted in the next few years |
| Baji et al. 2016a <sup>19</sup> (Hungary)             | Gastroenterologists' treatment preferences in ulcerative colitis<br><br>Discrete choice experiment survey (in which prescribers are given hypothetical scenario and possible treatment options, and they are asked to choose the alternative they prefer <sup>20</sup> ) in a Hungarian professional society meeting in 2014 (n = 51)                                                                                                          | N/A                                                                                                                                                                                                                  | N/A                                                                                                                           | N/A                                                                                                                                                                      | 20% had no concerns on biosimilars, 67% had some concerns on efficacy and/or safety and 12% did not support the use of biosimilars due to the lack of RCT evidence                                                                                                                                                                                                                                                                                                                                                                                                                                                                                                                                                                                                                                                                                                                                                                                                                                                                                          | 84% of all physicians and 80% of those who had some concerns (67%) chose biosimilar in at least one choice set<br><br>The most important attribute driving the choice: stopping rule (whether treatment after 12 months is reimbursed)<br><br>Estimated probability of choosing the originator over biosimilar in the present reimbursement situation: 48%. Probability of choosing the biosimilars with all the benefits offered over the originator in the present situation: 85% versus 15% | 61% of all and 53% of those who were concerned chose biosimilar in at least one of the choice sets<br><br>The most important attribute driving the choice: stopping rule<br><br>Estimated probability of choosing the originator over biosimilar in the present reimbursement situation: 71%. Probability of choosing the biosimilars with all the benefits offered over the originator in the present situation: 63% versus 37% | N/A                                                                                                                                                                                                                  |

|                                                        |                                                                                                                                                                                                                                                                                                                                                                                                                                                                                                                                               |                                                                                                                                                                                                                                                                                        |                                                                                                                                                                                                                                                                                                                                                                                                                                    |                                                                                                                                                           |                                                                                                                                                                                                                                                                                                                                                                                                                                                                                                                                                                                 |                                                                                                                                                                                                                                                                                                                                                                                                                                                                                                                |                                                                                                                                                                                                                                                                                                               |                                                                                                                                                                                                                                                                     |
|--------------------------------------------------------|-----------------------------------------------------------------------------------------------------------------------------------------------------------------------------------------------------------------------------------------------------------------------------------------------------------------------------------------------------------------------------------------------------------------------------------------------------------------------------------------------------------------------------------------------|----------------------------------------------------------------------------------------------------------------------------------------------------------------------------------------------------------------------------------------------------------------------------------------|------------------------------------------------------------------------------------------------------------------------------------------------------------------------------------------------------------------------------------------------------------------------------------------------------------------------------------------------------------------------------------------------------------------------------------|-----------------------------------------------------------------------------------------------------------------------------------------------------------|---------------------------------------------------------------------------------------------------------------------------------------------------------------------------------------------------------------------------------------------------------------------------------------------------------------------------------------------------------------------------------------------------------------------------------------------------------------------------------------------------------------------------------------------------------------------------------|----------------------------------------------------------------------------------------------------------------------------------------------------------------------------------------------------------------------------------------------------------------------------------------------------------------------------------------------------------------------------------------------------------------------------------------------------------------------------------------------------------------|---------------------------------------------------------------------------------------------------------------------------------------------------------------------------------------------------------------------------------------------------------------------------------------------------------------|---------------------------------------------------------------------------------------------------------------------------------------------------------------------------------------------------------------------------------------------------------------------|
| Baji et al. 2016b <sup>20</sup> (Hungary)              | Gastroenterologists' treatment preferences in Crohn's disease<br><br>Discrete choice experiment survey (in which prescribers are given hypothetical scenario and possible treatment options, and they are asked to choose the alternative they prefer <sup>20</sup> ) in a Hungarian professional society meeting in 2014 (n = 51)                                                                                                                                                                                                            | N/A                                                                                                                                                                                                                                                                                    | N/A                                                                                                                                                                                                                                                                                                                                                                                                                                | N/A                                                                                                                                                       | 20% had no concerns on biosimilars, 65% had some concerns on efficacy and/or safety and 12% did not support the use of biosimilars due to the lack of RCT evidence<br><br>Four clinicians were classified to "No biosimilar" attitude group, 19 to the "Biosimilar to new patients only" group and 27 to the "Biosimilar" group (one clinician was excluded from the analysis)                                                                                                                                                                                                  | Men, senior consultants, working in inflammatory bowel disease centre and treating more patients were more likely to consider biosimilars for biologic-naïve patients only<br><br>Estimated probability of choosing the originator over biosimilar, when no benefits are offered for using the biosimilar: 60%.<br>Probability of choosing the biosimilar with all kinds of benefits over the originator: 89% versus 11%<br><br>The most important attribute driving the choice: continuity of medicine supply | Estimated probability of choosing the originator over biosimilar, when no benefits are offered for using the biosimilar: 74%.<br>Probability of choosing the biosimilar with all kinds of benefits over the originator: 44% versus 56%<br><br>The most important determinant of choice: type of the treatment | N/A                                                                                                                                                                                                                                                                 |
| Barsell et al. 2017 <sup>29</sup> (USA)                | Dermatologists' knowledge and perceptions of biosimilars, whether a practice gap exists and to study misconception and barriers to biosimilar usage<br><br>Web survey of 14 multiple-choice questions for the members of five state dermatologic societies and National Psoriasis Foundation in 2015 (n = 97)                                                                                                                                                                                                                                 | 62% responded having basic understanding of biosimilars, 27% complete understanding and 11% that they have never heard of biosimilars                                                                                                                                                  | 37% were aware that biosimilars are highly similar to the reference product, 26% described biosimilar as "generic", 27% described them as same bio-drug with equal bioequivalence and 10% said they did not know the definition. Those with complete understanding (27%), 21% incorrectly described biosimilar as "generic"                                                                                                        | 35% self-study, 25% scientific publications, 17% conferences and seminars, 3% biosimilar company-sponsored events and 20% other                           | Advantages: 71% low price to patients, 68% easier access to treatment and 65% low price to payers. Disadvantages: 71% efficacy, 66% potential switch to biosimilar without physicians' knowledge, 66% safety and 63% immunogenicity. 8% believed there were no advantages<br><br>Convincing physicians of interchangeability: 44% extensive phase I, II and III studies, 37% valid longitudinal data from patient registries, 37% same level of testing (not specified more thoroughly) than generic medicines, 36% evidence of pharmacokinetic and pharmacodynamic equivalence | 25% definitely or highly likely to prescribe a biosimilar<br><br>38% will try it on very selected patients                                                                                                                                                                                                                                                                                                                                                                                                     | N/A                                                                                                                                                                                                                                                                                                           | 88% believed that there will be a political change resulting to pharmacist-led substitution without consulting physicians in the future<br><br>76% very important and 18% somewhat important to have control over whether patients receive originator or biosimilar |
| Beck et al. 2016 <sup>31</sup> (France)                | Knowledge, experience and opinions related to biosimilars and to identify expectations, barriers and possible options to promote prescription<br><br>Web survey of 22 questions for nearly 500 rheumatologists in 2015 (n = 116)                                                                                                                                                                                                                                                                                                              | 55%/3% considered they had little/no knowledge of biosimilars<br><br>5% felt very well-informed<br><br>Hospital-based rheumatologists were likely to be more familiar with biosimilars compared to office-based rheumatologists<br><br>98% had at least one question about biosimilars | 85% thought biosimilars are similar to reference products that had gone off-patent; 85% considered biosimilars have no meaningful differences in quality, 80% in safety and 90% in efficacy; 65% thought that the assessment of biosimilarity requires more comprehensive data than generic drugs; and 46% believed that biosimilar marketing authorisation is granted on the sole investigation of pharmacokinetic bioequivalence | 84% self-study and scientific publications, 76% pharmaceutical companies, 72% continuous training, 54% physician colleagues and 13% pharmacist colleagues | 44% agree and 10% strongly agree being in favour of implementation of biosimilars<br><br>Positive factors: 90% healthcare cost savings, 61% releasing of resources allowing treating additional patients, 49% positive impact on patients' access to innovative medicines and 46% health policy-makers incentives. Barriers: 67% indication extrapolation of efficacy and safety, 66% lack of information about tolerability, 59% risk of increasing patients' concerns, 57% lack of clinical trials and 55% patients' wishes to be treated with the originator                 | 7% had already prescribed biosimilars mentioned in the survey<br><br>89% considered it was conceivable to start a treatment for biologic-naïve patients                                                                                                                                                                                                                                                                                                                                                        | 25% could envision a switch                                                                                                                                                                                                                                                                                   | 58% strongly disagree and 23% disagree of approving substitution by a pharmacist                                                                                                                                                                                    |
| Chapman et al. 2018 <sup>22</sup> (the United Kingdom) | Healthcare professionals' knowledge and attitudes towards infliximab and insulin glargine biosimilars and factors influencing their prescribing and compare healthcare professionals' attitudes with the utilisation of these biosimilars in hospitals<br><br>Web-based survey of 11 questions for societies of dermatology, diabetology, gastroenterology and rheumatology in 2016-2017 and drug utilisation analysis from DEFINE database in 2015-2016 (n = 234). Other stakeholders apart from physicians are not addressed in this review | N/A                                                                                                                                                                                                                                                                                    | 72% correctly thought biosimilars are similar copies of biologic medicines, 18% thought biosimilars are generic biologic medicines, 3% counterfeit medicines, 3% had heard of them but did not know what they were, 3% had never heard of them and 1% new biological medicines<br><br>75% knew biosimilars were available on their local formulary                                                                                 | N/A                                                                                                                                                       | Gastroenterologists were most frequent prescribers of biosimilars (prescribing every day or week), followed by rheumatologists, diabetologists and dermatologists<br><br>The dominant consideration: cost saving<br><br>Increasing the use of biosimilars: regulatory guidance and robust pharmacovigilance studies, local policy, potential cost saving to organisation (whether or not savings were invested in the prescribers' department) and robust cost-effectiveness data of biosimilar vs. originator                                                                  | 95% and 90% of gastroenterologists, 92% of rheumatologists, 79% of dermatologists and 75% of diabetologists had no or minor concerns on safety<br><br>90% of gastroenterologists, 88% of rheumatologists, 74% of dermatologists and 68% of diabetologists had no or minor concerns on efficacy                                                                                                                                                                                                                 | 95% of gastroenterologists, 53% of rheumatologists, 78% of dermatologists and 69% of diabetologists had no or minor concerns on safety<br><br>93% of gastroenterologists, 55% of rheumatologists, 79% of dermatologists and 65% of diabetologists had no or minor concerns on efficacy                        | N/A                                                                                                                                                                                                                                                                 |
| Cohen et al. 2016 <sup>30</sup> (USA)                  | Dermatologists', gastroenterologists', haematologist-oncologists', medical oncologists', nephrologists' and rheumatologists' awareness, knowledge, and                                                                                                                                                                                                                                                                                                                                                                                        | N/A                                                                                                                                                                                                                                                                                    | 92% of dermatologists, 90% of gastroenterologists, 83% of rheumatologists, 74%                                                                                                                                                                                                                                                                                                                                                     | 88% scientific journals, 73% FDA and 64% physician peers. Trust to media was less than 5%                                                                 | Generally positive attitudes towards biosimilars. Dermatologists and rheumatologists appear less enthusiastic                                                                                                                                                                                                                                                                                                                                                                                                                                                                   | N/A                                                                                                                                                                                                                                                                                                                                                                                                                                                                                                            | 91% open to switching patients to a biosimilar                                                                                                                                                                                                                                                                | N/A                                                                                                                                                                                                                                                                 |

|                                                                                                                 |                                                                                                                                                                                                                                                                                                                                                                                                                                                                                                                    |                                                                                                                        |                                                                                                                                                                                                                                                                                                                                                                                                             |                                                                                                                                                                                                                                                                                                                              |                                                                                                                                                                                                                                                                                                                                                                                                                                                                                                                                                                                                                                                                                                                                                                                         |                                                                                                                                                             |                                                                                                                               |                                                                                                                                                        |
|-----------------------------------------------------------------------------------------------------------------|--------------------------------------------------------------------------------------------------------------------------------------------------------------------------------------------------------------------------------------------------------------------------------------------------------------------------------------------------------------------------------------------------------------------------------------------------------------------------------------------------------------------|------------------------------------------------------------------------------------------------------------------------|-------------------------------------------------------------------------------------------------------------------------------------------------------------------------------------------------------------------------------------------------------------------------------------------------------------------------------------------------------------------------------------------------------------|------------------------------------------------------------------------------------------------------------------------------------------------------------------------------------------------------------------------------------------------------------------------------------------------------------------------------|-----------------------------------------------------------------------------------------------------------------------------------------------------------------------------------------------------------------------------------------------------------------------------------------------------------------------------------------------------------------------------------------------------------------------------------------------------------------------------------------------------------------------------------------------------------------------------------------------------------------------------------------------------------------------------------------------------------------------------------------------------------------------------------------|-------------------------------------------------------------------------------------------------------------------------------------------------------------|-------------------------------------------------------------------------------------------------------------------------------|--------------------------------------------------------------------------------------------------------------------------------------------------------|
|                                                                                                                 | perceptions of biosimilars over time (survey will be repeated in 2-3 years)<br>Survey of 19 questions in 2015-2016 (n = 1201)                                                                                                                                                                                                                                                                                                                                                                                      |                                                                                                                        | of nephrologists, 69% of haematologist-oncologists and 63% of medical oncologists were aware which of the listed medicines in their specialty were biologic<br><br>56% of rheumatologists, 33% of gastroenterologists, 31% of dermatologists, 15% of nephrologists, 9% of medical-oncologists and 3% of haematologist-oncologists incorrectly reported there are no biosimilars available                   |                                                                                                                                                                                                                                                                                                                              | 62% considered the biosimilar will have equivalent efficacy as its originator and 57% that the biosimilar will be at least as safe as the originator<br><br>58% had concerns on patient compliance and access to treatments options with originators<br><br>Positive factors: increased access and utilization of biologic medicines, expanded treatment options and provided savings for the healthcare system                                                                                                                                                                                                                                                                                                                                                                         |                                                                                                                                                             |                                                                                                                               |                                                                                                                                                        |
| Danese et al. 2016 <sup>23</sup> (Europe, countries not reported)                                               | Evolution on thinking about biosimilars one year after they had become available in the EU. Comparison to the survey published by Danese et al. 2014 <sup>24</sup><br><br>Web survey with 14 multiple-choice questions for members of European Crohn's and Colitis Organization in 2015 (n = 118)                                                                                                                                                                                                                  | 56% judged that educational activities that they were exposed to was fair and adequate, while 16% found it unnecessary | N/A                                                                                                                                                                                                                                                                                                                                                                                                         | More information was hoped from 75% medical societies, 52% multispecialty safety registries, 47% health institutions and 26% guidelines                                                                                                                                                                                      | 29% totally confident, 18% very confident and 34% confident enough (5%, 8% and 26% in 2013) to prescribe a biosimilar<br><br>Main advantage: 92% (90% in 2013) cost-sparing. Main issue: 42% the lack of data from clinical trials for all indications<br><br>27% (67% in 2013) consider biosimilars have higher immunogenicity compared to the originator and 17% (43% in 2013) different action than the originator<br><br>51% (24% in 2013) thought biosimilar should be approved for all the indications of the originator                                                                                                                                                                                                                                                          | N/A                                                                                                                                                         | 44% (6% in 2013) would switch a patient with remission                                                                        | 89% (85% in 2013) disagreed with automatic substitution by a pharmacist<br><br>13% support substitution for new prescriptions and 13% for all patients |
| Danese et al. 2014 <sup>24</sup> (Europe, countries not reported)                                               | Awareness of and readiness to use biosimilars<br><br>Web survey of 15 questions for 1,000 randomly selected European Crohn's and Colitis Organization members in 2013 (n = 307)                                                                                                                                                                                                                                                                                                                                    | N/A                                                                                                                    | 70% were aware that biosimilar is a similar copy, but not equal to the originator, 19% responded that it is a copy of biological agent, identical to the originator, like a generic                                                                                                                                                                                                                         | Preferred information: 81% multi-specialty international safety registries to monitor safety and effectiveness, 78% health institutions on the development of rules on the use of biosimilars, 66% medical societies, 61% data regarding the registration process for biosimilars and 57% multispecialty practice guidelines | 6% thought that the originator and biosimilar were interchangeable<br><br>The main advantage: cost-sparing (89%). The main issue: different immunogenicity pattern than the originator (67%)<br><br>50% agreed biosimilars can significantly reduce healthcare costs, 27% expected them only having a marginal impact, 6% expected additional costs of introduction, regulation and pharmacovigilance to offset any potential savings<br><br>24% agreed that the tested biosimilar could be approved for all indications of the originator in terms of safety and efficacy, 19% for all rheumatologic indications, 14% for the specific indication only, 3% stated that all biosimilars could be approved for all indications of the originator and 39% disagreed with all of the above | 61% felt little or no confident in using biosimilars in their everyday clinical practice, 26% confident enough, 8% very confident, and 5% totally confident | 28% would consider replacing originator with a biosimilar                                                                     | 64% against the substitution by pharmacist<br><br>18% would agree only for new patients                                                                |
| Farhat et al. 2016 <sup>27</sup> (Algeria, Belgium, Egypt, Iran, Iraq, Italy, Jordan, Lebanon, Sudan and Syria) | Parameters on the acceptance and future prescription of biosimilars and worldwide situation focusing mainly on the EU and US laws, regulations and legislative pathways, pricing and challenging market access<br><br>Survey for over 150 healthcare professional in the conference meeting in 2015 (n = 117 health care professionals responded, of which most were physicians; exact number of physicians who responded not reported). Other stakeholders apart from physicians are not addressed in this review | N/A                                                                                                                    | 66% knew what biosimilars were, 12% did not know and 22% had not answered the question. Of those who knew (66%), 62% considered biosimilars bioequivalent to originator and have all preclinical and clinical trials equal to the originator<br><br>63% agreed that biosimilars are already marketed in the Arab and Middle Eastern markets, while 45% agreed that they are manufactured in the same region | N/A                                                                                                                                                                                                                                                                                                                          | Drivers for prescribing: 69% FDA or EMA approval, 65% lower price of bioequivalence in comparison to the originator, 48% bio-efficacy, 42% safety and 31% good manufacturing practices and high reputation of the manufacturer. 5% think biosimilars don't have advantages<br><br>35% considered the cost of treatment should not overcome its effectiveness or safety/tolerance<br><br>26% thought lower prices were good news as patients will be treated with biologics<br><br>27% consider biosimilars would bring cost savings<br><br>49% trust companies highly experienced in manufacturing small-molecule generic drugs and 55% companies with prior experience in manufacturing biologics as biosimilar producers                                                              | 41% prescribe biosimilars while 33% don't (note that respondents were also other than physicians)                                                           | N/A                                                                                                                           | N/A                                                                                                                                                    |
| Felix et al. 2014 <sup>31</sup> (USA)                                                                           | Challenges and opportunities of market uptake of biosimilars from the perspectives of physicians and payers<br><br>Survey for physicians that had written about or were familiar with biosimilars based on literature                                                                                                                                                                                                                                                                                              | N/A                                                                                                                    | N/A                                                                                                                                                                                                                                                                                                                                                                                                         | N/A                                                                                                                                                                                                                                                                                                                          | Almost all physicians (n not reported) believed that if biosimilar was approved by FDA it will perform similarly to the originator with regard to safety and efficacy<br><br>Influences of decision making: efficacy and safety, out-of-pocket costs to the patient, price of treatment and immunogenicity                                                                                                                                                                                                                                                                                                                                                                                                                                                                              | Four physicians are somewhat likely, six very likely and three not likely to prescribe a biosimilar to a new patient                                        | 31%/61% (n not reported) say they are somewhat likely/very likely to switch an existing patient from originator to biosimilar | N/A                                                                                                                                                    |

|                                                                               |                                                                                                                                                                                                                                                                                                                                                                    |                                                                                                                                                                                                                                                                                                                            |                                                                                                                                                                                                                                                             |                                                                                                                                                                                                              |                                                                                                                                                                                                                                                                                                                                                                                                                                                                                                                                                                                                                                                                                                                                                        |                                                                                                                                                                                                                                                                                                                                                                                                                                                                                                                                                                                                                                                                                     |                                                                                                                                                                                                                                                                                                  |                                                                                                                                                                                                                                                                                                                        |
|-------------------------------------------------------------------------------|--------------------------------------------------------------------------------------------------------------------------------------------------------------------------------------------------------------------------------------------------------------------------------------------------------------------------------------------------------------------|----------------------------------------------------------------------------------------------------------------------------------------------------------------------------------------------------------------------------------------------------------------------------------------------------------------------------|-------------------------------------------------------------------------------------------------------------------------------------------------------------------------------------------------------------------------------------------------------------|--------------------------------------------------------------------------------------------------------------------------------------------------------------------------------------------------------------|--------------------------------------------------------------------------------------------------------------------------------------------------------------------------------------------------------------------------------------------------------------------------------------------------------------------------------------------------------------------------------------------------------------------------------------------------------------------------------------------------------------------------------------------------------------------------------------------------------------------------------------------------------------------------------------------------------------------------------------------------------|-------------------------------------------------------------------------------------------------------------------------------------------------------------------------------------------------------------------------------------------------------------------------------------------------------------------------------------------------------------------------------------------------------------------------------------------------------------------------------------------------------------------------------------------------------------------------------------------------------------------------------------------------------------------------------------|--------------------------------------------------------------------------------------------------------------------------------------------------------------------------------------------------------------------------------------------------------------------------------------------------|------------------------------------------------------------------------------------------------------------------------------------------------------------------------------------------------------------------------------------------------------------------------------------------------------------------------|
|                                                                               | review of Medline-indexed publications (n = 14). Other stakeholders apart from physicians are not addressed in this review                                                                                                                                                                                                                                         |                                                                                                                                                                                                                                                                                                                            |                                                                                                                                                                                                                                                             |                                                                                                                                                                                                              | 50% (n not reported) consider it is very important that there are proven chemical and pharmacokinetic similarities between originators and biosimilars<br><br>Roughly half (n not reported) consider payer and cost considerations very important                                                                                                                                                                                                                                                                                                                                                                                                                                                                                                      |                                                                                                                                                                                                                                                                                                                                                                                                                                                                                                                                                                                                                                                                                     |                                                                                                                                                                                                                                                                                                  |                                                                                                                                                                                                                                                                                                                        |
| Gewanter & Reilly 2014 <sup>36</sup> (Argentina, Brazil, Colombia and Mexico) | Understanding of biosimilars, how they use them and their concerns for the future<br><br>Web-based survey for 6650 prescribers from global market research panel (n = 399)                                                                                                                                                                                         | 35% did not consider themselves familiar with biosimilars, meaning they could not define them or had never heard of them                                                                                                                                                                                                   | 49% were aware of differences between biologics, biosimilars and non-comparable biologics. 30% were unaware that clinical trials for single indication lead to approval for multiple indications                                                            | 71% seminars and conferences, 55% self-study, 32% education from biosimilar companies, 18% clinical trial participation and 4% other means<br><br>37% would like to learn from pharmaceutical companies      | 88% prescribe biologicals                                                                                                                                                                                                                                                                                                                                                                                                                                                                                                                                                                                                                                                                                                                              | 50% said they believed if two biological medicines had the same non-proprietary scientific name, patient could receive either product and have the same result                                                                                                                                                                                                                                                                                                                                                                                                                                                                                                                      | 44% said they believed if two biological medicines had the same non-proprietary scientific name, patient could be safely switched during a course of treatment, and the patient would have the same result<br><br>64% would not be comfortable switching for cost reasons rather medical reasons | N/A                                                                                                                                                                                                                                                                                                                    |
| Grabowski et al. 2015 <sup>32</sup> (Canada)                                  | Gaps in knowledge and attitudes towards biosimilars of rheumatologists<br><br>Web-based survey of 29 questions for 369 members of Canadian Rheumatology Association in February 2014 (n = 81)                                                                                                                                                                      | 31% indicated themselves being familiar or very familiar with biosimilars<br><br>Those with greater than 20 years of practice were significantly more likely to indicate themselves familiar or very familiar than those with 20 or less years of practice                                                                 | 66% considered biosimilars essentially same as generic drugs<br><br>38% were aware of Health Canada's guidance on clinical requirement for biosimilar approval                                                                                              | N/A                                                                                                                                                                                                          | 94% generally comfortable prescribing biologic medicines to their patients<br><br>31% comfortable prescribing biosimilars to their patients if biosimilar was currently available<br><br>29% declined until their colleagues recommend it<br><br>42% indicated a 30% price reduction, and a third a ≥50% price reduction being reasonable before payers mandated the use of biosimilars over brand name biologics<br><br>54% disagreed or strongly disagreed, 32% agreed or strongly agreed and 14% were neutral using biosimilars with extrapolated indications<br><br>49% not confident, 19% confident or very confident, and a third neutral on the long-term sustainability profile of the biosimilar with 30 weeks of head-to-head clinical trial | 59% consider offering biosimilars, if biosimilar demonstrates that it is comparable to the brand name drug<br><br>72% unlikely or very unlikely, 11% likely or very likely and 16% neutral to offer a biosimilar, when biologic-naïve patient is an ideal candidate, where cost is not an issue<br><br>Greater familiarity with established brand name drugs and uncertainty over the long-term safety of biosimilars were often cited among those unlikely or very unlikely offering biosimilars<br><br>54% did not typically prescribe a biosimilar, were likely or very likely to offer a biosimilar, when the provincial payer or insurance company mandated using a biosimilar | 7.5% consider switching, if biosimilar demonstrates that it is comparable to the brand name drug                                                                                                                                                                                                 | 88% concerned or very concerned if a pharmacist had the ability to substitute a biologic drug for a biosimilar without the physician's approval                                                                                                                                                                        |
| Hemington et al. 2017 <sup>35</sup> (New Zealand)                             | Perceptions and attitudes towards efficacy, safety and manufacturing of biosimilars, factors associated with positive attitudes, indication extrapolation and switching, and circumstances in which physicians would be reluctant to prescribe biosimilars<br><br>E-mail survey for 327 physicians in medical specialist society (n = 110)                         | 76% reported being familiar and having basic understanding and 13% very familiar and complete understanding of biosimilars, 9% had heard of biosimilars, but could not define them, and 2% had never heard of biosimilars                                                                                                  | N/A                                                                                                                                                                                                                                                         | N/A                                                                                                                                                                                                          | 70% very or somewhat confident of the efficacy of biosimilars<br><br>Less than 20% had negative views<br><br>Situations when biosimilars were not prescribed: 32% lack of clinical data, 17% evidence of adverse effects or lack of efficacy, 15% patients do well with current treatment and 6% patients have complex medical history<br><br>47% very confident or somewhat confident, 32% not confident and the remainder undecided in indication extrapolation                                                                                                                                                                                                                                                                                      | 71% would prescribe biosimilars for all or some clinical conditions meeting the relevant criteria, 10% would do this for only few or no clinical situations                                                                                                                                                                                                                                                                                                                                                                                                                                                                                                                         | 51% confident and 28% not very confident or not at all confident to switch patients                                                                                                                                                                                                              | N/A                                                                                                                                                                                                                                                                                                                    |
| Leonard et al. 2019 <sup>33</sup> (Europe and USA)                            | Healthcare provider knowledge, perceptions, and prescribing behaviours of biosimilars and, need for clinician-directed biosimilar education<br><br>Systematic literature review in PubMed, Embase, and Cochrane Library databases from January 2014 to March 2018 (n = 20 publications). Other stakeholders apart from physicians are not addressed in this review | Physicians often described having only little knowledge on biosimilars<br><br>The shares of described having a good knowledge were low. Those that described having a high level of familiarity with biosimilars, often incorrectly defined biosimilarity, reflecting the discrepancy between claimed and actual knowledge | Majority of physicians (in different studies that were included in the systematic review) had incomplete or basic understanding of biosimilars<br><br>Familiarity of biosimilars appeared greater in hospital-based clinicians than office-based clinicians | Self-study, peer-reviewed journals, professional guidelines, discussion with physician and pharmacist colleagues, manufacturer promotional material, educational programs and conference/ seminar attendance | Physicians were hesitant about the safety, efficacy and indication extrapolation of biosimilars. Safety concerns often related to immunogenicity and indication extrapolation concerns to the lack of clinical trials. Years of practice did not significantly effect on prescribing behaviour                                                                                                                                                                                                                                                                                                                                                                                                                                                         | Biosimilars were largely considered second-line therapies for biologic-naïve patients<br><br>Some physicians would limit the use of biosimilars to a small patient population first                                                                                                                                                                                                                                                                                                                                                                                                                                                                                                 | N/A                                                                                                                                                                                                                                                                                              | Physicians were mainly hesitant about pharmacy-driven substitution of biologic medicines<br><br>Some studies reported that physicians were unaware that interchangeability could enable pharmacist-led substitution<br><br>There were only some studies reporting positive attitudes towards pharmacy-led substitution |
| O'Callaghan et al. 2017 <sup>10</sup> (Ireland)                               | Medical specialists', general practitioners' and community pharmacists awareness of and attitudes to biosimilars                                                                                                                                                                                                                                                   | 44% of medical specialists and 5% of general practitioners very familiar with biosimilars, 41% and                                                                                                                                                                                                                         | 25% of medical specialists and 18% of general practitioners considered biosimilars                                                                                                                                                                          | Medical specialists (n = 101, not all answered this question): 72% guidelines from professional societies, 68% published                                                                                     | 59% of those aware of biosimilars in their therapeutic area (n = 73) prescribed biosimilars, while 40% didn't<br><br>Concerns: 81% efficacy in extrapolated indications, 81% immunogenicity, 79% efficacy, 78% safety, 73% quality and 62% traceability                                                                                                                                                                                                                                                                                                                                                                                                                                                                                                | 67% of medical specialists that prescribed biosimilars (n = 43) would most likely prescribe a biosimilar for treatment initiation                                                                                                                                                                                                                                                                                                                                                                                                                                                                                                                                                   | 28% of medical specialists that prescribed biosimilars (n = 43) would be likely to switch from originator to biosimilar                                                                                                                                                                          | <5% of medical specialists would consider pharmacist-led substitution appropriate                                                                                                                                                                                                                                      |

|                                                                                              |                                                                                                                                                                                                                                                                                                                                                                                                                                    |                                                                                                                                                                                                                                                                                                                      |                                                                                                                                                                                                |                                                                                                                                                                                                                                                                                              |                                                                                                                                                                                                                                                                                                                                                                                                                                                                                                                                                                                                                                                                                                                                                                                                                                                                                                                                                                                                                                                                                                              |                                                                                                                                                                                                               |                                                                                                                                                           |                                                                                                                                                                                                                                                                                                                                                                                                                 |
|----------------------------------------------------------------------------------------------|------------------------------------------------------------------------------------------------------------------------------------------------------------------------------------------------------------------------------------------------------------------------------------------------------------------------------------------------------------------------------------------------------------------------------------|----------------------------------------------------------------------------------------------------------------------------------------------------------------------------------------------------------------------------------------------------------------------------------------------------------------------|------------------------------------------------------------------------------------------------------------------------------------------------------------------------------------------------|----------------------------------------------------------------------------------------------------------------------------------------------------------------------------------------------------------------------------------------------------------------------------------------------|--------------------------------------------------------------------------------------------------------------------------------------------------------------------------------------------------------------------------------------------------------------------------------------------------------------------------------------------------------------------------------------------------------------------------------------------------------------------------------------------------------------------------------------------------------------------------------------------------------------------------------------------------------------------------------------------------------------------------------------------------------------------------------------------------------------------------------------------------------------------------------------------------------------------------------------------------------------------------------------------------------------------------------------------------------------------------------------------------------------|---------------------------------------------------------------------------------------------------------------------------------------------------------------------------------------------------------------|-----------------------------------------------------------------------------------------------------------------------------------------------------------|-----------------------------------------------------------------------------------------------------------------------------------------------------------------------------------------------------------------------------------------------------------------------------------------------------------------------------------------------------------------------------------------------------------------|
|                                                                                              | E-mail-survey of 14-20 questions for 2917 physicians in national professional societies in 2016 (n = 253 analysed answers from general practitioners and n = 102 from medical specialists). Other stakeholders apart from physicians are not addressed in this review                                                                                                                                                              | 35% familiar , and 6% and 25% had never heard the term "biosimilar"                                                                                                                                                                                                                                                  | the same as generic medicines<br><br>31% of medical specialists incorrectly agreed that biological medicines sharing the same international non-proprietary name were "structurally identical" | literature and 63% educational events<br><br>GPs (n = 247, not all answered this question): 58% national or hospital formularies                                                                                                                                                             |                                                                                                                                                                                                                                                                                                                                                                                                                                                                                                                                                                                                                                                                                                                                                                                                                                                                                                                                                                                                                                                                                                              |                                                                                                                                                                                                               |                                                                                                                                                           | 49% consider decisions should be taken by the prescriber on treatment initiation and 61% during treatment course. 43% consider decisions should be agreed with clinician in advance on treatment initiation and 35% during treatment course<br><br>84% think notifications for physician very important or critical in treatment initiation and 90% during treatment course                                     |
| O'Dolinar & Reilly 2014 <sup>25</sup> (France, Germany, Italy, Spain and the United Kingdom) | Nephrologists', rheumatologists', dermatologists', neurologists', endocrinologists' and oncologists' attitudes on biosimilar naming, substitution, and knowledge, sources of information and need for further education on biosimilars<br><br>Web-based 15-minutes short survey for 4,324 global physician market research panel of at the last quarter of 2013. 470 prescribers (20% of each five countries) completed the survey | 46% responded having basic understanding, 43% complete understanding, 11% could not define biosimilars and 1% had never heard of biosimilars<br><br>53% incorrectly thought biosimilar and originator were structurally identical and 37% incorrectly believed biosimilars are clinically tested for all indications | N/A                                                                                                                                                                                            | 47% conferences and seminars, 35% self-study, 11% studies sponsored by biosimilar companies and 6% equally studies sponsored by innovator companies, clinical trial participation and other routes                                                                                           | 48% said it was very important, 24% critically important, 23% somewhat important, 4% slightly important and 1% not important to have a sole authority to select the medicine                                                                                                                                                                                                                                                                                                                                                                                                                                                                                                                                                                                                                                                                                                                                                                                                                                                                                                                                 | 47% considered that products with the same non-proprietary name could be safely given to a patient with same results, 40% didn't think that way                                                               | 45% think patients can't be switched between the products with same non-proprietary names, 39% believed patients could be switched safely and effectively | 62% not acceptable, 35% acceptable and 3% totally acceptable on pharmacist-led substitution<br><br>47% very important, 30% critical, 6% slightly important and 1% not important to receive a notification if the pharmacist had dispensed other than prescribed biologic medicine during a repeated treatment                                                                                                   |
| van Overbeeke et al. 2017 <sup>28</sup> (Belgium)                                            | Knowledge and perceptions of patients and physicians with regard to originators and biosimilars and differences in perceptions and the factors influencing their preferences<br><br>Web survey of multiple-choice and open-ended questions for all 232 Belgian rheumatologists in 2016 (n = 41 responded). Other stakeholders apart from physicians are not addressed in this review                                               | 95% considered biosimilars are similar, but not identical                                                                                                                                                                                                                                                            | 90% were able to share the most complete definition of a biosimilar                                                                                                                            | N/A                                                                                                                                                                                                                                                                                          | 7% had prescribed biosimilars. 73% preferred the originator when the prices were equal and 38% when originator was more expensive. When prices were equal, none preferred biosimilar.<br><br>93% considered price, 63% safety, 61% quality and 61% efficacy as sources of differences between originators and biosimilars<br><br>33% considered biosimilars and originators interchangeable if biosimilarity is proven in the same indication and 38% in indications where the medicine works via the same biological mechanism. 28% considered that biosimilars and originators were never interchangeable<br><br>56% think extrapolation could only be performed if efficacy and safety is proven to be similar in one of the indications and if the medicine works via the same mechanism in the other indications. 39% stated the indications should never be extrapolated<br><br>Positive influencers: clinical trials with positive results and clinical data in the respective indication. Negative influencers: less studied than the originator and no clinical trials in the respective indication | 8% would not prescribe a biosimilar and 60% would only prescribe a biosimilar to biologic-naïve patients.                                                                                                     | N/A                                                                                                                                                       | N/A                                                                                                                                                                                                                                                                                                                                                                                                             |
| Reilly & Murby 2017 <sup>24</sup> (Australia)                                                | Opinions on the naming of biologicals and biosimilars, how the use of these medicines is recorded and their views on substitution of, familiarity with, knowledge of, attitudes to and beliefs in biosimilars<br><br>Web-based survey for prescribers recruited from a global, commercial database of health care professional in 2016 (n = 451, of which 160 completed the survey)                                                | 21% considered themselves very familiar and having complete understanding of biosimilars, 73% basic understanding and 6% could not define them                                                                                                                                                                       | 50% thought biosimilars go through the same regulatory process as original biologics<br><br>70% knew biosimilars could be approved for all or for some indications of the originator           | 46% published literature, 28% colleagues, 27% information from Pharmaceutical Benefits Advisory Committee, 24% product information label, 19% information from Therapeutic Goods Administration, 18% sales representative, 13% hospital formulary<br><br>43% never used published literature | N/A                                                                                                                                                                                                                                                                                                                                                                                                                                                                                                                                                                                                                                                                                                                                                                                                                                                                                                                                                                                                                                                                                                          | 16% would be comfortable prescribing a biosimilar that was approved for several indications based on clinical trials in only one indication, 11% would not feel comfortable and 73% had some concerns on this | N/A                                                                                                                                                       | 54% very and 36% critically important to have sole authority to decide of which biological was dispensed<br><br>Evidence required for pharmacist-led substitution: 53% clinical trial data of no safety of efficacy risks in switching, 53% clinical trial data of no safety of efficacy risks after multiple switches, 27% in-market experience, 24% observational data and 6% no evidence would be sufficient |
| Sullivan et al. 2017 <sup>27</sup> (Germany)                                                 | Motivators of prescribing biosimilars, preferences matching actual prescribing behaviour and patient                                                                                                                                                                                                                                                                                                                               | N/A                                                                                                                                                                                                                                                                                                                  | N/A                                                                                                                                                                                            | N/A                                                                                                                                                                                                                                                                                          | Biosimilars account for 12-13% of all biologic therapies the respondents prescribe                                                                                                                                                                                                                                                                                                                                                                                                                                                                                                                                                                                                                                                                                                                                                                                                                                                                                                                                                                                                                           | 88% would prefer to prescribe originator to biosimilar as 1st line therapy                                                                                                                                    | N/A                                                                                                                                                       | N/A                                                                                                                                                                                                                                                                                                                                                                                                             |

1  
2  
3  
4  
5  
6  
7  
8  
9  
10  
11  
12  
13  
14  
15  
16  
17  
18  
19  
20  
21  
22  
23  
24  
25  
26  
27  
28  
29  
30  
31  
32  
33  
34  
35  
36  
37  
38  
39  
40  
41  
42  
43  
44  
45  
46

|                                                  |                                                                                                                                                                                                                                                                                                                                                                                                                                                                                                                                                                                                                                                                                                                                                                                                                                                                          |     |     |     |                                                                                                                                                                                                                                                                                                                                                                                                                         |                                                                             |     |     |
|--------------------------------------------------|--------------------------------------------------------------------------------------------------------------------------------------------------------------------------------------------------------------------------------------------------------------------------------------------------------------------------------------------------------------------------------------------------------------------------------------------------------------------------------------------------------------------------------------------------------------------------------------------------------------------------------------------------------------------------------------------------------------------------------------------------------------------------------------------------------------------------------------------------------------------------|-----|-----|-----|-------------------------------------------------------------------------------------------------------------------------------------------------------------------------------------------------------------------------------------------------------------------------------------------------------------------------------------------------------------------------------------------------------------------------|-----------------------------------------------------------------------------|-----|-----|
|                                                  | <p>acceptance, satisfaction and concerns on biosimilars and how these relate to the treatment with originators or biosimilars</p> <p>Real world, cross-sectional study (in which physicians filled a survey form and reported their prescribing, and recruited patients that also filled a questionnaire form to provide information on how reported prescribing was occurred in practice) in 2015-2016 (n = 25). Other stakeholders apart from physicians are not addressed in this review</p> <p>Based on their response, 11 physicians were assigned to investigative (primarily concerned with symptom improvement and disease modification), 7 to conservative (primarily concerned with safety) and 7 to other (influenced primarily by other factors)</p>                                                                                                         |     |     |     | <p>Reasons to prescribe: desire to get experience with the new product (89% of investigative, 100% of conservative and 57% of other), being convinced of equivalent efficacy compared to originators (44%, 67% and 43%), lower cost (44%, 83% and 71%), believing that is economic prescribing (44%, 83% and 57%) and believing that using biosimilars makes savings which can be used elsewhere (22%, 67% and 29%)</p> |                                                                             |     |     |
| <p>Waller et al. 2017<sup>28</sup> (Germany)</p> | <p>Motivators of prescribing biosimilars, preferences matching actual prescribing behaviour, and patient acceptance, satisfaction and concerns on biosimilars and how these relate to the treatment with originators or biosimilars</p> <p>Real world, cross-sectional study (in which physicians filled a survey form and reported their prescribing, and recruited patients that also filled a questionnaire form to provide information on how reported prescribing was occurred in practice) in 2015-2016 (n = 50). Other stakeholders apart from physicians are not addressed in this review</p> <p>Based on their response, 23 physicians were assigned to investigative (primarily concerned with symptom improvement and disease modification), 17 to conservative (primarily concerned with safety) and 10 to other (influenced primarily by other factors)</p> | N/A | N/A | N/A | <p>Biosimilars constitute less than 10% of the biologic therapies the respondents prescribed</p> <p>Reasons to prescribe: desire to get experience with the new product (86% of investigative, 65% of conservative and 50% of other), being convinced of equivalent efficacy compared to originators (64%, 65% and 50%) and lower costs (64%, 71% and 88%)</p>                                                          | >95% would prefer to prescribe originator to biosimilar as 1st line therapy | N/A | N/A |

1  
2  
3  
4 Physicians use several information sources on biologic medicines, such as scientific publications (25–84%), self-  
5 study (35–84%), pharmaceutical companies (32–76%), guidelines from professional societies (26–75%),  
6 educational events and conferences (17–71%), other published literature (46–68%), physician colleagues (28–  
7 54%), safety registries (52%) and pharmacist colleagues (19%)<sup>10, 16, 18, 21, 23-25, 29-30, 33-34, 36</sup> (**Table 2**). According to  
8 a single study and a systematic literature review, information sources may vary according to the educational  
9 background of physicians, as the most common information source were the guidelines from professional societies  
10 for medical specialists and the national or hospital formularies for general practitioners<sup>10, 33</sup>.  
11  
12  
13  
14  
15  
16  
17  
18  
19  
20  
21  
22  
23  
24  
25  
26  
27  
28  
29  
30  
31  
32  
33  
34  
35  
36  
37  
38  
39  
40  
41  
42  
43  
44  
45  
46  
47  
48  
49  
50  
51  
52  
53  
54  
55  
56  
57  
58  
59  
60

For peer review only

Table 3. Summary of the quality evaluation of the 23 included studies of this systematic review.

| Reference                               | Main strengths                                                                                                                       | Main limitations                                                                                                                                                                                                                                                             | Quality according to the quality assessment protocol |
|-----------------------------------------|--------------------------------------------------------------------------------------------------------------------------------------|------------------------------------------------------------------------------------------------------------------------------------------------------------------------------------------------------------------------------------------------------------------------------|------------------------------------------------------|
| Aladul et al. 2019 <sup>17</sup>        | Results logically and clearly displayed                                                                                              | Details of the questionnaire form were not available, discussion on methodology partly lacking                                                                                                                                                                               | High                                                 |
| Baji et al. 2016a <sup>19</sup>         | Well-described and logically presented methodology, results and discussion                                                           | Ethical discussion lacking                                                                                                                                                                                                                                                   | High                                                 |
| Baji et al. 2016b <sup>20</sup>         | Well-described and logically presented methodology, results and discussion                                                           | Critical and ethical discussion partly lacking                                                                                                                                                                                                                               | High                                                 |
| Chapman et al. 2018 <sup>22</sup>       | Mainly well-described and logically presented methodology, results and discussion                                                    | More in-depth information could have been collected by a qualitative study                                                                                                                                                                                                   | High                                                 |
| Grabowski et al. 2015 <sup>32</sup>     | Well-described and logically presented methodology, results and discussion                                                           | More in-depth information could have been collected by a qualitative study                                                                                                                                                                                                   | High*                                                |
| Hemmington et al. 2017 <sup>35</sup>    | Well-described and logically presented methodology, results and discussion                                                           | Details of the questionnaire form were not available, more in-depth information could have been collected by a qualitative study                                                                                                                                             | High                                                 |
| Leonard et al. 2019 <sup>33</sup>       | Systematic approach with well-described methodology, results and discussion                                                          | Quality assessment of publications selected for systematic review is lacking, data not extracted study by study basis, no two reviewers in all steps of the systematic literature review process                                                                             | High                                                 |
| O'Callaghan et al. 2017 <sup>10</sup>   | Well-described and logically presented methodology, results and discussion                                                           | More in-depth information could have been collected by a qualitative study                                                                                                                                                                                                   | High                                                 |
| van Overbeeke et al. 2017 <sup>26</sup> | Well-described and logically presented methodology, results and discussion                                                           | More in-depth information could have been collected by a qualitative study                                                                                                                                                                                                   | High                                                 |
| Aladul et al. 2018 <sup>18</sup>        | Semi-structured interviews provide a more in-depth view on the perceptions of healthcare professional in comparison to short surveys | Exact numbers of respondents which certain opinion (n) not always reported, low number of representatives per each professional group                                                                                                                                        | Moderate*                                            |
| Barsell et al. 2017 <sup>29</sup>       | Well-presented results and discussion                                                                                                | Details of the questionnaire form were not available, description of methodology lacking, e.g. dropout not described, ethical discussion lacking                                                                                                                             | Moderate                                             |
| Beck et al. 2016 <sup>21</sup>          | Well-presented results and discussion                                                                                                | Details of the questionnaire form were not available, validity of the instrument unclear, as more in-depth information could have been collected by a qualitative study, dropout not described accurately                                                                    | Moderate*                                            |
| Sullivan et al. 2017 <sup>27</sup>      | Results clearly presented                                                                                                            | Dropout not described accurately, some inconsistencies in the presentation of methodology and discussion                                                                                                                                                                     | Moderate*                                            |
| Waller et al. 2017 <sup>28</sup>        | Well-presented results and discussion                                                                                                | Some inconsistencies in the presentation of methodology, e.g. sample selection and dropout                                                                                                                                                                                   | Moderate*                                            |
| Akhmetov et al. 2015 <sup>15</sup>      | Explicit aims                                                                                                                        | Clear presentation of results lacking, critical and ethical discussion lacking                                                                                                                                                                                               | Low                                                  |
| Cohen et al. 2016 <sup>30</sup>         | Mainly well-presented results and discussion                                                                                         | Details of the questionnaire form were not available, description of methodology lacking, ethical discussion lacking                                                                                                                                                         | Low                                                  |
| Danese et al. 2016 <sup>23</sup>        | Results clearly presented                                                                                                            | Details of the questionnaire form were not available, critical and ethical discussion partly lacking, description of methodology partly lacking                                                                                                                              | Low                                                  |
| Danese et al. 2014 <sup>24</sup>        | Results clearly presented                                                                                                            | Statistical analyses lacking, critical and ethical discussion lacking, description of methodology partly lacking, for example the number of invited members not mentioned                                                                                                    | Low                                                  |
| Farhat et al. 2016 <sup>37</sup>        | Mainly logically presented methodology                                                                                               | Aim is not explicitly presented, number of physicians who responded not reported, results presented in table format only, critical discussion lacking                                                                                                                        | Low*                                                 |
| Felix et al. 2014 <sup>31</sup>         | Explicit aims                                                                                                                        | Strategic sample selection, details of the questionnaire form were not available, exact numbers of respondents which certain opinion (n) not always reported, description of used statistical methods and data analysis lacking, inconsistency in the description of results | Low                                                  |
| Gewanter & Reilly 2014 <sup>36</sup>    | Explicit aims                                                                                                                        | Respondents from market research panel resulting that respondents work in disciplines in which don't necessarily involve biosimilars, such as psychiatry, description of used statistical methods and data analysis lacking, critical and ethical discussion lacking         | Low                                                  |
| O'Dolinar & Reilly 2014 <sup>25</sup>   | Explicit aims                                                                                                                        | Intentional sample selection, clear presentation of results lacking, critical and ethical discussion lacking                                                                                                                                                                 | Low                                                  |
| Reilly & Murby 2017 <sup>34</sup>       | Explicit aims                                                                                                                        | Description of data collection partly lacking, description of used statistical methods and data analysis lacking                                                                                                                                                             | Low                                                  |

\* Differences in opinions of which quality grade each publication was given, set in consensus



### Attitudes towards and experienced advantages and disadvantages of biosimilars (n = 22)

Physicians' reported attitudes towards biosimilars seem contradictory<sup>10, 19-24, 26-32, 35-37</sup> (Table 2). Some (6–38%) physicians consider biosimilars and originator products interchangeable, while others (28%) never think so<sup>24, 26</sup>. Some studies show that 65–67% of physicians have concerns regarding biosimilars<sup>19-20</sup>, while others report that 54–94% of physicians feel somewhat or very confident prescribing biosimilars<sup>10, 21, 23, 32, 35</sup>. Regardless, a positive attitude towards biosimilars does not automatically translate into prescribing, as physicians seem to prefer originator products to biosimilars<sup>19, 26, 32</sup>. Studies indicate that there might be differences in attitudes towards biosimilars between specialties: gastroenterologists seem frequent prescribers of biosimilars, while dermatologists and rheumatologists seem less enthusiastic<sup>18, 22, 30</sup>.

The main experienced advantages of biosimilars are cost savings<sup>17, 21-24, 29</sup>, lower price in comparison to the originator biologic medicine<sup>29, 37</sup> and physicians' willingness to try new treatments<sup>27-28</sup> (Table 2). Additionally, in single studies, robust pharmacovigilance studies<sup>17</sup>, easier access to treatment for patients<sup>29</sup>, and approval of the European Medicines Agency or the Food and Drug Administration<sup>37</sup> were reported as motivators for prescribing biosimilars. Most commonly reported disadvantages were distrust in safety<sup>10, 17, 21, 29, 31, 33</sup>, efficacy<sup>10, 17, 21, 29, 31, 33</sup>, immunogenicity<sup>10, 24, 29, 33</sup> and indication extrapolation of biosimilars<sup>10, 32-33</sup> or the lack of clinical data on biosimilars<sup>23, 33, 35</sup>. Single studies also suggested the quality<sup>10</sup>, traceability<sup>10</sup> or tolerability<sup>21</sup> of biosimilars and patients' concerns towards biosimilars<sup>21</sup> as disadvantages.

### Initiation of biosimilars and switches between original biologic medicines and biosimilars (n = 22)

Physicians (39–89%) seem more eager to prescribe a biosimilar for biologic-naïve patients rather than patients already treated with biologic medicines<sup>10, 19, 22, 24, 26-29, 31-37</sup> (Table 2). In discrete choice experiment studies, for example, 61–84% of gastroenterologists chose biosimilars in at least one of the choice sets for biological-naïve patients<sup>19-20</sup>. However, there are also other factors affecting the medicine selection, such as the cost of the medicines. It was reported, that if cost were not an issue, only 11% of physicians would choose a biosimilar for treatment initiation<sup>32</sup>. Additionally, studies suggest that some personal characteristics may influence on the uptake of biosimilars by individual physicians. Men, senior consultants and those treating more patients<sup>20</sup>, along with those with greater familiarity with brand name medicines and uncertainty of long-term safety of biosimilars<sup>32</sup> were often unlikely to choose a biosimilar as initial therapy. Within medical specialties, gastroenterologists (95% with no concerns) appear most confident to use biosimilars in treatment initiations, followed by rheumatologists (92%), dermatologists (79%) and diabetologists (75%)<sup>22</sup>.

Physicians did not seem eager to switch an originator biologic medicine to a biosimilar<sup>10, 19-24, 30-32, 35-36</sup> (Table 2). The share of physicians that were willing to switch an originator to a biosimilar was 51 % or less with the exception of a single study in which the percentage was 91%<sup>10, 21, 23-24, 30, 32, 35</sup>. Similarly, when it comes to treatment initiation, medical specialty of the individual physician affects his or her willingness to switch biologic medicines<sup>22</sup>. Gastroenterologists (95% with no concerns) seem most confident on switching, followed by dermatologists (78%), diabetologists (69%) and, notably, rheumatologists (53%).

### Pharmacist-led substitution of biologic medicines (n = 10)

Physicians (64–95%) are concerned about or disagree with pharmacist-led substitution of biologic medicines<sup>10, 18, 21, 23-25, 29, 32-34</sup> (Table 2). Studies suggest that having full autonomy on medicine selection and being fully aware of which medicines their patient receives, was often crucial for physicians<sup>10, 25, 29, 34</sup>. However, according to a single study, 88% of physicians believe that there will be a political change resulting to pharmacist-led substitution without consulting physicians in the future<sup>29</sup>.

#### 4 DISCUSSION

According to this systematic review, physicians' knowledge on biosimilars varies widely. In general, measured knowledge appears weaker than self-assessed knowledge. Physicians use multiple information sources on biologic medicines, most commonly scientific publications, pharmaceutical companies and professional societies. Similar to their knowledge, physicians' perceptions towards biosimilars and the uptake of these medicines also vary. Physicians seem to prefer originator products to biosimilars and prescribe biosimilars mainly for biologic-naïve patients. Physicians consider cost savings and lower price in comparison to the originator biologic medicine as main advantages of biosimilars, while doubts often relate to safety, efficacy and immunogenicity of biosimilars. Most physicians have negative perceptions towards pharmacist-led substitution of biologic medicines.

##### **Physicians' knowledge on biosimilars**

This study found that physicians' knowledge on biosimilars appears inadequate. This may contribute to low prescribing and uptake of biosimilars<sup>10, 30, 33</sup>. Although this issue has been widely recognised, there is limited evidence on the effectiveness of education interventions on prescribing<sup>39</sup>. On the contrary, academic detailing has proven to be effective in steering prescribing<sup>40-41</sup>. Academic detailing is a method in which a trained educator meets with a healthcare professional and shares the latest evidence-based information on the topic that is educated<sup>42</sup>. Besides its' effectiveness in steering prescribing patterns, academic detailing has been proven to improve the cost-effectiveness of prescribing and reduce medical costs<sup>43-44</sup>. It is vital that in the near future physicians and other healthcare professionals are provided targeted, evidence-based information on biosimilars to support their uptake and to gain the full cost-saving potential of these medicines<sup>45-46</sup>. The educational efforts from medical societies is also vital in the distribution of appropriate biosimilar information<sup>11</sup>.

##### **Physicians' attitudes towards biosimilars and means to enhance the uptake**

According to this study, physicians' attitudes towards biosimilars are contradictory and the prescribing of biosimilars is more often directed to biologic-naïve patients. This is despite of convincing evidence that supports switching<sup>47</sup>. Prescribing decisions can either be made by individual physicians or, if thereafter necessary, they can be steered by binding policies that vary across countries. Furthermore, besides actual steering policies, there are general differences across health systems in prescribing, dispensing, pricing and reimbursement of biologic medicines that may effect on the uptake.<sup>10-11</sup>. For example in Denmark and Norway, hospital, regional or national tendering is in use, resulting in significant savings in the purchase of biologic medicines<sup>11, 48-49</sup>. Some countries have implemented incentives for healthcare professionals<sup>11</sup>. Prescription quotas that define the ratio of biosimilars of all prescribed biologic medicines, are in use in Germany and Sweden<sup>50</sup>, while gain-sharing agreements that enable using the savings from biosimilar uptake to be used in the benefit of the clinic or the organisation are used in Sweden and in the United Kingdom<sup>51-52</sup>. Pharmacist-led substitution of biologic medicines can also be seen as a potential mean to enhance the uptake of biosimilars<sup>11, 29</sup>. Pharmacist-led substitution is legislatively possible in France and in the United States, and for some biological medicines in Australia<sup>53-55</sup>. Furthermore, the implementation of pharmacist-led substitution is currently ongoing in some European countries<sup>45, 56</sup>. All these initiatives highlight that the weak uptake of biosimilars has been acknowledged globally, and there is a need to discover sustainable means to enhance and stabilize their uptake<sup>11</sup>. What complicates the issue is that, for example in Europe, even though the biosimilarity between biologic medicines is stated by the European Medicines Agency, the decisions on the interchangeability and substitution are made at the national level. In order to support the uptake of biosimilars, educational measures for both healthcare professionals and patients are needed, although the role of national recommendations, policies and steering for switching and substitution of biologic medicines should not be understated<sup>29, 45-46</sup>.

### Strengths and limitations

To the authors' knowledge, systematic reviews solely on the physicians' perceptions towards the uptake of biosimilars have not been published prior to this review. However, the results of this review are in line with an earlier systematic review on healthcare providers' perceptions on biosimilars<sup>33</sup>. Notable points on the earlier review on healthcare providers' perceptions, that were improved for this review, were that no quality assessment of included studies was conducted in the previous review, there was only one reviewer screening full texts for inclusion, and that the data was not separately extracted study-by-study basis. Thus, this review provides novel information on the topic with more systematic approach. In addition, main strengths of our review are that the literature search was conducted with the help of an experienced information specialist, and the quality evaluation of studies was conducted independently by two researchers in order to avoid bias<sup>57</sup>. Whereas one major limitation of this review was that the study-by-study data extraction was only done by one researcher. Furthermore, theses or reports by authorities that could have included research results were excluded from this study. In addition, any of the available protocols for quality assessment did not cover different types of study settings and the protocol used in this study was compiled from four separate protocols. In addition, included studies were conducted in different countries with unique regulatory laws and policies that undoubtedly effect on the uptake and prescribing of biosimilars in the national level. Regardless, it is vital to compile studies from different countries with different systems and policies in order to form a comprehensive view on the current situation on the uptake of biosimilars. One notable point is also that the data in the studies that were included in this review were mainly collected in 2017 or before. The topic is very timely and perceptions towards the uptake of biosimilars may change according to new research information, interventions and experience in using these medicines. Thus, there is a need to continue examining perceptions of physicians, both in general and with different disciplines, particularly with qualitative research methods. Further studies are needed to explore the differences between disciplines in the attitudes towards and prescribing of biosimilars as the reasons behind these differences were not possible to explore in detail based on the studies included in this review.

### Practical implications

This systematic review provides up-to-date knowledge on the physicians' perceptions on the uptake of biosimilars and highlights the need for further education and steering upon this issue. The knowledge provided by the review may be utilised in visioning future means to enhance the uptake of biosimilars that could include information sharing and educational interventions by means of e.g. academic detailing. Uptake of biosimilars may also be enhanced by implementing national policies or steering procedures to support the uptake, by means of pharmacist-led substitution of biologic medicines, for example.

## 5 CONCLUSIONS

This systematic review concludes that physicians' knowledge on and attitudes towards biosimilars vary. Although physicians have positive attitudes towards biosimilars, prescribing is limited, especially for patients that are already treated with biologic medicines. Perceptions towards the pharmacist-led substitution of biologic medicines are often negative. Education and national recommendations and policies for switching and substitution of biologic medicines are needed to support the uptake of biosimilars.

### FUNDING

This study is a part of a larger research project funded by the Social Insurance Institution of Finland (Kela), grant (31/26/2017). The funder had no role in the planning or conduction of this review.

### COMPETING INTERESTS

Authors declare no competing interests.

### AUTHOR'S CONTRIBUTIONS

KS, MM, JJ and KHA contributed to the conception or study design. KS and MM acted as principal investigators in the search and evaluation of the literature and in the quality assessment. KS drafted the manuscript. All authors participated in critical revision of the manuscript and approved the final version.

### PATIENT CONSENT

Not required.

### ETHICAL CONSENT

Not required.

### PATIENT AND PUBLIC INVOLVEMENT

This research was done without patient involvement. Patients were not invited to comment on the study design and were not consulted to develop patient relevant outcomes or interpret the results. Patients were not invited to contribute to the writing or editing of this document for readability or accuracy.

### DATA SHARING STATEMENT

All data relevant to the study are included in the article or uploaded as supplementary information.

### REFERENCES

- 1 European Commission. Directive 2001/83/EC of the European Parliament and of the Council of 6 November 2001 on the Community code relating to medicinal products for human use (2001).
- 2 United States Food and Drug Administration. Biosimilar and Interchangeable Products. Updated 2018a. Accessed 27 Jun 2019: [www.fda.gov/Drugs/DevelopmentApprovalProcess/HowDrugsareDevelopedandApproved/ApprovalApplications/TherapeuticBiologicApplications/Biosimilars/ucm580419.htm](http://www.fda.gov/Drugs/DevelopmentApprovalProcess/HowDrugsareDevelopedandApproved/ApprovalApplications/TherapeuticBiologicApplications/Biosimilars/ucm580419.htm)
- 3 McCamish M, Woollett G. Worldwide experience with biosimilar development. *MABs* 2011;3(2):209–17.
- 4 European Medicines Agency. Biosimilar medicines: Overview. Updated 2018a. Accessed 27 Jun 2019: [www.ema.europa.eu/en/human-regulatory/overview/biosimilar-medicines](http://www.ema.europa.eu/en/human-regulatory/overview/biosimilar-medicines)
- 5 QuintilesIMS. 2017 IMS Biosimilar report - The Impact of Biosimilar Competition in Europe. Updated 2017. Accessed 27 Jun 2019: <http://ec.europa.eu/DocsRoom/documents/23102>
- 6 European Medicines Agency. Medicines search. Updated 2018b. Accessed 27 Jun 2019: [www.ema.europa.eu/en/medicines/field\\_ema\\_web\\_categories%253Aname\\_field/Human/ema\\_group\\_types/ema\\_medicine/field\\_ema\\_med\\_status/authorised-36/ema\\_medicine\\_types/field\\_ema\\_med\\_biosimilar/field\\_ema\\_web\\_categories%253Aname\\_field/Human/search\\_api\\_aggregation\\_ema\\_medicine\\_types/field\\_ema\\_med\\_biosimilar/ema\\_group\\_types/ema\\_medicine/field\\_ema\\_med\\_status/authorised-36?sort=ema\\_medicine\\_title&order=asc](http://www.ema.europa.eu/en/medicines/field_ema_web_categories%253Aname_field/Human/ema_group_types/ema_medicine/field_ema_med_status/authorised-36/ema_medicine_types/field_ema_med_biosimilar/field_ema_web_categories%253Aname_field/Human/search_api_aggregation_ema_medicine_types/field_ema_med_biosimilar/ema_group_types/ema_medicine/field_ema_med_status/authorised-36?sort=ema_medicine_title&order=asc)
- 7 United States Food and Drug Administration. Biosimilar Product Information. Updated 2018b. Accessed 27 Jun 2019: [www.fda.gov/drugs/developmentapprovalprocess/howdrugsaredevelopedandapproved/approvalapplications/therapeuticbiologicapplications/biosimilars/ucm580432.htm](http://www.fda.gov/drugs/developmentapprovalprocess/howdrugsaredevelopedandapproved/approvalapplications/therapeuticbiologicapplications/biosimilars/ucm580432.htm)
- 8 Blackstone A, Fuhr JP. The Economics of Biosimilars. *Am Health Drug Benefits* 2013;6(8):469–78.

- 1  
2  
3 9 European Commission. What you Need to Know about Biosimilar Medicinal Products. A Consensus  
4 Information Document. Updated 2013. Accessed 27 Jun 2019:  
5 <http://ec.europa.eu/DocsRoom/documents/8242/attachments/1/translations>  
6
- 7 10 O'Callaghan J, Bermingham M, Leonard M, et al. Assessing awareness and attitudes of healthcare  
8 professionals on the use of biosimilar medicines: A survey of physicians and pharmacists in Ireland. *Regul*  
9 *Toxicol Pharmacol* 2017;88:252–61.
- 10 11 O'Callaghan J, Barry SP, Bermingham M, et al. Regulation of biosimilar medicines and current perspectives of  
11 interchangeability and policy. *Eur J Clin Pharmacol* 2019;75(1):1–11.
- 12 12 Åkesson KM, Saveman B-I, Nilsson G. Health care consumers' experiences of information communication  
13 technology – A summary of literature. *Int J Med Inform* 2007;76:633–45.
- 14 13 Tong A, Sainsbury P, Graig J. Consolidated criteria for reporting qualitative research (COREQ): a 32-item  
15 checklist for interviews and focus groups. *Int J Qual Health Care* 2007;19(6):349–57.
- 16 14 Joanna Briggs Institute. Reviewers' manual 2014. Updated 2014. Accessed 27 Jun 2019:  
17 <http://joannabriggs.org/assets/docs/sumari/reviewersmanual-2014.pdf>  
18
- 19 15 Swedish Agency for Health Technology Assessment and Assessment of Social Services. Evaluation and  
20 synthesis of studies using qualitative methods of analysis. Updated 2016. Accessed 27 Jun 2019:  
21 [www.sbu.se/globalassets/ebm/metodbok/sbuhandbook\\_qualitativemethodsofanalysis.pdf](http://www.sbu.se/globalassets/ebm/metodbok/sbuhandbook_qualitativemethodsofanalysis.pdf)  
22
- 23 16 Akhmetov I, Farista R, Thimmaraju PK. A Study to Assess the Awareness of the Biosimilars among Ukrainian  
24 Physicians. *J Bioanal Biomed* 2015;7(2):66–9.
- 25 17 Aladul MI, Fitzpatrick RW, Chapman SR. Differences in UK healthcare professionals' knowledge, attitude and  
26 practice towards infliximab and insulin glargine biosimilars. *Int J Pharm Pract* 2019;27(2):214–7.
- 27 18 Aladul MI, Fitzpatrick RW, Chapman SR. Healthcare professionals' perceptions and perspectives on biosimilar  
28 medicines and the barriers and facilitators to their prescribing in UK: a qualitative study. *BMJ Open*  
29 2018;8:e023603.
- 30 19 Baji P, Gulácsi L, Golovics PA, et al. Perceived Risks Contra Benefits of Using Biosimilar Drugs in Ulcerative  
31 Colitis: Discrete Choice Experiment among Gastroenterologists. *Value Health Reg Issues* 2016a;10C:85–90.
- 32 20 Baji P, Gulácsi L, Lovász BD, et al. Treatment preferences of originator versus biosimilar drugs in Crohn's  
33 disease; discrete choice experiment among gastroenterologists. *Scand J Gastroenterol* 2016b;51:22–7.
- 34 21 Beck M, Michel B, Rybarzyck-Vigouret MC, et al. Rheumatologists' Perceptions of Biosimilar Medicines  
35 Prescription: Findings from a French Web-Based Survey. *BioDrugs* 2016;30:585–92.
- 36 22 Chapman SR, Fitzpatrick RW, Aladul MI. Knowledge, attitude and practice of healthcare professionals  
37 towards infliximab and insulin glargine biosimilars: result of a UK web-based survey. *BMJ Open* 2017;7:e016730.
- 38 23 Danese S, Fiorino G, Michetti P. Changes in Biosimilar Knowledge among European Crohn's Colitis  
39 Organization [ECCO] Members: An Updated Survey. *J Crohns Colitis* 2016;10(11):1362–5.
- 40 24 Danese S, Fiorino G, Michetti P. Viewpoint: Knowledge and viewpoints on biosimilar monoclonal antibodies  
41 among members of the European Crohn's and Colitis Organization. *J Crohns Colitis* 2014;8:1548–50.
- 42 25 O'Dolinar RO, Reilly MS. Biosimilars naming, label transparency and authority of choice - survey findings  
43 among European physicians. *GaBI J* 2014;3(2):58–62.
- 44 26 van der Overbeeke E, DE Beleyr B, de Hoon J, et al. Perception of Originator Biologics and Biosimilars: A  
45 survey among Belgian rheumatoid arthritis patients and rheumatologists. *BioDrugs* 2017;31:447–59.
- 46 27 Sullivan E, Piercy J, Waller J, et al. Assessing gastroenterologist and patient acceptance of biosimilars in  
47 ulcerative colitis and Crohn's disease across Germany. *PLoS One* 2017;14;12(4):e0175826.  
48  
49  
50  
51  
52  
53  
54  
55  
56  
57  
58  
59  
60

- 1  
2  
3 28 Waller J, Sullivan E, Piercy J. Assessing physician and patient acceptance of infliximab biosimilars in  
4 rheumatoid arthritis, ankylosing spondyloarthritis and psoriatic arthritis across Germany. *Patient Prefer Adher*  
5 2017;11:519–30.  
6  
7 29 Barsell A, Rengifo-Pardo M, Ehrlich A. A Survey Assessment of US Dermatologists' Perception of Biosimilars.  
8 *J Drugs Dermatol* 2017;16(6):612–5.  
9  
10 30 Cohen H, Beydoun D, Chien D, et al. Awareness, Knowledge, and Perceptions of Biosimilars Among  
11 Specialty Physicians. *Adv Ther* 2016;33:2160–72.  
12  
13 31 Felix A, Gupta A, Choen JP, et al. Barriers to market uptake of biosimilars in the US. *GaBI J* 2014;3(3):108–  
14 15.  
15  
16 32 Grabowski D, Henderson B, Lam D, et al. Attitudes towards subsequent entry biologics/biosimilars: A survey  
17 of Canadian rheumatologists. *Clin Rheumatol* 2015;34:1427–33.  
18  
19 33 Leonard E, Wascovich M, Oskuei S, et al. Factors Affecting Health Care Provider Knowledge and Acceptance  
20 of Biosimilar Medicines: A Systematic Review. *J Manag Care Spec Pharm*. 2019;25(1):102–12.  
21  
22 34 Reilly MS, Murby SP. A survey of Australian prescribers' views on the naming and substitution of biologicals.  
23 *GaBI J* 2017;8(3):107–13.  
24  
25 35 Hemmington A, Dalbeth N, Jarreett P, et al. Medical specialists' attitudes to prescribing biosimilars.  
26 *Pharmacoepidemiol Drug Saf* 2017;26:570–7.  
27  
28 36 Gewanter HL, Reilly MS. Prescribing practices for biosimilars: questionnaire survey findings from physicians in  
29 Argentina, Brazil, Colombia and Mexico. *GaBI J* 2015;4(4):161–6.  
30  
31 37 Farhat F, Othman A, el Karak F, et al. Review and results of a survey about biosimilars prescription and  
32 challenges in the Middle East and North Africa region. *Springer Plus* 2016;5(2113):1–9.  
33  
34 38 de Bekker-Grob EW, Ryan M, Gerard K. Discrete choice experiments in health economics: a review of the  
35 literature. *HealthEcon* 2012; 21:145–72.  
36  
37 39 Sipilä R, Helin-Salmivaara A, Korhonen MJ, et al. Change in antihypertensive drug prescribing after guideline  
38 implementation: a controlled before and after study. *BMC Fam Pract* 2011;12(87):1–12.  
39  
40 40 Solomon DH, Van Houten L, Glynn RJ, et al. Academic detailing to improve use of broad-spectrum  
41 antibiotics at an academic medical center. *Arch Intern Med* 2001;161(15):1897–902.  
42  
43 41 O'Brien MA, Rogers S, Jamtvedt G, et al. Educational outreach visits: effects on professional practice and  
44 health care outcomes. *Cochrane Database Syst Rev* 2007;17(4):CD000409  
45  
46 42 National Resource Center for Academic Detailing. Introductory Guide to Academic Detailing. Updated 2017.  
47 Accessed 16 Jul 2019: [www.narcad.org/uploads/5/7/9/5/57955981/introductory\\_guide\\_to\\_ad.pdf](http://www.narcad.org/uploads/5/7/9/5/57955981/introductory_guide_to_ad.pdf)  
48  
49 43 Simon SR, Rodriguez HP, Majumdar SR, et al. Economic analysis of a randomized trial of academic detailing  
50 interventions to improve use of antihypertensive medications. *J Clin Hypertens (Greenwich)* 2007;9(1):15–20.  
51  
52 44 Patel B, Afghan S. Effects of an educational outreach campaign (IMPACT) on depression management  
53 delivered to general practitioners in one primary care trust. *Ment Health Fam Med* 2009;6(3):155–62.  
54  
55 45 Moorkens E, Vulto AG, Huys I, et al. Policies for biosimilar uptake in Europe: An overview. *PLoS One*  
56 2017;12(12):e0190147.  
57  
58 46 Cook JW, McGrath MK, Dixon MD, et al. Academic oncology clinicians' understanding of biosimilars and  
59 information needed before prescribing. *Ther Adv Med Oncol* 2019;6(11):1758835918818335.  
60  
61 47 Cohen HP, Blauvelt A, Rifkin RM, et al. Switching Reference Medicines to Biosimilars: A Systematic Literature  
62 Review of Clinical Outcomes. *Drugs* 2018;78(4):463–78.

- 1  
2  
3 48 Mack A. Norway, biosimilars in different funding system. What works? GaBI J 2015;4(2):90–2.  
4  
5 49 Lunddahl B. Pharmacovigilance on biologicals and biosimilars: a Danish perspective. GaBI J 2016;5(3):123–4.  
6  
7 50 Rémuzat C, Kapuśniak A, Caban A, et al. Supply-side and demand-side policies for biosimilars: an overview  
8 in 10 European member states. J Mark Access Health Policy 2017;5(1):1307315.  
9  
10 51 Underhill C. Biosimilars and IBD: a switch programme using CT-P13. Clin Pharm 2016;8(9):266–70.  
11  
12 52 Flodmark C-E, Lilja K, Woehling H, et al. Switching from originator to biosimilar human growth hormone using  
13 dialogue teamwork: single-center experience from Sweden. Biol Ther 2013;3(1):35–43.  
14  
15 53 Thimmaraju PK, Rakshambikai R, Farista R, et al. Legislations on biosimilar interchangeability in the US and  
16 EU – developments far from visibility. Updated 2018. Accessed 16 Jul 2019: [www.gabionline.net/Sponsored-](http://www.gabionline.net/Sponsored-Articles/Legislations-on-biosimilar-interchangeability-in-the-US-and-EU-developments-far-from-visibility)  
17 [Articles/Legislations-on-biosimilar-interchangeability-in-the-US-and-EU-developments-far-from-visibility](http://www.gabionline.net/Sponsored-Articles/Legislations-on-biosimilar-interchangeability-in-the-US-and-EU-developments-far-from-visibility)  
18  
19 54 Cauchi R. State laws and legislation related to biologics medications and substitution of biosimilars. Updated  
20 2018. Accessed 16 Jul 2019: [www.ncsl.org/research/health/state-laws-and-legislation-related-to-biologic-](http://www.ncsl.org/research/health/state-laws-and-legislation-related-to-biologic-medications-and-substitution-of-biosimilars.aspx)  
21 [medications-and-substitution-of-biosimilars.aspx](http://www.ncsl.org/research/health/state-laws-and-legislation-related-to-biologic-medications-and-substitution-of-biosimilars.aspx)  
22  
23 55 Australian Government Department of Health. Biosimilar awareness initiative. Updated 2018. Accessed 16 Jul  
24 2019: [www.health.gov.au/internet/main/publishing.nsf/Content/biosimilar-awareness-initiative](http://www.health.gov.au/internet/main/publishing.nsf/Content/biosimilar-awareness-initiative)  
25  
26 56 Larkin H, Macdonald J, Lumsden R. Pharmacy-mediated substitution of biosimilars – a global survey  
27 benchmarking country substitution policies. GaBI J 2017;6(4):157–64.  
28  
29 57 Singh S. How to Conduct and Interpret Systematic Reviews and Meta-Analyses. Clin Transl Gastroenterol  
30 2017;8(5):e93.  
31  
32  
33  
34  
35  
36  
37  
38  
39  
40  
41  
42  
43  
44  
45  
46  
47  
48  
49  
50  
51  
52  
53  
54  
55  
56  
57  
58  
59  
60

1  
2  
3  
4  
5  
6  
7  
8  
9  
10  
11  
12  
13  
14  
15  
16  
17  
18  
19  
20  
21  
22  
23  
24  
25  
26  
27  
28  
29  
30  
31  
32  
33  
34  
35  
36  
37  
38  
39  
40  
41  
42  
43  
44  
45  
46  
47  
48  
49  
50  
51  
52  
53  
54  
55  
56  
57  
58  
59  
60

**FIGURE LEGENDS**

Figure 1. PRISMA flow chart explaining the study inclusion process.

For peer review only



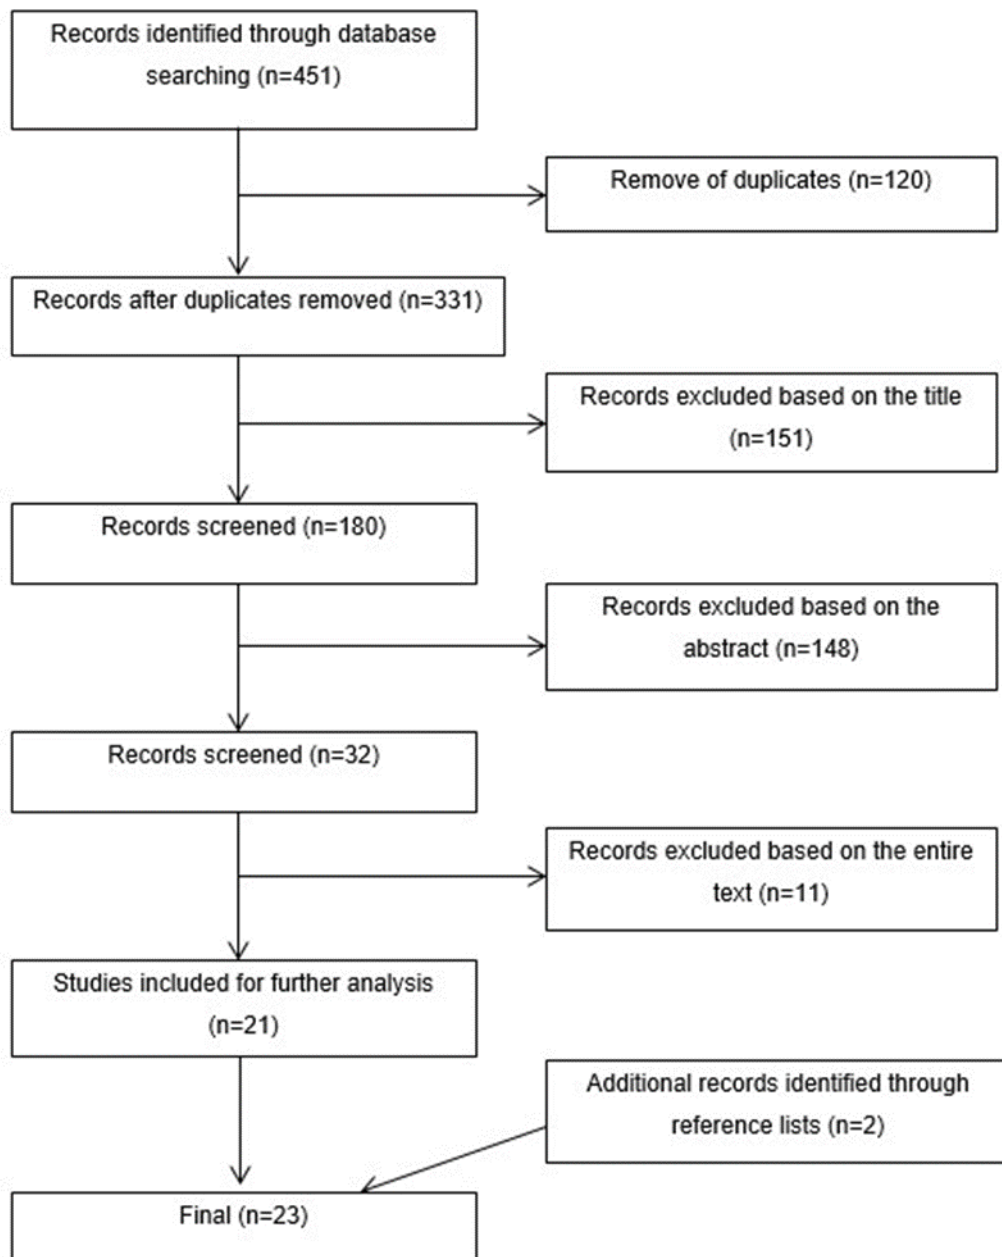

Figure 1. PRISMA flow chart explaining the study inclusion process.

## Appendix 1. Literature search approach.

| Database     | Search terms                                                                                                                                                                                                                                                                                                                                                                                                                                                                                                                                                                                                                                                                                                                                                                                                                                                                                                                                                                                                                                                                                                                                                                                                                                                                                                                                                                                                                                                                                                                                                                                                                 |
|--------------|------------------------------------------------------------------------------------------------------------------------------------------------------------------------------------------------------------------------------------------------------------------------------------------------------------------------------------------------------------------------------------------------------------------------------------------------------------------------------------------------------------------------------------------------------------------------------------------------------------------------------------------------------------------------------------------------------------------------------------------------------------------------------------------------------------------------------------------------------------------------------------------------------------------------------------------------------------------------------------------------------------------------------------------------------------------------------------------------------------------------------------------------------------------------------------------------------------------------------------------------------------------------------------------------------------------------------------------------------------------------------------------------------------------------------------------------------------------------------------------------------------------------------------------------------------------------------------------------------------------------------|
| MedLine Ovid | <p>(attitude* or stance* or opinion* or position* or orientat* or insight* or esteem* or estimat* or percepti* or belie* or decision* or decide* or determin* or prescrib* or chose* or choos* or choice* or guid* or recommend* or commission* or adopt* or accept* or uptak* best practice).mp AND (((physician.mp. or Physicians/) OR (clinician* or doctor* or specialist* or consultant*).mp.) AND (exp dermatology/ or exp internal medicine/ or exp endocrinology/ or exp gastroenterology/ or exp rheumatology/))</p> <p>OR (exp general practice/ or exp family practice/ or exp general practitioners/ or exp hospitalists/ or exp physicians, family/ or exp physicians, primary care/or physician.mp. or Physicians/ or (clinician* or doctor* or specialist* or consultant*).mp.) AND (exp DIABETES MELLITUS/ or diabetes.mp.)) AND (exp Biosimilar Pharmaceuticals/ or biosimilar*.mp.)</p> <p>(attitude* or stance* or opinion* or position* or orientat* or insight* or esteem* or estimat* or percepti* or belie* or decision* or decide* or determin* or prescrib* or chose* or choos* or choice* or guid* or recommend* or commission* or adopt* or accept* or uptak* best practice).mp AND (((Physicians/ or (physician* or clinician* or doctor* or specialist* or consultant*).mp.) AND (exp Biosimilar Pharmaceuticals/ or biosimilar*.mp.)</p>                                                                                                                                                                                                                                                       |
| Scopus       | <p>TITLE-ABS-KEY ( biosimilar* AND ( ( ( physician* OR clinician* OR doctor* OR specialist* OR consultant* ) W/20 ( rheumatology OR gastroenterology OR endocrinology OR dermatology OR diabetes OR "internal medicine" ) ) OR ( rheumatologist* OR gastroenterologist* OR endocrinologist* OR dermatologist* OR hospitalist OR "General Practitioner*" OR physicians W/2 family ) ) AND ( attitude* OR stance* OR opinion* OR position* OR orientat* OR insight* OR esteem* OR estimat* OR percepti* OR belie* OR decision* OR decide* OR determin* OR prescrib* OR choice* OR choos* OR chose* OR "best practice" OR guid* OR guide* OR recommend* OR commission* OR adopt* OR accept* OR uptak* ) ) AND ( LIMIT-TO ( SRCTYPE , "j " ) OR LIMIT-TO ( SRCTYPE , "p " ) ) AND ( LIMIT-TO ( DOCTYPE , "ar " ) OR LIMIT-TO ( DOCTYPE , "re " ) OR LIMIT-TO ( DOCTYPE , "cp " ) OR LIMIT-TO ( DOCTYPE , "ip " ) ) AND ( LIMIT-TO ( LANGUAGE , "English " ) )</p> <p>TITLE-ABS-KEY(biosimilar* AND ( physician* OR clinician* OR doctor* OR specialist* OR consultant* ) AND (attitude* OR stance* OR opinion* OR position* OR orientat* OR insight* OR esteem* OR estimat* OR percepti* OR belie* OR decision* OR decide* OR determin* OR prescrib* OR choice* OR choos* OR chose* OR "best practice" OR guid* OR guide* OR recommend* OR commission* OR adopt* OR accept* OR uptak*)) AND ( LIMIT-TO ( SRCTYPE,"j " ) OR LIMIT-TO ( SRCTYPE,"p " ) ) AND ( LIMIT-TO ( DOCTYPE,"ar " ) OR LIMIT-TO ( DOCTYPE,"re " ) OR LIMIT-TO ( DOCTYPE,"cp " ) OR LIMIT-TO ( DOCTYPE,"ip " ) ) AND ( LIMIT-TO ( LANGUAGE,"English " ) )</p> |

## Appendix 2. Quality assessment protocol.

Date:

Evaluator:

Authors:

Title:

| Design                                                                                                 |             |             |            |       | Yes |
|--------------------------------------------------------------------------------------------------------|-------------|-------------|------------|-------|-----|
| Meta-analysis                                                                                          |             |             |            |       |     |
| Randomized controlled trial                                                                            |             |             |            |       |     |
| Systematic review                                                                                      |             |             |            |       |     |
| Quantitative study: type (survey, pilot, other)                                                        |             |             |            |       |     |
| Qualitative study: type (interview, focus group, other)                                                |             |             |            |       |     |
| Other, what?                                                                                           |             |             |            |       |     |
|                                                                                                        | Yes<br>(1p) | Partly (½p) | No<br>(0p) | Notes |     |
| Aim and context                                                                                        |             |             |            |       |     |
| 1 Is there an explicit aim?                                                                            |             |             |            |       |     |
| 2 Is the context described?                                                                            |             |             |            |       |     |
| Methodology                                                                                            |             |             |            |       |     |
| 3 Is the data collection described accurately and is it repeatable?                                    |             |             |            |       |     |
| 4 Is the sample selection preventative/relevant/not strategic (sample selected intentionally)?         |             |             |            |       |     |
| 5 Is the dropout described?                                                                            |             |             |            |       |     |
| 6 Is the data analysis described accurately and is it repeatable?                                      |             |             |            |       |     |
| 7 Are the (statistical or other) methods adequate and applicable in relation to the aims of the study? |             |             |            |       |     |
| Results                                                                                                |             |             |            |       |     |
| 8 Are the findings logic, reliable and clearly displayed?                                              |             |             |            |       |     |
| Discussion and conclusions                                                                             |             |             |            |       |     |
| 9 Is there a critical discussion on the findings?                                                      |             |             |            |       |     |
| 10 Is there a critical discussion on the method?                                                       |             |             |            |       |     |
| 11 Is there a new value?                                                                               |             |             |            |       |     |
| 12 Are the aims of the study met in the results and findings of the study?                             |             |             |            |       |     |
| 13 Are the instruments valid?                                                                          |             |             |            |       |     |
| 14 Are the instruments reliable?                                                                       |             |             |            |       |     |
| Ethics                                                                                                 |             |             |            |       |     |
| 15 Is there an ethical discussion?                                                                     |             |             |            |       |     |
| 16 Are the authors non-dependable and free of any conflicts of interest?                               |             |             |            |       |     |
| 17 Did the participants participate without receiving a fee?                                           |             |             |            |       |     |
| TOTAL POINTS                                                                                           |             |             |            |       |     |

Quality assessment (rounded upwards when necessary): high:  $\geq 15$  yes, moderate: 12-14.5 yes, low:  $< 12$  yes

Quality assessment protocol adapted from the protocols of Åkesson et al. (2006), Tong et al. (2007), Joanna Briggs Institute (2014) and Swedish Agency for Health Technology Assessment and Assessment of Social Services (2016).

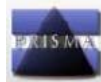

# PRISMA 2009 Checklist

1  
2  
3  
4  
5  
6  
7  
8  
9  
10  
11  
12  
13  
14  
15  
16  
17  
18  
19  
20  
21  
22  
23  
24  
25  
26  
27  
28  
29  
30  
31  
32  
33  
34  
35  
36  
37  
38  
39  
40  
41  
42  
43  
44  
45  
46  
47

| Section/topic                      | #  | Checklist item                                                                                                                                                                                                                                                                                              | Reported on section (in the main document without)                                                    |
|------------------------------------|----|-------------------------------------------------------------------------------------------------------------------------------------------------------------------------------------------------------------------------------------------------------------------------------------------------------------|-------------------------------------------------------------------------------------------------------|
| <b>TITLE</b>                       |    |                                                                                                                                                                                                                                                                                                             |                                                                                                       |
| Title                              | 1  | Identify the report as a systematic review, meta-analysis, or both.                                                                                                                                                                                                                                         | Title page, p1                                                                                        |
| <b>ABSTRACT</b>                    |    |                                                                                                                                                                                                                                                                                                             |                                                                                                       |
| Structured summary                 | 2  | Provide a structured summary including, as applicable: background; objectives; data sources; study eligibility criteria, participants, and interventions; study appraisal and synthesis methods; results; limitations; conclusions and implications of key findings; systematic review registration number. | Title page, p1, according to BMJ Open abstract structure                                              |
| <b>INTRODUCTION</b>                |    |                                                                                                                                                                                                                                                                                                             |                                                                                                       |
| Rationale                          | 3  | Describe the rationale for the review in the context of what is already known.                                                                                                                                                                                                                              | Introduction, starting from p2                                                                        |
| Objectives                         | 4  | Provide an explicit statement of questions being addressed with reference to participants, interventions, comparisons, outcomes, and study design (PICOS).                                                                                                                                                  | Objectives (at the last paragraph of the Introduction), p2                                            |
| <b>METHODS</b>                     |    |                                                                                                                                                                                                                                                                                                             |                                                                                                       |
| Protocol and registration          | 5  | Indicate if a review protocol exists, if and where it can be accessed (e.g., Web address), and, if available, provide registration information including registration number.                                                                                                                               | Material and methods, paragraph: Quality assessment, with an appendix and appropriate referencing, p3 |
| Eligibility criteria               | 6  | Specify study characteristics (e.g., PICOS, length of follow-up) and report characteristics (e.g., years considered, language, publication status) used as criteria for eligibility, giving rationale.                                                                                                      | Tables 1 and 2                                                                                        |
| Information sources                | 7  | Describe all information sources (e.g., databases with dates of coverage, contact with study authors to identify additional studies) in the search and date last searched.                                                                                                                                  | Appendix 1 in the Supplementary Files                                                                 |
| Search                             | 8  | Present full electronic search strategy for at least one database, including any limits used, such that it could be repeated.                                                                                                                                                                               | Appendix 1 in the Supplementary Files                                                                 |
| Study selection                    | 9  | State the process for selecting studies (i.e., screening, eligibility, included in systematic review, and, if applicable, included in the meta-analysis).                                                                                                                                                   | Material and methods: Literature search, p2–3 and Table 1, p3                                         |
| Data collection process            | 10 | Describe method of data extraction from reports (e.g., piloted forms, independently, in duplicate) and any processes for obtaining and confirming data from investigators.                                                                                                                                  | Material and methods: Data extraction and analysis, p3                                                |
| Data items                         | 11 | List and define all variables for which data were sought (e.g., PICOS, funding sources) and any assumptions and simplifications made.                                                                                                                                                                       | Material and methods: Data extraction and analysis, p3                                                |
| Risk of bias in individual studies | 12 | Describe methods used for assessing risk of bias of individual studies (including specification of whether this was done at the study or outcome level), and how this information is to be used in any data synthesis.                                                                                      | Material and methods: Quality assessment, p3 and Table 3                                              |
| Summary measures                   | 13 | State the principal summary measures (e.g., risk ratio, difference in means).                                                                                                                                                                                                                               | Not applicable                                                                                        |
| Synthesis of results               | 14 | Describe the methods of handling data and combining results of studies, if done, including measures of consistency (e.g., $I^2$ ) for each meta-analysis.                                                                                                                                                   | Not applicable                                                                                        |

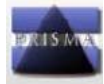

# PRISMA 2009 Checklist

Page 1 of 2

| Section/topic                 | #  | Checklist item                                                                                                                                                                                           | Reported on section                     |
|-------------------------------|----|----------------------------------------------------------------------------------------------------------------------------------------------------------------------------------------------------------|-----------------------------------------|
| Risk of bias across studies   | 15 | Specify any assessment of risk of bias that may affect the cumulative evidence (e.g., publication bias, selective reporting within studies).                                                             | Table 3                                 |
| Additional analyses           | 16 | Describe methods of additional analyses (e.g., sensitivity or subgroup analyses, meta-regression), if done, indicating which were pre-specified.                                                         | Not applicable                          |
| <b>RESULTS</b>                |    |                                                                                                                                                                                                          |                                         |
| Study selection               | 17 | Give numbers of studies screened, assessed for eligibility, and included in the review, with reasons for exclusions at each stage, ideally with a flow diagram.                                          | Figure 1                                |
| Study characteristics         | 18 | For each study, present characteristics for which data were extracted (e.g., study size, PICOS, follow-up period) and provide the citations.                                                             | Table 2                                 |
| Risk of bias within studies   | 19 | Present data on risk of bias of each study and, if available, any outcome level assessment (see item 12).                                                                                                | Table 3                                 |
| Results of individual studies | 20 | For all outcomes considered (benefits or harms), present, for each study: (a) simple summary data for each intervention group (b) effect estimates and confidence intervals, ideally with a forest plot. | Not applicable                          |
| Synthesis of results          | 21 | Present results of each meta-analysis done, including confidence intervals and measures of consistency.                                                                                                  | Not applicable                          |
| Risk of bias across studies   | 22 | Present results of any assessment of risk of bias across studies (see item 15).                                                                                                                          | Results: Quality assessment, Table 3    |
| Additional analysis           | 23 | Give results of additional analyses, if done (e.g., sensitivity or subgroup analyses, meta-regression [see item 16]).                                                                                    | Not applicable                          |
| <b>DISCUSSION</b>             |    |                                                                                                                                                                                                          |                                         |
| Summary of evidence           | 24 | Summarize the main findings including the strength of evidence for each main outcome; consider their relevance to key groups (e.g., healthcare providers, users, and policy makers).                     | Discussion, p14 onwards, Tables 2 and 3 |
| Limitations                   | 25 | Discuss limitations at study and outcome level (e.g., risk of bias), and at review-level (e.g., incomplete retrieval of identified research, reporting bias).                                            | Discussion, p14 onwards                 |
| Conclusions                   | 26 | Provide a general interpretation of the results in the context of other evidence, and implications for future research.                                                                                  | Conclusions, p14 onwards                |
| <b>FUNDING</b>                |    |                                                                                                                                                                                                          |                                         |
| Funding                       | 27 | Describe sources of funding for the systematic review and other support (e.g., supply of data); role of funders for the systematic review.                                                               | Funding, p15                            |

From: Moher D, Liberati A, Tetzlaff J, Altman DG, The PRISMA Group (2009). Preferred Reporting Items for Systematic Reviews and Meta-Analyses: The PRISMA Statement. PLoS Med 6(7): e1000097. doi:10.1371/journal.pmed1000097

For more information, visit: [www.prisma-statement.org](http://www.prisma-statement.org).

Page 2 of 2

For peer review only - <http://bmjopen.bmj.com/site/about/guidelines.xhtml>

# BMJ Open

## Physicians' perceptions on the uptake of biosimilars - A systematic review

|                                 |                                                                                                                                                                                                                                                                                                                                                                   |
|---------------------------------|-------------------------------------------------------------------------------------------------------------------------------------------------------------------------------------------------------------------------------------------------------------------------------------------------------------------------------------------------------------------|
| Journal:                        | <i>BMJ Open</i>                                                                                                                                                                                                                                                                                                                                                   |
| Manuscript ID                   | bmjopen-2019-034183.R2                                                                                                                                                                                                                                                                                                                                            |
| Article Type:                   | Original research                                                                                                                                                                                                                                                                                                                                                 |
| Date Submitted by the Author:   | 03-Mar-2020                                                                                                                                                                                                                                                                                                                                                       |
| Complete List of Authors:       | Sarnola, Kati; Finnish Medicines Agency Fimea, Assessment of Pharmacotherapies<br>Merikoski, Merja; City of Kuopio; Finnish Medicines Agency Fimea, Assessment of Pharmacotherapies<br>Jyrkka, Johanna; Finnish Medicines Agency Fimea, Assessment of Pharmacotherapies<br>Hämeen-Anttila, Katri; Finnish Medicines Agency Fimea, Assessment of Pharmacotherapies |
| <b>Primary Subject Heading</b>: | Health policy                                                                                                                                                                                                                                                                                                                                                     |
| Secondary Subject Heading:      | Health economics                                                                                                                                                                                                                                                                                                                                                  |
| Keywords:                       | biosimilar, biologic medicine, physician, perception                                                                                                                                                                                                                                                                                                              |
|                                 |                                                                                                                                                                                                                                                                                                                                                                   |

SCHOLARONE™  
Manuscripts



I, the Submitting Author has the right to grant and does grant on behalf of all authors of the Work (as defined in the below author licence), an exclusive licence and/or a non-exclusive licence for contributions from authors who are: i) UK Crown employees; ii) where BMJ has agreed a CC-BY licence shall apply, and/or iii) in accordance with the terms applicable for US Federal Government officers or employees acting as part of their official duties; on a worldwide, perpetual, irrevocable, royalty-free basis to BMJ Publishing Group Ltd ("BMJ") its licensees and where the relevant Journal is co-owned by BMJ to the co-owners of the Journal, to publish the Work in this journal and any other BMJ products and to exploit all rights, as set out in our [licence](#).

The Submitting Author accepts and understands that any supply made under these terms is made by BMJ to the Submitting Author unless you are acting as an employee on behalf of your employer or a postgraduate student of an affiliated institution which is paying any applicable article publishing charge ("APC") for Open Access articles. Where the Submitting Author wishes to make the Work available on an Open Access basis (and intends to pay the relevant APC), the terms of reuse of such Open Access shall be governed by a Creative Commons licence – details of these licences and which [Creative Commons](#) licence will apply to this Work are set out in our licence referred to above.

Other than as permitted in any relevant BMJ Author's Self Archiving Policies, I confirm this Work has not been accepted for publication elsewhere, is not being considered for publication elsewhere and does not duplicate material already published. I confirm all authors consent to publication of this Work and authorise the granting of this licence.

1

## Physicians' perceptions on the uptake of biosimilars - A systematic review

Kati Sarnola<sup>1\*</sup>, Merja Merikoski<sup>1,2</sup>, Johanna Jyrkkä<sup>1</sup>, Katri Hämeen-Anttila<sup>1</sup>

<sup>1</sup> Finnish Medicines Agency, P.O.Box 55, 000034 FIMEA, Finland

<sup>2</sup> City of Kuopio, Finland

\* Corresponding author: Kati Sarnola, kati.sarnola@gmail.com, +358 29 522 35 24, ORCID: 0000-0003-1300-7482

### WORD COUNT

Word count (excluding title page, abstract, references, figures, tables and appendices): 3387

### ABSTRACT

**Objectives:** Examine physicians' perceptions on the uptake of biosimilars

**Design:** Systematic review

**Setting:** Literature search in MedLine Ovid and Scopus databases at the end of 2018. Search resulted to 451 studies and after removal of duplicates, to 331 studies. Two researchers examined studies based on the title, abstract and the entire text. Twenty scientific original studies written in English that addressed physicians' perceptions on the uptake of biosimilars were selected for further analysis. Additionally, the references of included studies were screened and three studies were handpicked and included in this review. Data of these 23 studies were extracted study-by-study basis. All publications were quality assessed by two researchers. In this review, higher emphasis was given to publications with high-assessed quality.

**Results:** Majority of selected studies were conducted in Europe and they commonly utilized short surveys. Physicians' familiarity of biosimilars varied: 49–76% were familiar with biosimilars and 2–25% did not know what biosimilars were, percentages varying from study to study. Measured knowledge appeared weaker compared to self-assessed knowledge. Physicians' perceptions towards biosimilars also varied: 54–94% were confident prescribing biosimilars, while 65–67% had concerns regarding these medicines. Physicians seem to prefer originator products to biosimilars and prescribe biosimilars mainly for biologic-naïve patients. Physicians consider cost savings and lower price in comparison to the originator biologic medicine as main advantages of biosimilars, while doubts often relate to safety, efficacy and immunogenicity. 64–95% of physicians have negative perceptions towards pharmacist-led substitution of biologic medicines.

**Conclusions:** Physicians' knowledge on and attitudes towards biosimilars vary. Although physicians had positive attitudes towards biosimilars, prescribing is limited, especially for patients that are already treated with biologic medicines. Perceptions towards the pharmacist-led substitution of biologic medicines are often negative. Education and national recommendations for switching and substitution of biologic medicines are needed to support the uptake of biosimilars.

### STRENGTHS AND LIMITATIONS OF THIS STUDY

- This is the first systematic review conducted solely on physicians' perceptions regarding the uptake of biosimilars
- The literature search was conducted with the help of an experienced information specialist
- Publications selected for this review were quality evaluated by two researchers independently
- The quality evaluation protocol was compiled from four existing evaluation protocols
- The data in the studies included in this review was mainly collected before



2

## KEYWORDS

biosimilar, biologic medicine, physician, perception, systematic review

## 1 INTRODUCTION

Biologic medicines consist of one or multiple biologic active substances and are often manufactured through biotechnology<sup>1-2</sup>. Biologic medicines were first developed mainly for rare diseases, but have thereafter improved the treatment of many common diseases, such as diabetes, arthritis and psoriasis<sup>1</sup>. The flipside of this transformation are high costs of biologic medicines that have contributed to increased medical costs globally<sup>3</sup>.

Biosimilars are biologic medicines highly similar to the originator biologic medicines with same standards on the quality, safety and efficacy of the products<sup>2-4</sup>. Biosimilars have no clinically meaningful differences to the existing reference product. Biosimilars are not regarded as generic medicines due to the complex manufacturing process and the natural variability between manufacturing batches of biologic medicines. The comparability of the product to the reference product has to be demonstrated, however, clinical trials are not required. As a result, biosimilars can be brought to the market at a lower cost in comparison to the originator biologic product. The uptake of biosimilars could lead to healthcare cost savings and better patient access to costly biologic therapies<sup>5</sup>. Until the end of 2018, 50 biosimilars have received marketing authorisation in Europe and 15 in the United States<sup>6-7</sup>.

Regardless of their demonstrated comparability and their cost-saving potential, biosimilars have not fully penetrated the market of biologic medicines. The European Union holds 80% of the global biosimilar market, but biosimilars constitute only 1% of total sales of biologic medicines<sup>8-9</sup>. It has been stated that the decisions to select biologic medicines may be either policy driven or made by individual physicians, which has raised a need to assess the prescribing of biosimilars in a critical manner<sup>10-11</sup>. Physicians' reluctance to prescribe biosimilars may restrain potential savings in medical costs that could enable offering biologic treatment to larger patient populations and providing more cost-effective treatment, as similar benefits could be gained by using less expensive treatments. Therefore, it is vital to study physicians' attitudes towards and perceptions on the uptake of biosimilars. Published information on the topic is somewhat contradictory. A previous systematic review focused on health care providers' knowledge, perceptions and prescribing behaviors of biosimilar medicines<sup>12</sup>. As the role of physicians is critical in the uptake of biosimilars and gaining the cost-saving potential, a wider understanding on physicians' perceptions on the uptake of biosimilars with a critical quality evaluation of the published literature was needed. Thus, the aim of this systematic review was to examine physicians' perceptions on the uptake of biosimilars.

## 2 MATERIAL AND METHODS

### Literature search

A systematic literature search was conducted in MedLine Ovid and Scopus databases at the end of 2018. Selected databases provide a comprehensive selection of scientific publications from the disciplines of pharmacy and medicine. The systematic search strategy (**Appendix 1**) was constructed by the research group and the search was conducted by an experienced information specialist.

The initial search resulted in 451 studies. After removal of duplicates (n = 120), 331 studies remained. Studies were examined based on the title, abstract and the entire text by two researchers independently (KS and MM). Of the 331 studies, 152 were excluded based on the title, 148 based on the abstract and 11 based on the entire text. At each stage, researchers shared their views of the studies, discussed on possible differences on opinions and

reached a consensus opinion based on the discussion. The inclusion and exclusion criteria of this systematic review are presented in **Table 1**. A total of 20 publications were selected for further analysis. Furthermore, the reference lists of these 21 articles were screened and three further articles that met the inclusion criteria were handpicked and included in this review, which brings the final number of included studies being 23. The PRISMA flow chart explaining the study inclusion process is presented in **Figure 1**.

Table 1. Inclusion and exclusion criteria of studies of this systematic review.

| Inclusion criteria                                                                                                                                                                                                                                                                                                                                                                                                                                                   | Exclusion criteria                                                                                                                                                                                                                                                                                                                                                                                                                                                                                                                                                                                                        |
|----------------------------------------------------------------------------------------------------------------------------------------------------------------------------------------------------------------------------------------------------------------------------------------------------------------------------------------------------------------------------------------------------------------------------------------------------------------------|---------------------------------------------------------------------------------------------------------------------------------------------------------------------------------------------------------------------------------------------------------------------------------------------------------------------------------------------------------------------------------------------------------------------------------------------------------------------------------------------------------------------------------------------------------------------------------------------------------------------------|
| <ul style="list-style-type: none"> <li>Original primary studies</li> <li>English language</li> <li>Investigating physicians' perceptions on the uptake of biosimilars (physicians in particular or at least 45% of physicians among other healthcare professionals, although only physicians perceptions were taken into account in this review)</li> <li>Publications on the physicians' perceptions on the automatic substitution of biologic medicines</li> </ul> | <ul style="list-style-type: none"> <li>Other than original primary studies, such as reviews, conference papers, consensus papers, commentaries and letters to editors</li> <li>Other language than English</li> <li>Investigating other healthcare professionals' perceptions on the uptake of biosimilars or publications with less than 45% of physicians of all participants involved or in which the physicians' perceptions are not separated in the results of the study</li> <li>Publications on the physicians' perceptions on the automatic or generic substitution of other medicines than biologics</li> </ul> |

### Quality assessment

Each of the 23 selected studies was concisely reviewed. Quality assessment was conducted according to a protocol adapted from the protocols of Åkesson et al. (2006), Tong et al. (2007), Joanna Briggs Institute (2014) and Swedish Agency for Health Technology Assessment and Assessment of Social Services (2016)<sup>13–16</sup> (**Appendix 2**). Adapted protocol was developed and used in the quality evaluation, because the study designs of the included studies varied and there was no single protocol that was suitable for evaluating the studies in a concise manner. Two researchers conducted quality assessments individually and then compared their reviews. Differences in opinions (n = 6) were discussed and final evaluation was set in consensus. In the Results section of this systematic review, studies that were assessed as having high quality are emphasized in comparison to the results of those with moderate or low assessed quality.

### Data extraction and analysis

A meta-analysis was not conducted due to the various methods and both qualitative and quantitative approaches applied in the studies that were included in this review. The following information was extracted from all included studies: general information (authors, year of publication, and country of publication), aims, methods and results. In regards to results, seven topics for data extraction were identified based on the topics discussed in the publications and on the discussion in the research group. These topics were: physicians' 1) self-rated knowledge of biosimilars, 2) measured knowledge on biosimilars, 3) information sources of biologic medicines, 4) attitudes towards and experienced advantages and disadvantages of biosimilars, 5) actions in the initiation of biosimilars for biologic-naïve patients, 6) actions in the switches between originators and biosimilars for patients already treated with biologic medicines and 7) thoughts on pharmacist-led substitution of biologic medicines. In the Results section of this systematic review, these seven topics are presented within four broader themes: physicians' 1) self-rated and measured knowledge on biosimilars and information sources on biologic medicines, 2) attitudes towards and experienced advantages and disadvantages of biosimilars, 3) perceptions on the treatment initiations with biosimilars and on the switches between originator biologic medicines and biosimilars and 4) attitudes towards

4

1  
2  
3 pharmacist-led substitution of biologic medicines. All percentages presented in the article refer to the percentages  
4 shown in the included studies of physicians with a certain opinion. If more than one study investigated the topic, a  
5 range of percentages in these studies are shown.  
6  
7  
8

### 9 **3 RESULTS**

#### 10 **Study characteristics**

11 Physicians' perceptions on biosimilars have been studied mainly in Europe (n = 16)<sup>10, 17–30</sup> and North America (n =  
12 4)<sup>31–34</sup>. Single studies have been conducted in Australia (n = 1)<sup>35</sup>, New Zealand (n = 1)<sup>36</sup>, Central and South  
13 America (n = 1)<sup>37</sup> and in multiple African, European and Middle Eastern countries (n = 1)<sup>38</sup> (**Table 2**). All studies  
14 were published between 2014 and 2019, but majority of them (n = 20)<sup>10, 17, 20–22, 24–34, 35–38</sup> in 2017 or before. The  
15 data presented in the studies were collected between 2013 and 2017. Most of the 23 selected publications utilized  
16 surveys, typically web-based questionnaires with 11–22 questions, or fully structured short interviews (n = 17)<sup>10,  
17–18, 22–27, 30–32, 34, 35–38</sup>. In addition there was a qualitative interview study<sup>19</sup> and real-world cross-sectional studies (n  
18 = 2)<sup>28–29</sup>, in which physicians filled a survey form and reported their prescribing and after, recruited patients that  
19 also filled a questionnaire form to provide information on how reported prescribing actualized in practice. There  
20 were also discrete choice method surveys (n = 2)<sup>20–21</sup>, in which prescribers were given a hypothetical scenario and  
21 possible treatment options, and they were asked to choose the alternative they prefer<sup>39</sup>. Furthermore, one literature  
22 review with survey on the market uptake of biosimilars<sup>33</sup>, has been conducted.  
23  
24  
25  
26  
27

#### 28 **Quality assessment**

29 Of 23 included studies, seven<sup>10, 18, 20–21, 23, 27, 34</sup> were evaluated to be high, six<sup>19, 22, 28–31</sup> to be moderate and nine<sup>17, 24–  
30 26, 32–33, 35, 37–38</sup> to be low in quality based on criteria used in this review (**Table 3**). Publications evaluated to be high  
31 in quality often included well-described and logically presented methods and results sections and a critical  
32 discussion section, of which those evaluated to be moderate or low quality typically lacked. In general, the quality  
33 assessment revealed that there is a lack of valid instruments and studies utilizing qualitative research methods.  
34  
35  
36

#### 37 **Self-rated and measured knowledge on biosimilars and sources of information (n = 18)**

38 There is variation on the physicians' self-rated knowledge on biosimilars (**Table 2**). In individual studies, physicians  
39 consider they have at least a basic understanding of the topic: 5–44% of the physicians reported that they feel very  
40 familiar and 49–76% that they feel familiar with biosimilars<sup>10, 24, 26–27, 31, 34, 35–36</sup>. In these studies 2–25% of the  
41 physicians reported that they do not know what biosimilars are. In individual studies, physicians with more years of  
42 practice and those with specialisation consider themselves more familiar with biosimilars in comparison to less  
43 experienced colleagues and general practitioners<sup>10, 22, 34</sup>.  
44  
45  
46

47 Although physicians self-rate that they generally feel familiar with biosimilars, the measured knowledge on the topic  
48 appears weaker (**Table 2**). 18–66% of the physicians incorrectly described biosimilars as generic medicines and  
49 31–72% as structurally identical to originator medicines<sup>10, 22–23, 25, 32, 34–35, 37–38</sup>. However, in three studies, 76–100%  
50 of physicians were able to share the complete definition of a biosimilar correctly<sup>18–19, 27</sup>.  
51  
52  
53  
54  
55  
56  
57  
58  
59  
60

Table 2. Characteristics of the 23 studies included in this systematic review.

| Reference (Country or region)                         | Aims and methods                                                                                                                                                                                                                                                                                                                                                                                                                               | Results                                                                                                                                                                                                              |                                                                                                                               |                                                                                                                                                                          |                                                                                                                                                                                                                                                                                                                                                                                                                                                                                                                                                                                                                                                                                                                                                                                                                                                                                                                                                                                                                                                             |                                                                                                                                                                                                                                                                                                                                                                                                                                                                                                |                                                                                                                                                                                                                                                                                                                                                                                                                                  |                                                                                                                                                                                                                      |
|-------------------------------------------------------|------------------------------------------------------------------------------------------------------------------------------------------------------------------------------------------------------------------------------------------------------------------------------------------------------------------------------------------------------------------------------------------------------------------------------------------------|----------------------------------------------------------------------------------------------------------------------------------------------------------------------------------------------------------------------|-------------------------------------------------------------------------------------------------------------------------------|--------------------------------------------------------------------------------------------------------------------------------------------------------------------------|-------------------------------------------------------------------------------------------------------------------------------------------------------------------------------------------------------------------------------------------------------------------------------------------------------------------------------------------------------------------------------------------------------------------------------------------------------------------------------------------------------------------------------------------------------------------------------------------------------------------------------------------------------------------------------------------------------------------------------------------------------------------------------------------------------------------------------------------------------------------------------------------------------------------------------------------------------------------------------------------------------------------------------------------------------------|------------------------------------------------------------------------------------------------------------------------------------------------------------------------------------------------------------------------------------------------------------------------------------------------------------------------------------------------------------------------------------------------------------------------------------------------------------------------------------------------|----------------------------------------------------------------------------------------------------------------------------------------------------------------------------------------------------------------------------------------------------------------------------------------------------------------------------------------------------------------------------------------------------------------------------------|----------------------------------------------------------------------------------------------------------------------------------------------------------------------------------------------------------------------|
|                                                       |                                                                                                                                                                                                                                                                                                                                                                                                                                                | Self-rated knowledge                                                                                                                                                                                                 | Measured knowledge                                                                                                            | Information sources                                                                                                                                                      | Attitudes towards and experienced advantages and disadvantages of biosimilars                                                                                                                                                                                                                                                                                                                                                                                                                                                                                                                                                                                                                                                                                                                                                                                                                                                                                                                                                                               | Initiation of biosimilars (biologic-naïve patients)                                                                                                                                                                                                                                                                                                                                                                                                                                            | Switches between originators and biosimilars (patients already treated with biologics)                                                                                                                                                                                                                                                                                                                                           | Pharmacist-led substitution of biologic medicines                                                                                                                                                                    |
| Akhmetov et al. 2015 <sup>17</sup> (Ukraine)          | Endocrinologists', oncologists', nephrologists', immunologists' and rheumatologists' awareness of biosimilars<br><br>Short interviews with eight close-ended questions, including 6 Likert-type items (n = 82), time of the study not reported                                                                                                                                                                                                 | Low to medium levels (not reported more specifically) of biosimilar awareness on a 1-5 scale, where 1=low and 5=high<br><br>Endocrinologists and nephrologists had higher levels of awareness than other respondents | N/A                                                                                                                           | Peer-reviewed journal articles (n = 35), internet (n = 31), medical conferences (n = 20), popular press (n = 9), key-opinion leaders (n = 3), drug manufacturers (n = 2) | On a 1-5 scale, likelihood of prescribing biosimilars: 68% average (specific numbers not reported), 23% below average and 9% above average<br><br>Majority (n not reported) are likely to try biosimilars in small batches, and then gradually move to larger groups of patients, endocrinologists and nephrologists showing the greatest interest<br><br>Facilitators of prescribing: 39% cost advantage, 22% certification of safety by EMA or FDA, 22% certification of efficacy by EMA or FDA, 10% propitiousness of the Cabinet of Ministers and 7% trust towards European, American and Japanese biotech companies as importers<br><br>Majority (n not reported) required 40-50% lower price for biosimilars than original biologics, endocrinologists typically accepting 20-30% discount in comparison to rheumatologists and oncologists that anticipated over 50% discount                                                                                                                                                                        | N/A                                                                                                                                                                                                                                                                                                                                                                                                                                                                                            | N/A                                                                                                                                                                                                                                                                                                                                                                                                                              | N/A                                                                                                                                                                                                                  |
| Aladul et al. 2019 <sup>18</sup> (the United Kingdom) | Knowledge and attitudes of healthcare professionals (n = 150 dermatologists, diabetologists, gastroenterologists and rheumatologists) towards infliximab and insulin glargine biosimilars<br><br>Web-based survey via selected medical associations between August 2016 and January 2017                                                                                                                                                       | 80% were aware that biosimilars were available on their local formulary                                                                                                                                              | 76% correctly considered biosimilars as copies of originators                                                                 | N/A                                                                                                                                                                      | 91% considered robust pharmacovigilance studies and 84% the costs as the most important influencer of their prescribing of biosimilars                                                                                                                                                                                                                                                                                                                                                                                                                                                                                                                                                                                                                                                                                                                                                                                                                                                                                                                      | 22% had major concerns on the efficacy and 14% on the safety of biosimilars that prevented them of starting a biosimilar                                                                                                                                                                                                                                                                                                                                                                       | 50% had major concerns on the efficacy and 34% on the safety of biosimilars in the switches                                                                                                                                                                                                                                                                                                                                      | N/A                                                                                                                                                                                                                  |
| Aladul et al. 2018 <sup>19</sup> (the United Kingdom) | Perceptions of consultants with specialities of diabetes mellitus, ulcerative colitis, Crohn's disease, rheumatoid arthritis, ankylosing spondylitis and psoriatic arthritis (n = 10) towards biosimilar infliximab, etanercept and insulin glargine and potential barriers and facilitators to their prescribing<br><br>Semi-structured interviews of purposive convenience sample of West Midlands hospital staff between June-November 2017 | N/A                                                                                                                                                                                                                  | All interviewees expressed an understanding of the concept of biosimilars and believed biosimilars were copies of originators | Conferences, pharmaceutical industry representatives, scientific journals and colleagues                                                                                 | Majority of rheumatologists and diabetologists (n not reported) would prescribe the reference product if the prices of the reference product and the biosimilar are equal<br><br>Gastroenterologists expressed more confidence and fewer concerns than other specialists, stating that indication extrapolation had previously been the major obstacle in the biosimilar uptake, but that it had been overcome<br><br>Majority of rheumatologists (n not reported) had concerns on indication extrapolation, considering their patients are very sensitive with higher multimorbid risks. Some rheumatologists (n not reported) openly declared being mistrustful on biosimilars<br><br>Facilitators of prescribing were information from societies, authorities and national registries. Barriers of prescribing were unexpected adverse effects or increase in side effects, patients' reluctance on using biosimilars, complicated, unsuitable or non-user-friendly administration device, unavailability of dose strengths in comparison to originators | Majority (n not reported) were content to initiate biosimilars<br><br>Minority of rheumatologists and diabetologists (n not reported) felt under pressure to initiate new patients with biosimilars by their organization<br><br>Two rheumatologists were happier to initiate biosimilars rather than switching                                                                                                                                                                                | All gastroenterologists (n = 7) and a minority of rheumatologists (n not reported) were content to switch patients from reference products to a biosimilar<br><br>All those that were content with switching considered that patients should be given the choice between the products<br><br>Majority of all physicians (n not reported) felt multiple switching based on cost reasons irrational                                | Majority (n not reported) has negative view on the pharmacist-led substitution of biologic medicines<br><br>Minority (n not reported) considered that automatic substitution would be accepted in the next few years |
| Baji et al. 2016a <sup>20</sup> (Hungary)             | Gastroenterologists' treatment preferences in ulcerative colitis<br><br>Discrete choice experiment survey (in which prescribers are given hypothetical scenario and possible treatment options, and they are asked to choose the alternative they prefer <sup>20</sup> ) in a Hungarian professional society meeting in 2014 (n = 51)                                                                                                          | N/A                                                                                                                                                                                                                  | N/A                                                                                                                           | N/A                                                                                                                                                                      | 20% had no concerns on biosimilars, 67% had some concerns on efficacy and/or safety and 12% did not support the use of biosimilars due to the lack of RCT evidence                                                                                                                                                                                                                                                                                                                                                                                                                                                                                                                                                                                                                                                                                                                                                                                                                                                                                          | 84% of all physicians and 80% of those who had some concerns (67%) chose biosimilar in at least one choice set<br><br>The most important attribute driving the choice: stopping rule (whether treatment after 12 months is reimbursed)<br><br>Estimated probability of choosing the originator over biosimilar in the present reimbursement situation: 48%. Probability of choosing the biosimilars with all the benefits offered over the originator in the present situation: 85% versus 15% | 61% of all and 53% of those who were concerned chose biosimilar in at least one of the choice sets<br><br>The most important attribute driving the choice: stopping rule<br><br>Estimated probability of choosing the originator over biosimilar in the present reimbursement situation: 71%. Probability of choosing the biosimilars with all the benefits offered over the originator in the present situation: 63% versus 37% | N/A                                                                                                                                                                                                                  |

|                                                        |                                                                                                                                                                                                                                                                                                                                                                                                                                                                                                                                               |                                                                                                                                                                                                                                                                                        |                                                                                                                                                                                                                                                                                                                                                                                                                                    |                                                                                                                                                           |                                                                                                                                                                                                                                                                                                                                                                                                                                                                                                                                                                                 |                                                                                                                                                                                                                                                                                                                                                                                                                                                                                                                |                                                                                                                                                                                                                                                                                                               |                                                                                                                                                                                                                                                                     |
|--------------------------------------------------------|-----------------------------------------------------------------------------------------------------------------------------------------------------------------------------------------------------------------------------------------------------------------------------------------------------------------------------------------------------------------------------------------------------------------------------------------------------------------------------------------------------------------------------------------------|----------------------------------------------------------------------------------------------------------------------------------------------------------------------------------------------------------------------------------------------------------------------------------------|------------------------------------------------------------------------------------------------------------------------------------------------------------------------------------------------------------------------------------------------------------------------------------------------------------------------------------------------------------------------------------------------------------------------------------|-----------------------------------------------------------------------------------------------------------------------------------------------------------|---------------------------------------------------------------------------------------------------------------------------------------------------------------------------------------------------------------------------------------------------------------------------------------------------------------------------------------------------------------------------------------------------------------------------------------------------------------------------------------------------------------------------------------------------------------------------------|----------------------------------------------------------------------------------------------------------------------------------------------------------------------------------------------------------------------------------------------------------------------------------------------------------------------------------------------------------------------------------------------------------------------------------------------------------------------------------------------------------------|---------------------------------------------------------------------------------------------------------------------------------------------------------------------------------------------------------------------------------------------------------------------------------------------------------------|---------------------------------------------------------------------------------------------------------------------------------------------------------------------------------------------------------------------------------------------------------------------|
| Baji et al. 2016b <sup>21</sup> (Hungary)              | Gastroenterologists' treatment preferences in Crohn's disease<br><br>Discrete choice experiment survey (in which prescribers are given hypothetical scenario and possible treatment options, and they are asked to choose the alternative they prefer <sup>20</sup> ) in a Hungarian professional society meeting in 2014 (n = 51)                                                                                                                                                                                                            | N/A                                                                                                                                                                                                                                                                                    | N/A                                                                                                                                                                                                                                                                                                                                                                                                                                | N/A                                                                                                                                                       | 20% had no concerns on biosimilars, 65% had some concerns on efficacy and/or safety and 12% did not support the use of biosimilars due to the lack of RCT evidence<br><br>Four clinicians were classified to "No biosimilar" attitude group, 19 to the "Biosimilar to new patients only" group and 27 to the "Biosimilar" group (one clinician was excluded from the analysis)                                                                                                                                                                                                  | Men, senior consultants, working in inflammatory bowel disease centre and treating more patients were more likely to consider biosimilars for biologic-naïve patients only<br><br>Estimated probability of choosing the originator over biosimilar, when no benefits are offered for using the biosimilar: 60%.<br>Probability of choosing the biosimilar with all kinds of benefits over the originator: 89% versus 11%<br><br>The most important attribute driving the choice: continuity of medicine supply | Estimated probability of choosing the originator over biosimilar, when no benefits are offered for using the biosimilar: 74%.<br>Probability of choosing the biosimilar with all kinds of benefits over the originator: 44% versus 56%<br><br>The most important determinant of choice: type of the treatment | N/A                                                                                                                                                                                                                                                                 |
| Barsell et al. 2017 <sup>31</sup> (USA)                | Dermatologists' knowledge and perceptions of biosimilars, whether a practice gap exists and to study misconception and barriers to biosimilar usage<br><br>Web survey of 14 multiple-choice questions for the members of five state dermatologic societies and National Psoriasis Foundation in 2015 (n = 97)                                                                                                                                                                                                                                 | 62% responded having basic understanding of biosimilars, 27% complete understanding and 11% that they have never heard of biosimilars                                                                                                                                                  | 37% were aware that biosimilars are highly similar to the reference product, 26% described biosimilar as "generic", 27% described them as same bio-drug with equal bioequivalence and 10% said they did not know the definition. Those with complete understanding (27%), 21% incorrectly described biosimilar as "generic"                                                                                                        | 35% self-study, 25% scientific publications, 17% conferences and seminars, 3% biosimilar company-sponsored events and 20% other                           | Advantages: 71% low price to patients, 68% easier access to treatment and 65% low price to payers. Disadvantages: 71% efficacy, 66% potential switch to biosimilar without physicians' knowledge, 66% safety and 63% immunogenicity. 8% believed there were no advantages<br><br>Convincing physicians of interchangeability: 44% extensive phase I, II and III studies, 37% valid longitudinal data from patient registries, 37% same level of testing (not specified more thoroughly) than generic medicines, 36% evidence of pharmacokinetic and pharmacodynamic equivalence | 25% definitely or highly likely to prescribe a biosimilar<br><br>38% will try it on very selected patients                                                                                                                                                                                                                                                                                                                                                                                                     | N/A                                                                                                                                                                                                                                                                                                           | 88% believed that there will be a political change resulting to pharmacist-led substitution without consulting physicians in the future<br><br>76% very important and 18% somewhat important to have control over whether patients receive originator or biosimilar |
| Beck et al. 2016 <sup>2</sup> (France)                 | Knowledge, experience and opinions related to biosimilars and to identify expectations, barriers and possible options to promote prescription<br><br>Web survey of 22 questions for nearly 500 rheumatologists in 2015 (n = 116)                                                                                                                                                                                                                                                                                                              | 55%/3% considered they had little/no knowledge of biosimilars<br><br>5% felt very well-informed<br><br>Hospital-based rheumatologists were likely to be more familiar with biosimilars compared to office-based rheumatologists<br><br>98% had at least one question about biosimilars | 85% thought biosimilars are similar to reference products that had gone off-patent; 85% considered biosimilars have no meaningful differences in quality, 80% in safety and 90% in efficacy; 65% thought that the assessment of biosimilarity requires more comprehensive data than generic drugs; and 46% believed that biosimilar marketing authorisation is granted on the sole investigation of pharmacokinetic bioequivalence | 84% self-study and scientific publications, 76% pharmaceutical companies, 72% continuous training, 54% physician colleagues and 13% pharmacist colleagues | 44% agree and 10% strongly agree being in favour of implementation of biosimilars<br><br>Positive factors: 90% healthcare cost savings, 61% releasing of resources allowing treating additional patients, 49% positive impact on patients' access to innovative medicines and 46% health policy-makers incentives. Barriers: 67% indication extrapolation of efficacy and safety, 66% lack of information about tolerability, 59% risk of increasing patients' concerns, 57% lack of clinical trials and 55% patients' wishes to be treated with the originator                 | 7% had already prescribed biosimilars mentioned in the survey<br><br>89% considered it was conceivable to start a treatment for biologic-naïve patients                                                                                                                                                                                                                                                                                                                                                        | 25% could envision a switch                                                                                                                                                                                                                                                                                   | 58% strongly disagree and 23% disagree of approving substitution by a pharmacist                                                                                                                                                                                    |
| Chapman et al. 2018 <sup>23</sup> (the United Kingdom) | Healthcare professionals' knowledge and attitudes towards infliximab and insulin glargine biosimilars and factors influencing their prescribing and compare healthcare professionals' attitudes with the utilisation of these biosimilars in hospitals<br><br>Web-based survey of 11 questions for societies of dermatology, diabetology, gastroenterology and rheumatology in 2016-2017 and drug utilisation analysis from DEFINE database in 2015-2016 (n = 234). Other stakeholders apart from physicians are not addressed in this review | N/A                                                                                                                                                                                                                                                                                    | 72% correctly thought biosimilars are similar copies of biologic medicines, 18% thought biosimilars are generic biologic medicines, 3% counterfeit medicines, 3% had heard of them but did not know what they were, 3% had never heard of them and 1% new biological medicines<br><br>75% knew biosimilars were available on their local formulary                                                                                 | N/A                                                                                                                                                       | Gastroenterologists were most frequent prescribers of biosimilars (prescribing every day or week), followed by rheumatologists, diabetologists and dermatologists<br><br>The dominant consideration: cost saving<br><br>Increasing the use of biosimilars: regulatory guidance and robust pharmacovigilance studies, local policy, potential cost saving to organisation (whether or not savings were invested in the prescribers' department) and robust cost-effectiveness data of biosimilar vs. originator                                                                  | 95% and 90% of gastroenterologists, 92% of rheumatologists, 79% of dermatologists and 75% of diabetologists had no or minor concerns on safety<br><br>90% of gastroenterologists, 88% of rheumatologists, 74% of dermatologists and 68% of diabetologists had no or minor concerns on efficacy                                                                                                                                                                                                                 | 95% of gastroenterologists, 53% of rheumatologists, 78% of dermatologists and 69% of diabetologists had no or minor concerns on safety<br><br>93% of gastroenterologists, 55% of rheumatologists, 79% of dermatologists and 65% of diabetologists had no or minor concerns on efficacy                        | N/A                                                                                                                                                                                                                                                                 |
| Cohen et al. 2016 <sup>32</sup> (USA)                  | Dermatologists', gastroenterologists', haematologist-oncologists', medical oncologists', nephrologists' and rheumatologists' awareness, knowledge, and                                                                                                                                                                                                                                                                                                                                                                                        | N/A                                                                                                                                                                                                                                                                                    | 92% of dermatologists, 90% of gastroenterologists, 83% of rheumatologists, 74%                                                                                                                                                                                                                                                                                                                                                     | 88% scientific journals, 73% FDA and 64% physician peers. Trust to media was less than 5%                                                                 | Generally positive attitudes towards biosimilars. Dermatologists and rheumatologists appear less enthusiastic                                                                                                                                                                                                                                                                                                                                                                                                                                                                   | N/A                                                                                                                                                                                                                                                                                                                                                                                                                                                                                                            | 91% open to switching patients to a biosimilar                                                                                                                                                                                                                                                                | N/A                                                                                                                                                                                                                                                                 |

|                                                                                                                 |                                                                                                                                                                                                                                                                                                                                                                                                                                                                                                                    |                                                                                                                        |                                                                                                                                                                                                                                                                                                                                                                                                             |                                                                                                                                                                                                                                                                                                                              |                                                                                                                                                                                                                                                                                                                                                                                                                                                                                                                                                                                                                                                                                                                                                                                         |                                                                                                                                                             |                                                                                                                               |                                                                                                                                                        |
|-----------------------------------------------------------------------------------------------------------------|--------------------------------------------------------------------------------------------------------------------------------------------------------------------------------------------------------------------------------------------------------------------------------------------------------------------------------------------------------------------------------------------------------------------------------------------------------------------------------------------------------------------|------------------------------------------------------------------------------------------------------------------------|-------------------------------------------------------------------------------------------------------------------------------------------------------------------------------------------------------------------------------------------------------------------------------------------------------------------------------------------------------------------------------------------------------------|------------------------------------------------------------------------------------------------------------------------------------------------------------------------------------------------------------------------------------------------------------------------------------------------------------------------------|-----------------------------------------------------------------------------------------------------------------------------------------------------------------------------------------------------------------------------------------------------------------------------------------------------------------------------------------------------------------------------------------------------------------------------------------------------------------------------------------------------------------------------------------------------------------------------------------------------------------------------------------------------------------------------------------------------------------------------------------------------------------------------------------|-------------------------------------------------------------------------------------------------------------------------------------------------------------|-------------------------------------------------------------------------------------------------------------------------------|--------------------------------------------------------------------------------------------------------------------------------------------------------|
|                                                                                                                 | perceptions of biosimilars over time (survey will be repeated in 2-3 years)<br>Survey of 19 questions in 2015-2016 (n = 1201)                                                                                                                                                                                                                                                                                                                                                                                      |                                                                                                                        | of nephrologists, 69% of haematologist-oncologists and 63% of medical oncologists were aware which of the listed medicines in their specialty were biologic<br><br>56% of rheumatologists, 33% of gastroenterologists, 31% of dermatologists, 15% of nephrologists, 9% of medical-oncologists and 3% of haematologist-oncologists incorrectly reported there are no biosimilars available                   |                                                                                                                                                                                                                                                                                                                              | 62% considered the biosimilar will have equivalent efficacy as its originator and 57% that the biosimilar will be at least as safe as the originator<br><br>58% had concerns on patient compliance and access to treatments options with originators<br><br>Positive factors: increased access and utilization of biologic medicines, expanded treatment options and provided savings for the healthcare system                                                                                                                                                                                                                                                                                                                                                                         |                                                                                                                                                             |                                                                                                                               |                                                                                                                                                        |
| Danese et al. 2016 <sup>24</sup> (Europe, countries not reported)                                               | Evolution on thinking about biosimilars one year after they had become available in the EU. Comparison to the survey published by Danese et al. 2014 <sup>24</sup><br><br>Web survey with 14 multiple-choice questions for members of European Crohn's and Colitis Organization in 2015 (n = 118)                                                                                                                                                                                                                  | 56% judged that educational activities that they were exposed to was fair and adequate, while 16% found it unnecessary | N/A                                                                                                                                                                                                                                                                                                                                                                                                         | More information was hoped for 75% medical societies, 52% multispecialty safety registries, 47% health institutions and 26% guidelines                                                                                                                                                                                       | 29% totally confident, 18% very confident and 34% confident enough (5%, 8% and 26% in 2013) to prescribe a biosimilar<br><br>Main advantage: 92% (90% in 2013) cost-sparing. Main issue: 42% the lack of data from clinical trials for all indications<br><br>27% (67% in 2013) consider biosimilars have higher immunogenicity compared to the originator and 17% (43% in 2013) different action than the originator<br><br>51% (24% in 2013) thought biosimilar should be approved for all the indications of the originator                                                                                                                                                                                                                                                          | N/A                                                                                                                                                         | 44% (6% in 2013) would switch a patient with remission                                                                        | 89% (85% in 2013) disagreed with automatic substitution by a pharmacist<br><br>13% support substitution for new prescriptions and 13% for all patients |
| Danese et al. 2014 <sup>25</sup> (Europe, countries not reported)                                               | Awareness of and readiness to use biosimilars<br><br>Web survey of 15 questions for 1,000 randomly selected European Crohn's and Colitis Organization members in 2013 (n = 307)                                                                                                                                                                                                                                                                                                                                    | N/A                                                                                                                    | 70% were aware that biosimilar is a similar copy, but not equal to the originator, 19% responded that it is a copy of biological agent, identical to the originator, like a generic                                                                                                                                                                                                                         | Preferred information: 81% multi-specialty international safety registries to monitor safety and effectiveness, 78% health institutions on the development of rules on the use of biosimilars, 66% medical societies, 61% data regarding the registration process for biosimilars and 57% multispecialty practice guidelines | 6% thought that the originator and biosimilar were interchangeable<br><br>The main advantage: cost-sparing (89%). The main issue: different immunogenicity pattern than the originator (67%)<br><br>50% agreed biosimilars can significantly reduce healthcare costs, 27% expected them only having a marginal impact, 6% expected additional costs of introduction, regulation and pharmacovigilance to offset any potential savings<br><br>24% agreed that the tested biosimilar could be approved for all indications of the originator in terms of safety and efficacy, 19% for all rheumatologic indications, 14% for the specific indication only, 3% stated that all biosimilars could be approved for all indications of the originator and 39% disagreed with all of the above | 61% felt little or no confident in using biosimilars in their everyday clinical practice, 26% confident enough, 8% very confident, and 5% totally confident | 28% would consider replacing originator with a biosimilar                                                                     | 64% against the substitution by pharmacist<br><br>18% would agree only for new patients                                                                |
| Farhat et al. 2016 <sup>26</sup> (Algeria, Belgium, Egypt, Iran, Iraq, Italy, Jordan, Lebanon, Sudan and Syria) | Parameters on the acceptance and future prescription of biosimilars and worldwide situation focusing mainly on the EU and US laws, regulations and legislative pathways, pricing and challenging market access<br><br>Survey for over 150 healthcare professional in the conference meeting in 2015 (n = 117 health care professionals responded, of which most were physicians; exact number of physicians who responded not reported). Other stakeholders apart from physicians are not addressed in this review | N/A                                                                                                                    | 66% knew what biosimilars were, 12% did not know and 22% had not answered the question. Of those who knew (66%), 62% considered biosimilars bioequivalent to originator and have all preclinical and clinical trials equal to the originator<br><br>63% agreed that biosimilars are already marketed in the Arab and Middle Eastern markets, while 45% agreed that they are manufactured in the same region | N/A                                                                                                                                                                                                                                                                                                                          | Drivers for prescribing: 69% FDA or EMA approval, 65% lower price of bioequivalence in comparison to the originator, 48% bio-efficacy, 42% safety and 31% good manufacturing practices and high reputation of the manufacturer. 5% think biosimilars don't have advantages<br><br>35% considered the cost of treatment should not overcome its effectiveness or safety/tolerance<br><br>26% thought lower prices were good news as patients will be treated with biologics<br><br>27% consider biosimilars would bring cost savings<br><br>49% trust companies highly experienced in manufacturing small-molecule generic drugs and 55% companies with prior experience in manufacturing biologics as biosimilar producers                                                              | 41% prescribe biosimilars while 33% don't (note that respondents were also other than physicians)                                                           | N/A                                                                                                                           | N/A                                                                                                                                                    |
| Felix et al. 2014 <sup>23</sup> (USA)                                                                           | Challenges and opportunities of market uptake of biosimilars from the perspectives of physicians and payers<br><br>Survey for physicians that had written about or were familiar with biosimilars based on literature                                                                                                                                                                                                                                                                                              | N/A                                                                                                                    | N/A                                                                                                                                                                                                                                                                                                                                                                                                         | N/A                                                                                                                                                                                                                                                                                                                          | Almost all physicians (n not reported) believed that if biosimilar was approved by FDA it will perform similarly to the originator with regard to safety and efficacy<br><br>Influences of decision making: efficacy and safety, out-of-pocket costs to the patient, price of treatment and immunogenicity                                                                                                                                                                                                                                                                                                                                                                                                                                                                              | Four physicians are somewhat likely, six very likely and three not likely to prescribe a biosimilar to a new patient                                        | 31%/61% (n not reported) say they are somewhat likely/very likely to switch an existing patient from originator to biosimilar | N/A                                                                                                                                                    |

|                                                                                          |                                                                                                                                                                                                                                                                                                                                                                                                                                                                                                                                                                                             |                                                                                                                                                                                                                                                            |                                                                                                                                                                                                      |                                                                                                                                                                                                                                                                                                                                                                                                                                                                                                                                                                                               |                                                                                                                                                                                                                                                                                                                                                                                                                                                                                                                                                                                                                                                                                                                                                        |                                                                                                                                                                                                                                                                                                                                                                                                                                                                                                                                                                                                                                                                                     |                                                                                                                                                                                                                                                                                                  |                                                                                                                                                 |
|------------------------------------------------------------------------------------------|---------------------------------------------------------------------------------------------------------------------------------------------------------------------------------------------------------------------------------------------------------------------------------------------------------------------------------------------------------------------------------------------------------------------------------------------------------------------------------------------------------------------------------------------------------------------------------------------|------------------------------------------------------------------------------------------------------------------------------------------------------------------------------------------------------------------------------------------------------------|------------------------------------------------------------------------------------------------------------------------------------------------------------------------------------------------------|-----------------------------------------------------------------------------------------------------------------------------------------------------------------------------------------------------------------------------------------------------------------------------------------------------------------------------------------------------------------------------------------------------------------------------------------------------------------------------------------------------------------------------------------------------------------------------------------------|--------------------------------------------------------------------------------------------------------------------------------------------------------------------------------------------------------------------------------------------------------------------------------------------------------------------------------------------------------------------------------------------------------------------------------------------------------------------------------------------------------------------------------------------------------------------------------------------------------------------------------------------------------------------------------------------------------------------------------------------------------|-------------------------------------------------------------------------------------------------------------------------------------------------------------------------------------------------------------------------------------------------------------------------------------------------------------------------------------------------------------------------------------------------------------------------------------------------------------------------------------------------------------------------------------------------------------------------------------------------------------------------------------------------------------------------------------|--------------------------------------------------------------------------------------------------------------------------------------------------------------------------------------------------------------------------------------------------------------------------------------------------|-------------------------------------------------------------------------------------------------------------------------------------------------|
|                                                                                          | review of Medline-indexed publications (n = 14). Other stakeholders apart from physicians are not addressed in this review                                                                                                                                                                                                                                                                                                                                                                                                                                                                  |                                                                                                                                                                                                                                                            |                                                                                                                                                                                                      |                                                                                                                                                                                                                                                                                                                                                                                                                                                                                                                                                                                               | 50% (n not reported) consider it is very important that there are proven chemical and pharmacokinetic similarities between originators and biosimilars<br><br>Roughly half (n not reported) consider payer and cost considerations very important                                                                                                                                                                                                                                                                                                                                                                                                                                                                                                      |                                                                                                                                                                                                                                                                                                                                                                                                                                                                                                                                                                                                                                                                                     |                                                                                                                                                                                                                                                                                                  |                                                                                                                                                 |
| Gewanter & Reilly 2014 <sup>37</sup> (Argentina, Brazil, Colombia and Mexico)            | Understanding of biosimilars, how they use them and their concerns for the future<br><br>Web-based survey for 6650 prescribers from global market research panel (n = 399)                                                                                                                                                                                                                                                                                                                                                                                                                  | 35% did not consider themselves familiar with biosimilars, meaning they could not define them or had never heard of them                                                                                                                                   | 49% were aware of differences between biologicals, biosimilars and non-comparable biologicals. 30% were unaware that clinical trials for single indication lead to approval for multiple indications | 71% seminars and conferences, 55% self-study, 32% education from biosimilar companies, 18% clinical trial participation and 4% other means<br><br>37% would like to learn from pharmaceutical companies                                                                                                                                                                                                                                                                                                                                                                                       | 88% prescribe biologicals                                                                                                                                                                                                                                                                                                                                                                                                                                                                                                                                                                                                                                                                                                                              | 50% said they believed if two biological medicines had the same non-proprietary scientific name, patient could receive either product and have the same result                                                                                                                                                                                                                                                                                                                                                                                                                                                                                                                      | 44% said they believed if two biological medicines had the same non-proprietary scientific name, patient could be safely switched during a course of treatment, and the patient would have the same result<br><br>64% would not be comfortable switching for cost reasons rather medical reasons | N/A                                                                                                                                             |
| Grabowski et al. 2015 <sup>34</sup> (Canada)                                             | Gaps in knowledge and attitudes towards biosimilars of rheumatologists<br><br>Web-based survey of 29 questions for 369 members of Canadian Rheumatology Association in February 2014 (n = 81)                                                                                                                                                                                                                                                                                                                                                                                               | 31% indicated themselves being familiar or very familiar with biosimilars<br><br>Those with greater than 20 years of practice were significantly more likely to indicate themselves familiar or very familiar than those with 20 or less years of practice | 66% considered biosimilars essentially same as generic drugs<br><br>38% were aware of Health Canada's guidance on clinical requirement for biosimilar approval                                       | N/A                                                                                                                                                                                                                                                                                                                                                                                                                                                                                                                                                                                           | 94% generally comfortable prescribing biologic medicines to their patients<br><br>31% comfortable prescribing biosimilars to their patients if biosimilar was currently available<br><br>29% declined until their colleagues recommend it<br><br>42% indicated a 30% price reduction, and a third a ≥50% price reduction being reasonable before payers mandated the use of biosimilars over brand name biologics<br><br>54% disagreed or strongly disagreed, 32% agreed or strongly agreed and 14% were neutral using biosimilars with extrapolated indications<br><br>49% not confident, 19% confident or very confident, and a third neutral on the long-term sustainability profile of the biosimilar with 30 weeks of head-to-head clinical trial | 59% consider offering biosimilars, if biosimilar demonstrates that it is comparable to the brand name drug<br><br>72% unlikely or very unlikely, 11% likely or very likely and 16% neutral to offer a biosimilar, when biologic-naïve patient is an ideal candidate, where cost is not an issue<br><br>Greater familiarity with established brand name drugs and uncertainty over the long-term safety of biosimilars were often cited among those unlikely or very unlikely offering biosimilars<br><br>54% did not typically prescribe a biosimilar, were likely or very likely to offer a biosimilar, when the provincial payer or insurance company mandated using a biosimilar | 7.5% consider switching, if biosimilar demonstrates that it is comparable to the brand name drug                                                                                                                                                                                                 | 88% concerned or very concerned if a pharmacist had the ability to substitute a biologic drug for a biosimilar without the physician's approval |
| Hallersten et al. 2016 <sup>30</sup> (France, Germany, Italy, Poland, Spain, Sweden, UK) | Preferences on type and detail of biosimilar information in Summaries of Product Characteristics (SmPC) and the use of information sources when prescribing biologics including biosimilars by dermatologists, endocrinologists, gastroenterologists, haematologists, nephrologists, oncologists and rheumatologists<br><br>Web-survey with approx. 30 multiple-choice questions for 210 physicians (30 from each of the country) who were members of panels of physicians (approximately 250-600 physicians per country) who agreed earlier to participate in such survey studies, in 2015 | N/A                                                                                                                                                                                                                                                        | N/A                                                                                                                                                                                                  | Frequently used information sources: 63% professional guidelines, 55% SmPCs, 51% peer reviewed journals, 42% national or hospital formularies<br><br>The physicians preferred modified SmPC (modified for the purpose of the study) where additional information in the biosimilar label had been added, specifically: 1) clarifying which product (the biosimilar or the reference product) generated which clinical data, 2) inclusion of additional statements indicating that the product is a biosimilar, and 3) that similarity has been evaluated in preclinical and clinical studies. | N/A                                                                                                                                                                                                                                                                                                                                                                                                                                                                                                                                                                                                                                                                                                                                                    | N/A                                                                                                                                                                                                                                                                                                                                                                                                                                                                                                                                                                                                                                                                                 | N/A                                                                                                                                                                                                                                                                                              | N/A                                                                                                                                             |
| Hemmington et al. 2017 <sup>36</sup> (New Zealand)                                       | Perceptions and attitudes towards efficacy, safety and manufacturing of biosimilars, factors associated with positive attitudes, indication extrapolation and switching, and circumstances in which physicians would be reluctant to prescribe biosimilars                                                                                                                                                                                                                                                                                                                                  | 76% reported being familiar and having basic understanding and 13% very familiar and complete understanding of biosimilars, 9% had heard of biosimilars,                                                                                                   | N/A                                                                                                                                                                                                  | N/A                                                                                                                                                                                                                                                                                                                                                                                                                                                                                                                                                                                           | 70% very or somewhat confident of the efficacy of biosimilars<br><br>Less than 20% had negative views<br><br>Situations when biosimilars were not prescribed: 32% lack of clinical data, 17% evidence of adverse effects or lack of efficacy, 15% patients do well with current treatment and 6% patients have complex medical history                                                                                                                                                                                                                                                                                                                                                                                                                 | 71% would prescribe biosimilars for all or some clinical conditions meeting the relevant criteria, 10% would do this for only few or no clinical situations                                                                                                                                                                                                                                                                                                                                                                                                                                                                                                                         | 51% confident and 28% not very confident or not at all confident to switch patients                                                                                                                                                                                                              | N/A                                                                                                                                             |

|                                                                                              |                                                                                                                                                                                                                                                                                                                                                                                                                                    |                                                                                                                                                                                                                                                                                                                      |                                                                                                                                                                                                                                                                                   |                                                                                                                                                                                                                                                           |                                                                                                                                                                                                                                                                                                                                                                                                                                                                                                                                                                                                                                                                                                                                                                                                                                                                                                                                                                                                                                                                                                              |                                                                                                                                                                                                               |                                                                                                                                                           |                                                                                                                                                                                                                                                                                                                                                                                                                                                                      |
|----------------------------------------------------------------------------------------------|------------------------------------------------------------------------------------------------------------------------------------------------------------------------------------------------------------------------------------------------------------------------------------------------------------------------------------------------------------------------------------------------------------------------------------|----------------------------------------------------------------------------------------------------------------------------------------------------------------------------------------------------------------------------------------------------------------------------------------------------------------------|-----------------------------------------------------------------------------------------------------------------------------------------------------------------------------------------------------------------------------------------------------------------------------------|-----------------------------------------------------------------------------------------------------------------------------------------------------------------------------------------------------------------------------------------------------------|--------------------------------------------------------------------------------------------------------------------------------------------------------------------------------------------------------------------------------------------------------------------------------------------------------------------------------------------------------------------------------------------------------------------------------------------------------------------------------------------------------------------------------------------------------------------------------------------------------------------------------------------------------------------------------------------------------------------------------------------------------------------------------------------------------------------------------------------------------------------------------------------------------------------------------------------------------------------------------------------------------------------------------------------------------------------------------------------------------------|---------------------------------------------------------------------------------------------------------------------------------------------------------------------------------------------------------------|-----------------------------------------------------------------------------------------------------------------------------------------------------------|----------------------------------------------------------------------------------------------------------------------------------------------------------------------------------------------------------------------------------------------------------------------------------------------------------------------------------------------------------------------------------------------------------------------------------------------------------------------|
|                                                                                              | E-mail survey for 327 physicians in medical specialist society (n = 110)                                                                                                                                                                                                                                                                                                                                                           | but could not define them, and 2% had never heard of biosimilars                                                                                                                                                                                                                                                     |                                                                                                                                                                                                                                                                                   |                                                                                                                                                                                                                                                           | 47% very confident or somewhat confident, 32% not confident and the remainder undecided in indication extrapolation                                                                                                                                                                                                                                                                                                                                                                                                                                                                                                                                                                                                                                                                                                                                                                                                                                                                                                                                                                                          |                                                                                                                                                                                                               |                                                                                                                                                           |                                                                                                                                                                                                                                                                                                                                                                                                                                                                      |
| O'Callaghan et al. 2017 <sup>10</sup> (Ireland)                                              | Medical specialists', general practitioners' and community pharmacists awareness of and attitudes to biosimilars<br><br>E-mail-survey of 14-20 questions for 2917 physicians in national professional societies in 2016 (n = 253 analysed answers from general practitioners and n = 102 from medical specialists). Other stakeholders apart from physicians are not addressed in this review                                      | 44% of medical specialists and 5% of general practitioners very familiar with biosimilars, 41% and 35% familiar, and 6% and 25% had never heard the term "biosimilar"                                                                                                                                                | 25% of medical specialists and 18% of general practitioners considered biosimilars the same as generic medicines<br><br>31% of medical specialists incorrectly agreed that biological medicines sharing the same international non-proprietary name were "structurally identical" | Medical specialists (n = 101, not all answered this question): 72% guidelines from professional societies, 68% published literature and 63% educational events<br><br>GPs (n = 247, not all answered this question): 58% national or hospital formularies | 59% of those aware of biosimilars in their therapeutic area (n = 73) prescribed biosimilars, while 40% didn't<br><br>Concerns: 81% efficacy in extrapolated indications, 81% immunogenicity, 79% efficacy, 78% safety, 73% quality and 62% traceability                                                                                                                                                                                                                                                                                                                                                                                                                                                                                                                                                                                                                                                                                                                                                                                                                                                      | 67% of medical specialists that prescribed biosimilars (n = 43) would most likely prescribe a biosimilar for treatment initiation                                                                             | 28% of medical specialists that prescribed biosimilars (n = 43) would be likely to switch from originator to biosimilar                                   | <5% of medical specialists would consider pharmacist-led substitution appropriate<br><br>49% consider decisions should be taken by the prescriber on treatment initiation and 61% during treatment course. 43% consider decisions should be agreed with clinician in advance on treatment initiation and 35% during treatment course<br><br>84% think notifications for physician very important or critical in treatment initiation and 90% during treatment course |
| O Dolinar & Reilly 2014 <sup>26</sup> (France, Germany, Italy, Spain and the United Kingdom) | Nephrologists', rheumatologists', dermatologists', neurologists', endocrinologists' and oncologists' attitudes on biosimilar naming, substitution, and knowledge, sources of information and need for further education on biosimilars<br><br>Web-based 15-minutes short survey for 4,324 global physician market research panel of at the last quarter of 2013. 470 prescribers (20% of each five countries) completed the survey | 46% responded having basic understanding, 43% complete understanding, 11% could not define biosimilars and 1% had never heard of biosimilars<br><br>53% incorrectly thought biosimilar and originator were structurally identical and 37% incorrectly believed biosimilars are clinically tested for all indications | N/A                                                                                                                                                                                                                                                                               | 47% conferences and seminars, 35% self-study, 11% studies sponsored by biosimilar companies and 6% equally studies sponsored by innovator companies, clinical trial participation and other routes                                                        | 48% said it was very important, 24% critically important, 23% somewhat important, 4% slightly important and 1% not important to have a sole authority to select the medicine                                                                                                                                                                                                                                                                                                                                                                                                                                                                                                                                                                                                                                                                                                                                                                                                                                                                                                                                 | 47% considered that products with the same non-proprietary name could be safely given to a patient with same results, 40% didn't think that way                                                               | 45% think patients can't be switched between the products with same non-proprietary names, 39% believed patients could be switched safely and effectively | 62% not acceptable, 35% acceptable and 3% totally acceptable on pharmacist-led substitution<br><br>47% very important, 30% critical, 6% slightly important and 1% not important to receive a notification if the pharmacist had dispensed other than prescribed biologic medicine during a repeated treatment                                                                                                                                                        |
| van Overbeeke et al. 2017 <sup>27</sup> (Belgium)                                            | Knowledge and perceptions of patients and physicians with regard to originators and biosimilars and differences in perceptions and the factors influencing their preferences<br><br>Web survey of multiple-choice and open-ended questions for all 232 Belgian rheumatologists in 2016 (n = 41 responded). Other stakeholders apart from physicians are not addressed in this review                                               | 95% considered biosimilars are similar, but not identical                                                                                                                                                                                                                                                            | 90% were able to share the most complete definition of a biosimilar                                                                                                                                                                                                               | N/A                                                                                                                                                                                                                                                       | 7% had prescribed biosimilars. 73% preferred the originator when the prices were equal and 38% when originator was more expensive. When prices were equal, none preferred biosimilar.<br><br>93% considered price, 63% safety, 61% quality and 61% efficacy as sources of differences between originators and biosimilars<br><br>33% considered biosimilars and originators interchangeable if biosimilarity is proven in the same indication and 38% in indications where the medicine works via the same biological mechanism. 28% considered that biosimilars and originators were never interchangeable<br><br>56% think extrapolation could only be performed if efficacy and safety is proven to be similar in one of the indications and if the medicine works via the same mechanism in the other indications. 39% stated the indications should never be extrapolated<br><br>Positive influencers: clinical trials with positive results and clinical data in the respective indication. Negative influencers: less studied than the originator and no clinical trials in the respective indication | 8% would not prescribe a biosimilar and 60% would only prescribe a biosimilar to biologic-naïve patients.                                                                                                     | N/A                                                                                                                                                       | N/A                                                                                                                                                                                                                                                                                                                                                                                                                                                                  |
| Reilly & Murby 2017 <sup>35</sup> (Australia)                                                | Opinions on the naming of biologicals and biosimilars, how the use of these medicines is recorded and their views on substitution of, familiarity with, knowledge of, attitudes to and beliefs in biosimilars<br><br>Web-based survey for prescribers recruited from a global, commercial database of health care professional in 2016 (n = 451, of which 160 completed the survey)                                                | 21% considered themselves very familiar and having complete understanding of biosimilars, 73% basic understanding and 6% could not define them                                                                                                                                                                       | 50% thought biosimilars go through the same regulatory process as original biologics<br><br>70% knew biosimilars could be approved for all or for some indications of the originator                                                                                              | 46% published literature, 28% colleagues, 27% information from Pharmaceutical Benefits Advisory Committee, 24% product information label, 19% information from Therapeutic Goods Administration, 18% sales representative, 13% hospital formulary         | N/A                                                                                                                                                                                                                                                                                                                                                                                                                                                                                                                                                                                                                                                                                                                                                                                                                                                                                                                                                                                                                                                                                                          | 16% would be comfortable prescribing a biosimilar that was approved for several indications based on clinical trials in only one indication, 11% would not feel comfortable and 73% had some concerns on this | N/A                                                                                                                                                       | 54% very and 36% critically important to have sole authority to decide of which biological was dispensed<br><br>Evidence required for pharmacist-led substitution: 53% clinical trial data of no safety of efficacy risks in switching, 53% clinical trial data of no safety of efficacy risks                                                                                                                                                                       |



|                                              |                                                                                                                                                                                                                                                                                                                                                                                                                                                                                                                                                                                                                                                                                                                                                                                                                                                                          |     |     |                                     |                                                                                                                                                                                                                                                                                                                                                                                                                                                                                                                   |                                                                             |     |                                                                                                                  |
|----------------------------------------------|--------------------------------------------------------------------------------------------------------------------------------------------------------------------------------------------------------------------------------------------------------------------------------------------------------------------------------------------------------------------------------------------------------------------------------------------------------------------------------------------------------------------------------------------------------------------------------------------------------------------------------------------------------------------------------------------------------------------------------------------------------------------------------------------------------------------------------------------------------------------------|-----|-----|-------------------------------------|-------------------------------------------------------------------------------------------------------------------------------------------------------------------------------------------------------------------------------------------------------------------------------------------------------------------------------------------------------------------------------------------------------------------------------------------------------------------------------------------------------------------|-----------------------------------------------------------------------------|-----|------------------------------------------------------------------------------------------------------------------|
|                                              |                                                                                                                                                                                                                                                                                                                                                                                                                                                                                                                                                                                                                                                                                                                                                                                                                                                                          |     |     | 43% never used published literature |                                                                                                                                                                                                                                                                                                                                                                                                                                                                                                                   |                                                                             |     | after multiple switches, 27% in-market experience, 24% observational data and 6% no evidence would be sufficient |
| Sullivan et al. 2017 <sup>28</sup> (Germany) | <p>Motivators of prescribing biosimilars, preferences matching actual prescribing behaviour and patient acceptance, satisfaction and concerns on biosimilars and how these relate to the treatment with originators or biosimilars</p> <p>Real world, cross-sectional study (in which physicians filled a survey form and reported their prescribing, and recruited patients that also filled a questionnaire form to provide information on how reported prescribing was occurred in practice) in 2015-2016 (n = 25). Other stakeholders apart from physicians are not addressed in this review</p> <p>Based on their response, 11 physicians were assigned to investigative (primarily concerned with symptom improvement and disease modification), 7 to conservative (primarily concerned with safety) and 7 to other (influenced primarily by other factors)</p>    | N/A | N/A | N/A                                 | <p>Biosimilars account for 12-13% of all biologic therapies the respondents prescribe</p> <p>Reasons to prescribe: desire to get experience with the new product (89% of investigative, 100% of conservative and 57% of other), being convinced of equivalent efficacy compared to originators (44%, 67% and 43%), lower cost (44%, 63% and 71%), believing that is economic prescribing (44%, 83% and 57%) and believing that using biosimilars makes savings which can be used elsewhere (22%, 67% and 29%)</p> | 88% would prefer to prescribe originator to biosimilar as 1st line therapy  | N/A | N/A                                                                                                              |
| Waller et al. 2017 <sup>29</sup> (Germany)   | <p>Motivators of prescribing biosimilars, preferences matching actual prescribing behaviour, and patient acceptance, satisfaction and concerns on biosimilars and how these relate to the treatment with originators or biosimilars</p> <p>Real world, cross-sectional study (in which physicians filled a survey form and reported their prescribing, and recruited patients that also filled a questionnaire form to provide information on how reported prescribing was occurred in practice) in 2015-2016 (n = 50). Other stakeholders apart from physicians are not addressed in this review</p> <p>Based on their response, 23 physicians were assigned to investigative (primarily concerned with symptom improvement and disease modification), 17 to conservative (primarily concerned with safety) and 10 to other (influenced primarily by other factors)</p> | N/A | N/A | N/A                                 | <p>Biosimilars constitute less than 10% of the biologic therapies the respondents prescribed</p> <p>Reasons to prescribe: desire to get experience with the new product (86% of investigative, 65% of conservative and 50% of other), being convinced of equivalent efficacy compared to originators (64%, 65% and 50%) and lower costs (64%, 71% and 88%)</p>                                                                                                                                                    | >95% would prefer to prescribe originator to biosimilar as 1st line therapy | N/A | N/A                                                                                                              |

11

1  
2  
3  
4 Physicians use several information sources on biologic medicines, such as scientific publications (25–84%), self-  
5 study (35–84%), pharmaceutical companies (32–76%), guidelines from professional societies (26–75%),  
6 educational events and conferences (17–71%), other published literature (46–68%), physician colleagues (28–  
7 54%), safety registries (52%) and pharmacist colleagues (19%)<sup>10,17,19,22,24–26,30–32,35,37</sup> (**Table 2**). According to a  
8 single study, information sources may vary according to the educational background of physicians, as the most  
9 common information source were the guidelines from professional societies for medical specialists and the national  
10 or hospital formularies for general practitioners<sup>10</sup>.  
11  
12  
13  
14  
15  
16  
17  
18  
19  
20  
21  
22  
23  
24  
25  
26  
27  
28  
29  
30  
31  
32  
33  
34  
35  
36  
37  
38  
39  
40  
41  
42  
43  
44  
45  
46  
47  
48  
49  
50  
51  
52  
53  
54  
55  
56  
57  
58  
59  
60

Table 3. Summary of the quality evaluation of the 23 included studies of this systematic review.

| Reference                               | Main strengths                                                                                                                       | Main limitations                                                                                                                                                                                                                                                             | Quality according to the quality assessment protocol |
|-----------------------------------------|--------------------------------------------------------------------------------------------------------------------------------------|------------------------------------------------------------------------------------------------------------------------------------------------------------------------------------------------------------------------------------------------------------------------------|------------------------------------------------------|
| Aladul et al. 2019 <sup>18</sup>        | Results logically and clearly displayed                                                                                              | Details of the questionnaire form were not available, discussion on methodology partly lacking                                                                                                                                                                               | High                                                 |
| Baji et al. 2016a <sup>20</sup>         | Well-described and logically presented methodology, results and discussion                                                           | Ethical discussion lacking                                                                                                                                                                                                                                                   | High                                                 |
| Baji et al. 2016b <sup>21</sup>         | Well-described and logically presented methodology, results and discussion                                                           | Critical and ethical discussion partly lacking                                                                                                                                                                                                                               | High                                                 |
| Chapman et al. 2018 <sup>23</sup>       | Mainly well-described and logically presented methodology, results and discussion                                                    | More in-depth information could have been collected by a qualitative study                                                                                                                                                                                                   | High                                                 |
| Grabowski et al. 2015 <sup>34</sup>     | Well-described and logically presented methodology, results and discussion                                                           | More in-depth information could have been collected by a qualitative study                                                                                                                                                                                                   | High*                                                |
| Hemmington et al. 2017 <sup>36</sup>    | Well-described and logically presented methodology, results and discussion                                                           | Details of the questionnaire form were not available, more in-depth information could have been collected by a qualitative study                                                                                                                                             | High                                                 |
| O'Callaghan et al. 2017 <sup>10</sup>   | Well-described and logically presented methodology, results and discussion                                                           | More in-depth information could have been collected by a qualitative study                                                                                                                                                                                                   | High                                                 |
| van Overbeeke et al. 2017 <sup>27</sup> | Well-described and logically presented methodology, results and discussion                                                           | More in-depth information could have been collected by a qualitative study                                                                                                                                                                                                   | High                                                 |
| Aladul et al. 2018 <sup>19</sup>        | Semi-structured interviews provide a more in-depth view on the perceptions of healthcare professional in comparison to short surveys | Exact numbers of respondents which certain opinion (n) not always reported, low number of representatives per each professional group                                                                                                                                        | Moderate*                                            |
| Barsell et al. 2017 <sup>31</sup>       | Well-presented results and discussion                                                                                                | Details of the questionnaire form were not available, description of methodology lacking, e.g. dropout not described, ethical discussion lacking                                                                                                                             | Moderate                                             |
| Beck et al. 2016 <sup>22</sup>          | Well-presented results and discussion                                                                                                | Details of the questionnaire form were not available, validity of the instrument unclear, as more in-depth information could have been collected by a qualitative study, dropout not described accurately                                                                    | Moderate*                                            |
| Hallersten et al. 2016 <sup>30</sup>    | Results clearly presented                                                                                                            | Details of the panel of physicians in different European countries where the respondents were recruited were not shown. Critical discussion on the method partly lacking.                                                                                                    | Moderate                                             |
| Sullivan et al. 2017 <sup>28</sup>      | Results clearly presented                                                                                                            | Dropout not described accurately, some inconsistencies in the presentation of methodology and discussion                                                                                                                                                                     | Moderate*                                            |
| Waller et al. 2017 <sup>29</sup>        | Well-presented results and discussion                                                                                                | Some inconsistencies in the presentation of methodology, e.g. sample selection and dropout                                                                                                                                                                                   | Moderate*                                            |
| Akhmetov et al. 2015 <sup>17</sup>      | Explicit aims                                                                                                                        | Clear presentation of results lacking, critical and ethical discussion lacking                                                                                                                                                                                               | Low                                                  |
| Cohen et al. 2016 <sup>32</sup>         | Mainly well-presented results and discussion                                                                                         | Details of the questionnaire form were not available, description of methodology lacking, ethical discussion lacking                                                                                                                                                         | Low                                                  |
| Danese et al. 2016 <sup>24</sup>        | Results clearly presented                                                                                                            | Details of the questionnaire form were not available, critical and ethical discussion partly lacking, description of methodology partly lacking                                                                                                                              | Low                                                  |
| Danese et al. 2014 <sup>25</sup>        | Results clearly presented                                                                                                            | Statistical analyses lacking, critical and ethical discussion lacking, description of methodology partly lacking, for example the number of invited members not mentioned                                                                                                    | Low                                                  |
| Farhat et al. 2016 <sup>38</sup>        | Mainly logically presented methodology                                                                                               | Aim is not explicitly presented, number of physicians who responded not reported, results presented in table format only, critical discussion lacking                                                                                                                        | Low*                                                 |
| Felix et al. 2014 <sup>33</sup>         | Explicit aims                                                                                                                        | Strategic sample selection, details of the questionnaire form were not available, exact numbers of respondents which certain opinion (n) not always reported, description of used statistical methods and data analysis lacking, inconsistency in the description of results | Low                                                  |
| Gewanter & Reilly 2014 <sup>37</sup>    | Explicit aims                                                                                                                        | Respondents from market research panel resulting that respondents work in disciplines in which don't necessarily involve biosimilars, such as psychiatry, description of used statistical methods and data analysis lacking, critical and ethical discussion lacking         | Low                                                  |
| O'Dolinar & Reilly 2014 <sup>26</sup>   | Explicit aims                                                                                                                        | Intentional sample selection, clear presentation of results lacking, critical and ethical discussion lacking                                                                                                                                                                 | Low                                                  |
| Reilly & Murby 2017 <sup>35</sup>       | Explicit aims                                                                                                                        | Description of data collection partly lacking, description of used statistical methods and data analysis lacking                                                                                                                                                             | Low                                                  |

\* Differences in opinions of which quality grade each publication was given, set in consensus

### Attitudes towards and experienced advantages and disadvantages of biosimilars (n = 21)

Physicians' reported attitudes towards biosimilars seem contradictory<sup>10, 20–25,27–29,31–34,36–38</sup> (Table 2). Some (6–38%) physicians consider biosimilars and originator products interchangeable, while others (28%) never think so<sup>25, 27</sup>. Some studies show that 65–67% of physicians have concerns regarding biosimilars<sup>20–21</sup>, while others report that 54–94% of physicians feel somewhat or very confident prescribing biosimilars<sup>10, 22,24,34,36</sup>. Regardless, a positive attitude towards biosimilars does not automatically translate into prescribing, as physicians seem to prefer originator products to biosimilars<sup>20,27,34</sup>. Studies indicate that there might be differences in attitudes towards biosimilars between specialties: gastroenterologists seem frequent prescribers of biosimilars, while dermatologists and rheumatologists seem less enthusiastic<sup>19,23,32</sup>.

The main experienced advantages of biosimilars are cost savings<sup>18,22–25,31</sup>, lower price in comparison to the originator biologic medicine<sup>31,38</sup> and physicians' willingness to try new treatments<sup>28–29</sup>(Table 2). Additionally, in single studies, robust pharmacovigilance studies<sup>18</sup>, easier access to treatment for patients<sup>31</sup>, and approval of the European Medicines Agency or the Food and Drug Administration<sup>38</sup> were reported as motivators for prescribing biosimilars. Most commonly reported disadvantages were distrust in safety<sup>10,18,22,31,33</sup>, efficacy<sup>10,18,22,31,33</sup>, immunogenicity<sup>10,25,31</sup> and indication extrapolation of biosimilars<sup>10,34</sup> or the lack of clinical data on biosimilars<sup>24,26</sup>. Single studies also suggested the quality<sup>10</sup>, traceability<sup>10</sup> or tolerability<sup>22</sup> of biosimilars and patients' concerns towards biosimilars<sup>22</sup> as disadvantages.

### Initiation of biosimilars and switches between original biologic medicines and biosimilars (n = 21)

Physicians (39–89%) seem more eager to prescribe a biosimilar for biologic-naïve patients rather than patients already treated with biologic medicines<sup>10,20,23,25,27–29,31,33–38</sup> (Table 2). In discrete choice experiment studies, for example, 61–84% of gastroenterologists chose biosimilars in at least one of the choice sets for biological-naïve patients<sup>20–21</sup>. However, there are also other factors affecting the medicine selection, such as the cost of the medicines. It was reported, that if cost were not an issue, only 11% of physicians would choose a biosimilar for treatment initiation<sup>34</sup>. Additionally, studies suggest that some personal characteristics may influence on the uptake of biosimilars by individual physicians. Men, senior consultants and those treating more patients<sup>21</sup>, along with those with greater familiarity with brand name medicines and uncertainty of long-term safety of biosimilars<sup>34</sup> were often unlikely to choose a biosimilar as initial therapy. Within medical specialties, gastroenterologists (95% with no concerns) appear most confident to use biosimilars in treatment initiations, followed by rheumatologists (92%), dermatologists (79%) and diabetologists (75%)<sup>23</sup>.

Physicians did not seem eager to switch an originator biologic medicine to a biosimilar<sup>10,20–25,32–34,36–37</sup> (Table 2). The share of physicians that were willing to switch an originator to a biosimilar was 51 % or less with the exception of a single study in which the percentage was 91%<sup>10, 22,24–25,32,34,36</sup>. Similarly, when it comes to treatment initiation, medical specialty of the individual physician affects his or her willingness to switch biologic medicines<sup>23</sup>. Gastroenterologists (95% with no concerns) seem most confident on switching, followed by dermatologists (78%), diabetologists (69%) and, notably, rheumatologists (53%).

### Pharmacist-led substitution of biologic medicines (n = 9)

Physicians (64–95%) are concerned about or disagree with pharmacist-led substitution of biologic medicines<sup>10, 19,22,24–26,31,34–35</sup> (Table 2). Studies suggest that having full autonomy on medicine selection and being fully aware of which medicines their patient receives, was often crucial for physicians<sup>10,26,31,35</sup>. However, according to a single study, 88% of physicians believe that there will be a political change resulting to pharmacist-led substitution without consulting physicians in the future<sup>31</sup>.

#### 4 DISCUSSION

According to this systematic review, physicians' knowledge on biosimilars varies widely. In general, measured knowledge appears weaker than self-assessed knowledge. Physicians use multiple information sources on biologic medicines, most commonly scientific publications, pharmaceutical companies and professional societies. Similar to their knowledge, physicians' perceptions towards biosimilars and the uptake of these medicines also vary. Physicians seem to prefer originator products to biosimilars and prescribe biosimilars mainly for biologic-naïve patients. Physicians consider cost savings and lower price in comparison to the originator biologic medicine as main advantages of biosimilars, while doubts often relate to safety, efficacy and immunogenicity of biosimilars. Most physicians have negative perceptions towards pharmacist-led substitution of biologic medicines. The results in this review are in line with an earlier systematic review on healthcare providers' perceptions on biosimilars<sup>12</sup>.

##### Physicians' knowledge on biosimilars

This study found that physicians' knowledge on biosimilars appears inadequate. This may contribute to low prescribing and uptake of biosimilars<sup>10,12,32</sup>. Although this issue has been widely recognised, there is limited evidence on the effectiveness of education interventions on prescribing<sup>40</sup>. On the contrary, academic detailing has proven to be effective in steering prescribing<sup>41–42</sup>. Academic detailing is a method in which a trained educator meets with a healthcare professional and shares the latest evidence-based information on the topic that is educated<sup>43</sup>. Besides its effectiveness in steering prescribing patterns, academic detailing has been proven to improve the cost-effectiveness of prescribing and reduce medical costs<sup>44–45</sup>. It is vital that in the near future physicians and other healthcare professionals are provided targeted, evidence-based information on biosimilars to support their uptake and to gain the full cost-saving potential of these medicines<sup>46–47</sup>. The educational efforts from medical societies is also vital in the distribution of appropriate biosimilar information<sup>11</sup>.

##### Physicians' attitudes towards biosimilars and means to enhance the uptake

According to this study, physicians' attitudes towards biosimilars are contradictory and the prescribing of biosimilars is more often directed to biologic-naïve patients. This is despite of convincing evidence that supports switching<sup>48</sup>. Prescribing decisions can either be made by individual physicians or, if thereafter necessary, they can be steered by binding policies that vary across countries. Furthermore, besides actual steering policies, there are general differences across health systems in prescribing, dispensing, pricing and reimbursement of biologic medicines that may effect on the uptake.<sup>10–11</sup> For example in Denmark and Norway, hospital, regional or national tendering is in use, resulting in significant savings in the purchase of biologic medicines<sup>11, 49–50</sup>. Some countries have implemented incentives for healthcare professionals<sup>11</sup>. Prescription quotas that define the ratio of biosimilars of all prescribed biologic medicines, are in use in Germany and Sweden<sup>51</sup>, while gain-sharing agreements that enable using the savings from biosimilar uptake to be used in the benefit of the clinic or the organisation are used in Sweden and in the United Kingdom<sup>52–53</sup>. Pharmacist-led substitution of biologic medicines can also be seen as a potential mean to enhance the uptake of biosimilars<sup>11, 31</sup>. Pharmacist-led substitution is legislatively possible in France and in the United States, and for some biological medicines in Australia<sup>54–56</sup>. Furthermore, the implementation of pharmacist-led substitution is currently ongoing in some European countries<sup>46,57</sup>. All these initiatives highlight that the weak uptake of biosimilars has been acknowledged globally, and there is a need to discover sustainable means to enhance and stabilize their uptake<sup>11</sup>. What complicates the issue is that, for example in Europe, even though the biosimilarity between biologic medicines is stated by the European Medicines Agency, the decisions on the interchangeability and substitution are made at the national level. In order to support the uptake of biosimilars, educational measures for both healthcare professionals and patients are needed, although the role of national recommendations, policies and steering for switching and substitution of biologic medicines should not be understated<sup>31,46–47</sup>.

### Strengths and limitations

Main strengths of our review are that the literature search was conducted with the help of an experienced information specialist, and that the step-by-step review and inclusion of publications as well as the quality evaluation of studies was conducted independently by two researchers in order to avoid bias<sup>58</sup>. Compared to the previous systematic review<sup>12</sup>, altogether twelve original publications were added due to a wider literature search focus. Furthermore, in the current study conference papers and Letters to Editors were excluded as for the purpose of the quality assessment, full information about the methodology of the included studies was needed. One major limitation of this review was that the study-by-study data extraction was only done by one researcher. Furthermore, theses or reports by authorities that could have included research results were excluded from this study. In addition, any of the available protocols for quality assessment did not cover different types of study settings and the protocol used in this study was compiled from four separate protocols. In addition, included studies were conducted in different countries with unique regulatory laws and policies that undoubtedly effect on the uptake and prescribing of biosimilars in the national level. Regardless, it is vital to compile studies from different countries with different systems and policies in order to form a comprehensive view on the current situation on the uptake of biosimilars. One notable point is also that the data in the studies that were included in this review were mainly collected in 2017 or before. The topic is very timely and perceptions towards the uptake of biosimilars may change according to new research information, interventions and experience in using these medicines. Thus, there is a need to continue examining perceptions of physicians, both in general and with different disciplines, particularly with qualitative research methods. Further studies are needed to explore the differences between disciplines in the attitudes towards and prescribing of biosimilars as the reasons behind these differences were not possible to explore in detail based on the studies included in this review.

### Practical implications

This systematic review provides up-to-date knowledge on the physicians' perceptions on the uptake of biosimilars and highlights the need for further education and steering upon this issue. The knowledge provided by the review may be utilised in visioning future means to enhance the uptake of biosimilars that could include information sharing and educational interventions by means of e.g. academic detailing. Uptake of biosimilars may also be enhanced by implementing national policies or steering procedures to support the uptake, by means of pharmacist-led substitution of biologic medicines, for example.

## 5 CONCLUSIONS

This systematic review concludes that physicians' knowledge on and attitudes towards biosimilars vary. Although physicians have positive attitudes towards biosimilars, prescribing is limited, especially for patients that are already treated with biologic medicines. Perceptions towards the pharmacist-led substitution of biologic medicines are often negative. Education and national recommendations and policies for switching and substitution of biologic medicines are needed to support the uptake of biosimilars.

### FUNDING

This study is a part of a larger research project funded by the Social Insurance Institution of Finland (Kela), grant (31/26/2017). The funder had no role in the planning or conduction of this review.

### COMPETING INTERESTS

Authors declare no competing interests.

### AUTHOR'S CONTRIBUTIONS

KS, MM, JJ and KHA contributed to the conception or study design. KS and MM acted as principal investigators in the search and evaluation of the literature and in the quality assessment. KS drafted the manuscript. All authors participated in critical revision of the manuscript and approved the final version.

### PATIENT CONSENT

Not required.

### ETHICAL CONSENT

Not required.

### PATIENT AND PUBLIC INVOLVEMENT

This research was done without patient involvement. Patients were not invited to comment on the study design and were not consulted to develop patient relevant outcomes or interpret the results. Patients were not invited to contribute to the writing or editing of this document for readability or accuracy.

### DATA SHARING STATEMENT

All data relevant to the study are included in the article or uploaded as supplementary information.

### REFERENCES

- 1 European Commission. Directive 2001/83/EC of the European Parliament and of the Council of 6 November 2001 on the Community code relating to medicinal products for human use (2001).
- 2 United States Food and Drug Administration. Biosimilar and Interchangeable Products. Updated 2018a. Accessed 27 Jun 2019: [www.fda.gov/Drugs/DevelopmentApprovalProcess/HowDrugsareDevelopedandApproved/ApprovalApplications/TherapeuticBiologicApplications/Biosimilars/ucm580419.htm](http://www.fda.gov/Drugs/DevelopmentApprovalProcess/HowDrugsareDevelopedandApproved/ApprovalApplications/TherapeuticBiologicApplications/Biosimilars/ucm580419.htm)
- 3 McCamish M, Woollett G. Worldwide experience with biosimilar development. *MABs* 2011;3(2):209–17.
- 4 European Medicines Agency. Biosimilar medicines: Overview. Updated 2018a. Accessed 27 Jun 2019: [www.ema.europa.eu/en/human-regulatory/overview/biosimilar-medicines](http://www.ema.europa.eu/en/human-regulatory/overview/biosimilar-medicines)
- 5 QuintilesIMS. 2017 IMS Biosimilar report - The Impact of Biosimilar Competition in Europe. Updated 2017. Accessed 27 Jun 2019: <http://ec.europa.eu/DocsRoom/documents/23102>
- 6 European Medicines Agency. Medicines search. Updated 2018b. Accessed 27 Jun 2019: [www.ema.europa.eu/en/medicines/field\\_ema\\_web\\_categories%253Aname\\_field/Human/ema\\_group\\_types/ema\\_medicine/field\\_ema\\_med\\_status/authorised-36/ema\\_medicine\\_types/field\\_ema\\_med\\_biosimilar/field\\_ema\\_web\\_categories%253Aname\\_field/Human/search\\_api\\_aggregation\\_ema\\_medicine\\_types/field\\_ema\\_med\\_biosimilar/ema\\_group\\_types/ema\\_medicine/field\\_ema\\_med\\_status/authorised-36?sort=ema\\_medicine\\_title&order=asc](http://www.ema.europa.eu/en/medicines/field_ema_web_categories%253Aname_field/Human/ema_group_types/ema_medicine/field_ema_med_status/authorised-36/ema_medicine_types/field_ema_med_biosimilar/field_ema_web_categories%253Aname_field/Human/search_api_aggregation_ema_medicine_types/field_ema_med_biosimilar/ema_group_types/ema_medicine/field_ema_med_status/authorised-36?sort=ema_medicine_title&order=asc)
- 7 United States Food and Drug Administration. Biosimilar Product Information. Updated 2018b. Accessed 27 Jun 2019: [www.fda.gov/drugs/developmentapprovalprocess/howdrugsaredevelopedandapproved/approvalapplications/therapeuticbiologicapplications/biosimilars/ucm580432.htm](http://www.fda.gov/drugs/developmentapprovalprocess/howdrugsaredevelopedandapproved/approvalapplications/therapeuticbiologicapplications/biosimilars/ucm580432.htm)
- 8 Blackstone A, Fuhr JP. The Economics of Biosimilars. *Am Health Drug Benefits* 2013;6(8):469–78.
- 9 European Commission. What you Need to Know about Biosimilar Medicinal Products. A Consensus Information Document. Updated 2013. Accessed 27 Jun 2019: <http://ec.europa.eu/DocsRoom/documents/8242/attachments/1/translations>

17

- 1  
2  
3 10 O'Callaghan J, Bermingham M, Leonard M, et al. Assessing awareness and attitudes of healthcare  
4 professionals on the use of biosimilar medicines: A survey of physicians and pharmacists in Ireland. *Regul*  
5 *Toxicol Pharmacol* 2017;88:252–61.  
6  
7 11 O'Callaghan J, Barry SP, Bermingham M, et al. Regulation of biosimilar medicines and current perspectives of  
8 interchangeability and policy. *Eur J Clin Pharmacol* 2019;75(1):1–11.  
9  
10 12 Leonard E, Wascovich M, Oskuei S, et al. Factors Affecting Health Care Provider Knowledge and Acceptance  
11 of Biosimilar Medicines: A Systematic Review. *J Manag Care Spec Pharm.* 2019;25(1):102–12.  
12  
13 13 Åkesson KM, Saveman B-I, Nilsson G. Health care consumers' experiences of information communication  
14 technology – A summary of literature. *Int J Med Inform* 2007;76:633–45.  
15  
16 14 Tong A, Sainsbury P, Graig J. Consolidated criteria for reporting qualitative research (COREQ): a 32-item  
17 checklist for interviews and focus groups. *Int J Qual Health Care* 2007;19(6):349–57.  
18  
19 15 Joanna Briggs Institute. Reviewers' manual 2014. Updated 2014. Accessed 27 Jun 2019:  
20 <http://joannabriggs.org/assets/docs/sumari/reviewersmanual-2014.pdf>  
21  
22 16 Swedish Agency for Health Technology Assessment and Assessment of Social Services. Evaluation and  
23 synthesis of studies using qualitative methods of analysis. Updated 2016. Accessed 27 Jun 2019:  
24 [www.sbu.se/globalassets/ebm/metodbok/sbuhandbook\\_qualitativemethodsofanalysis.pdf](http://www.sbu.se/globalassets/ebm/metodbok/sbuhandbook_qualitativemethodsofanalysis.pdf)  
25  
26 17 Akhmetov I, Farista R, Thimmaraju PK. A Study to Assess the Awareness of the Biosimilars among Ukrainian  
27 Physicians. *J Bioanal Biomed* 2015;7(2):66–9.  
28  
29 18 Aladul MI, Fitzpatrick RW, Chapman SR. Differences in UK healthcare professionals' knowledge, attitude and  
30 practice towards infliximab and insulin glargine biosimilars. *Int J Pharm Pract* 2019;27(2):214–7.  
31  
32 19 Aladul MI, Fitzpatrick RW, Chapman SR. Healthcare professionals' perceptions and perspectives on biosimilar  
33 medicines and the barriers and facilitators to their prescribing in UK: a qualitative study. *BMJ Open*  
34 2018;8:e023603.  
35  
36 20 Baji P, Gulácsi L, Golovics PA, et al. Perceived Risks Contra Benefits of Using Biosimilar Drugs in Ulcerative  
37 Colitis: Discrete Choice Experiment among Gastroenterologists. *Value Health Reg Issues* 2016a;10C:85–90.  
38  
39 21 Baji P, Gulácsi L, Lovász BD, et al. Treatment preferences of originator versus biosimilar drugs in Crohn's  
40 disease; discrete choice experiment among gastroenterologists. *Scand J Gastroenterol* 2016b;51:22–7.  
41  
42 22 Beck M, Michel B, Rybarzyck-Vigouret MC, et al. Rheumatologists' Perceptions of Biosimilar Medicines  
43 Prescription: Findings from a French Web-Based Survey. *BioDrugs* 2016;30:585–92.  
44  
45 23 Chapman SR, Fitzpatrick RW, Aladul MI. Knowledge, attitude and practice of healthcare professionals  
46 towards infliximab and insulin glargine biosimilars: result of a UK web-based survey. *BMJ Open* 2017;7:e016730.  
47  
48 24 Danese S, Fiorino G, Michetti P. Changes in Biosimilar Knowledge among European Crohn's Colitis  
49 Organization [ECCO] Members: An Updated Survey. *J Crohns Colitis* 2016;10(11):1362–5.  
50  
51 25 Danese S, Fiorino G, Michetti P. Viewpoint: Knowledge and viewpoints on biosimilar monoclonal antibodies  
52 among members of the European Crohn's and Colitis Organization. *J Crohns Colitis* 2014;8:1548–50.  
53  
54 26 O'Dolinar RO, Reilly MS. Biosimilars naming, label transparency and authority of choice - survey findings  
55 among European physicians. *GaBI J* 2014;3(2):58–62.  
56  
57 27 van der Overbeeke E, DE Beleyr B, de Hoon J, et al. Perception of Originator Biologics and Biosimilars: A  
58 survey among Belgian rheumatoid arthritis patients and rheumatologists. *BioDrugs* 2017;31:447–59.  
59  
60 28 Sullivan E, Piercy J, Waller J, et al. Assessing gastroenterologist and patient acceptance of biosimilars in  
ulcerative colitis and Crohn's disease across Germany. *PLoS One* 2017;14;12(4):e0175826.



- 1  
2  
3 29 Waller J, Sullivan E, Piercy J. Assessing physician and patient acceptance of infliximab biosimilars in  
4 rheumatoid arthritis, ankylosing spondyloarthritis and psoriatic arthritis across Germany. *Patient Prefer Adher*  
5 2017;11:519–30.  
6  
7 30 Hallersten A, Fürst W, Mezzasalma R. Physicians prefer greater detail in the biosimilar label (SmPC) - Results  
8 of a survey across seven European countries. *Regul Toxicol Pharmacol* 2016;77:275-81.  
9  
10 31 Barsell A, Rengifo-Pardo M, Ehrlich A. A Survey Assessment of US Dermatologists' Perception of Biosimilars.  
11 *J Drugs Dermatol* 2017;16(6):612–5.  
12  
13 32 Cohen H, Beydoun D, Chien D, et al. Awareness, Knowledge, and Perceptions of Biosimilars Among  
14 Specialty Physicians. *Adv Ther* 2016;33:2160–72.  
15  
16 33 Felix A, Gupta A, Choen JP, et al. Barriers to market uptake of biosimilars in the US. *GaBI J* 2014;3(3):108–  
17 15.  
18  
19 34 Grabowski D, Henderson B, Lam D, et al. Attitudes towards subsequent entry biologics/biosimilars: A survey  
20 of Canadian rheumatologists. *Clin Rheumatol* 2015;34:1427–33.  
21  
22 35 Reilly MS, Murby SP. A survey of Australian prescribers' views on the naming and substitution of biologicals.  
23 *GaBI J* 2017;8(3):107–13.  
24  
25 36 Hemmington A, Dalbeth N, Jarreett P, et al. Medical specialists' attitudes to prescribing biosimilars.  
26 *Pharmacoepidemiol Drug Saf* 2017;26:570–7.  
27  
28 37 Gewanter HL, Reilly MS. Prescribing practices for biosimilars: questionnaire survey findings from physicians in  
29 Argentina, Brazil, Colombia and Mexico. *GaBI J* 2015;4(4):161–6.  
30  
31 38 Farhat F, Othman A, el Karak F, et al. Review and results of a survey about biosimilars prescription and  
32 challenges in the Middle East and North Africa region. *Springer Plus* 2016;5(2113):1–9.  
33  
34 39 de Bekker-Grob EW, Ryan M, Gerard K. Discrete choice experiments in health economics: a review of the  
35 literature. *HealthEcon* 2012; 21:145–72.  
36  
37 40 Sipilä R, Helin-Salmivaara A, Korhonen MJ, et al. Change in antihypertensive drug prescribing after guideline  
38 implementation: a controlled before and after study. *BMC Fam Pract* 2011;12(87):1–12.  
39  
40 41 Solomon DH, Van Houten L, Glynn RJ, et al. Academic detailing to improve use of broad-spectrum  
41 antibiotics at an academic medical center. *Arch Intern Med* 2001;161(15):1897–902.  
42  
43 42 O'Brien MA, Rogers S, Jamtvedt G, et al. Educational outreach visits: effects on professional practice and  
44 health care outcomes. *Cochrane Database Syst Rev* 2007;17(4):CD000409  
45  
46 43 National Resource Center for Academic Detailing. Introductory Guide to Academic Detailing. Updated 2017.  
47 Accessed 16 Jul 2019: [www.narcad.org/uploads/5/7/9/5/57955981/introductory\\_guide\\_to\\_ad.pdf](http://www.narcad.org/uploads/5/7/9/5/57955981/introductory_guide_to_ad.pdf)  
48  
49 44 Simon SR, Rodriguez HP, Majumdar SR, et al. Economic analysis of a randomized trial of academic detailing  
50 interventions to improve use of antihypertensive medications. *J Clin Hypertens (Greenwich)* 2007;9(1):15–20.  
51  
52 45 Patel B, Afghan S. Effects of an educational outreach campaign (IMPACT) on depression management  
53 delivered to general practitioners in one primary care trust. *Ment Health Fam Med* 2009;6(3):155–62.  
54  
55 46 Moorkens E, Vulto AG, Huys I, et al. Policies for biosimilar uptake in Europe: An overview. *PLoS One*  
56 2017;12(12):e0190147.  
57  
58 47 Cook JW, McGrath MK, Dixon MD, et al. Academic oncology clinicians' understanding of biosimilars and  
59 information needed before prescribing. *Ther Adv Med Oncol* 2019;6(11):1758835918818335.  
60  
61 48 Cohen HP, Blauvelt A, Rifkin RM, et al. Switching Reference Medicines to Biosimilars: A Systematic Literature  
62 Review of Clinical Outcomes. *Drugs* 2018;78(4):463–78.

19

- 1  
2  
3 49 Mack A. Norway, biosimilars in different funding system. What works? *GaBI J* 2015;4(2):90–2.  
4  
5 50 Lunddahl B. Pharmacovigilance on biologicals and biosimilars: a Danish perspective. *GaBI J* 2016;5(3):123–4.  
6  
7 51 Rémuzat C, Kapuśniak A, Caban A, et al. Supply-side and demand-side policies for biosimilars: an overview  
8 in 10 European member states. *J Mark Access Health Policy* 2017;5(1):1307315.  
9  
10 52 Underhill C. Biosimilars and IBD: a switch programme using CT-P13. *Clin Pharm* 2016;8(9):266–70.  
11  
12 53 Flodmark C-E, Lilja K, Woehling H, et al. Switching from originator to biosimilar human growth hormone using  
13 dialogue teamwork: single-center experience from Sweden. *Biol Ther* 2013;3(1):35–43.  
14  
15 54 Thimmaraju PK, Rakshambikai R, Farista R, et al. Legislations on biosimilar interchangeability in the US and  
16 EU – developments far from visibility. Updated 2018. Accessed 16 Jul 2019: [www.gabionline.net/Sponsored-](http://www.gabionline.net/Sponsored-Articles/Legislations-on-biosimilar-interchangeability-in-the-US-and-EU-developments-far-from-visibility)  
17 [Articles/Legislations-on-biosimilar-interchangeability-in-the-US-and-EU-developments-far-from-visibility](http://www.gabionline.net/Sponsored-Articles/Legislations-on-biosimilar-interchangeability-in-the-US-and-EU-developments-far-from-visibility)  
18  
19 55 Cauchi R. State laws and legislation related to biologics medications and substitution of biosimilars. Updated  
20 2018. Accessed 16 Jul 2019: [www.ncsl.org/research/health/state-laws-and-legislation-related-to-biologic-](http://www.ncsl.org/research/health/state-laws-and-legislation-related-to-biologic-medications-and-substitution-of-biosimilars.aspx)  
21 [medications-and-substitution-of-biosimilars.aspx](http://www.ncsl.org/research/health/state-laws-and-legislation-related-to-biologic-medications-and-substitution-of-biosimilars.aspx)  
22  
23 56 Australian Government Department of Health. Biosimilar awareness initiative. Updated 2018. Accessed 16 Jul  
24 2019: [www.health.gov.au/internet/main/publishing.nsf/Content/biosimilar-awareness-initiative](http://www.health.gov.au/internet/main/publishing.nsf/Content/biosimilar-awareness-initiative)  
25  
26 57 Larkin H, Macdonald J, Lumsden R. Pharmacy-mediated substitution of biosimilars – a global survey  
27 benchmarking country substitution policies. *GaBI J* 2017;6(4):157–64.  
28  
29 58 Singh S. How to Conduct and Interpret Systematic Reviews and Meta-Analyses. *Clin Transl Gastroenterol*  
30 2017;8(5):e93.  
31  
32  
33  
34  
35  
36  
37  
38  
39  
40  
41  
42  
43  
44  
45  
46  
47  
48  
49  
50  
51  
52  
53  
54  
55  
56  
57  
58  
59  
60

20

1  
2  
3  
4  
5  
6  
7  
8  
9  
10  
11  
12  
13  
14  
15  
16  
17  
18  
19  
20  
21  
22  
23  
24  
25  
26  
27  
28  
29  
30  
31  
32  
33  
34  
35  
36  
37  
38  
39  
40  
41  
42  
43  
44  
45  
46  
47  
48  
49  
50  
51  
52  
53  
54  
55  
56  
57  
58  
59  
60

**FIGURE LEGENDS**

Figure 1. PRISMA flow chart explaining the study inclusion process.

For peer review only

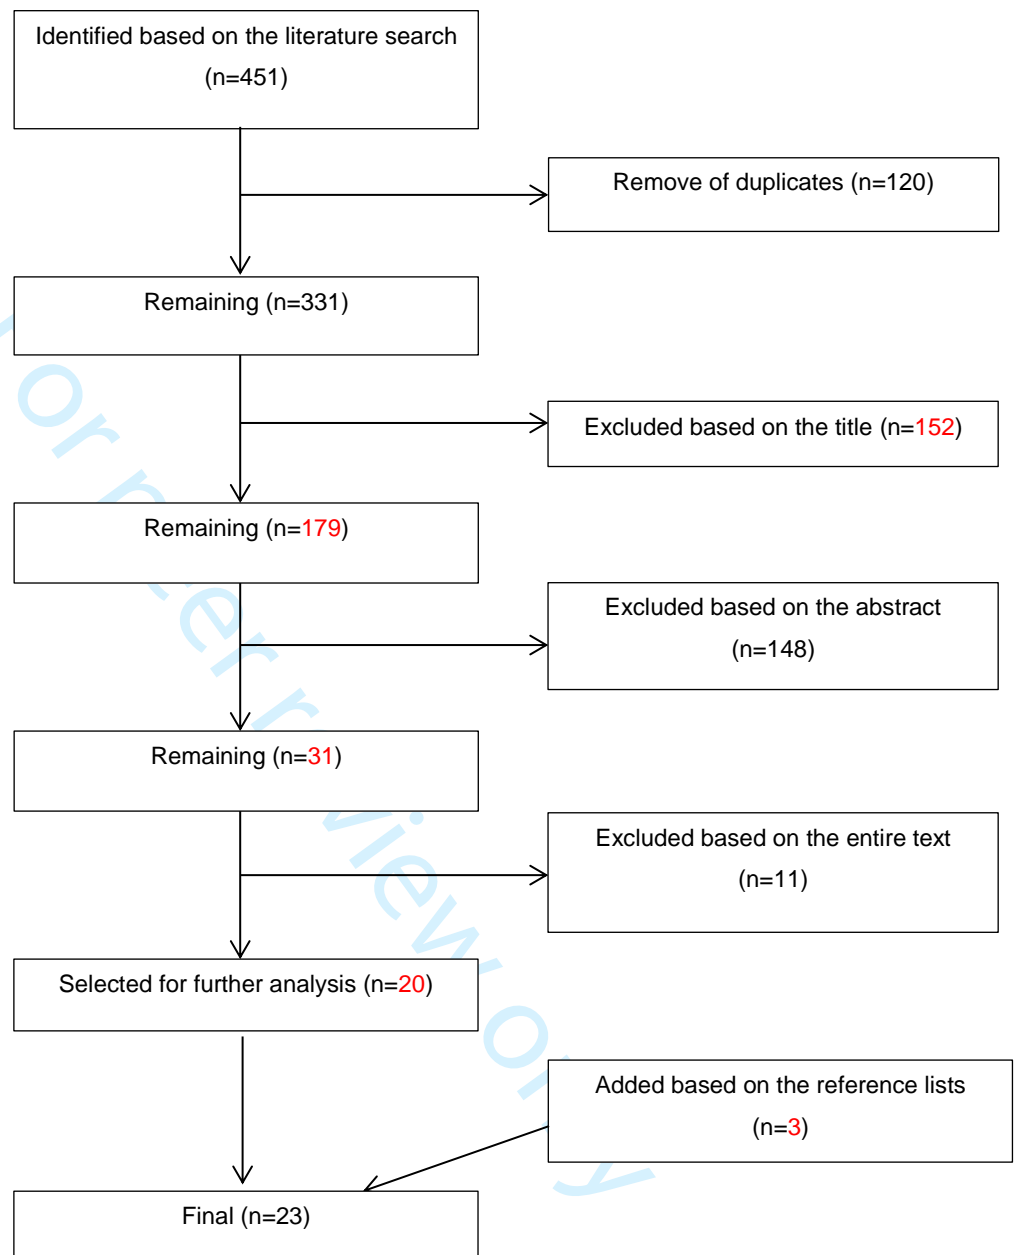

Figure 1. Flow chart on the review process.

1  
2  
3  
4  
5  
6  
7  
8  
9  
10  
11  
12  
13  
14  
15  
16  
17  
18  
19  
20  
21  
22  
23  
24  
25  
26  
27  
28  
29  
30  
31  
32  
33  
34  
35  
36  
37  
38  
39  
40  
41  
42  
43  
44  
45  
46  
47  
48  
49  
50  
51  
52  
53  
54  
55  
56  
57  
58  
59  
60

For peer review only

## Appendix 1. Literature search approach.

| Database     | Search terms                                                                                                                                                                                                                                                                                                                                                                                                                                                                                                                                                                                                                                                                                                                                                                                                                                                                                                                                                                                                                                                                                                                                                                                                                                                                                                                                                                                                                                                                                                                                                                                                                                             |
|--------------|----------------------------------------------------------------------------------------------------------------------------------------------------------------------------------------------------------------------------------------------------------------------------------------------------------------------------------------------------------------------------------------------------------------------------------------------------------------------------------------------------------------------------------------------------------------------------------------------------------------------------------------------------------------------------------------------------------------------------------------------------------------------------------------------------------------------------------------------------------------------------------------------------------------------------------------------------------------------------------------------------------------------------------------------------------------------------------------------------------------------------------------------------------------------------------------------------------------------------------------------------------------------------------------------------------------------------------------------------------------------------------------------------------------------------------------------------------------------------------------------------------------------------------------------------------------------------------------------------------------------------------------------------------|
| MedLine Ovid | <p>(attitude* or stance* or opinion* or position* or orientat* or insight* or esteem* or estimat* or percepti* or belie* or decision* or decide* or determin* or prescrib* or chose* or choos* or choice* or guid* or recommend* or commission* or adopt* or accept* or uptak* best practice).mp AND (((physician.mp. or Physicians/) OR (clinician* or doctor* or specialist* or consultant*).mp.) AND (exp dermatology/ or exp internal medicine/ or exp endocrinology/ or exp gastroenterology/ or exp rheumatology/))</p> <p>OR (exp general practice/ or exp family practice/ or exp general practitioners/ or exp hospitalists/ or exp physicians, family/ or exp physicians, primary care/or physician.mp. or Physicians/ or (clinician* or doctor* or specialist* or consultant*).mp.) AND (exp DIABETES MELLITUS/ or diabetes.mp.)) AND (exp Biosimilar Pharmaceuticals/ or biosimilar*.mp.)</p> <p>(attitude* or stance* or opinion* or position* or orientat* or insight* or esteem* or estimat* or percepti* or belie* or decision* or decide* or determin* or prescrib* or chose* or choos* or choice* or guid* or recommend* or commission* or adopt* or accept* or uptak* best practice).mp AND (((Physicians/ or (physician* or clinician* or doctor* or specialist* or consultant*).mp.) AND (exp Biosimilar Pharmaceuticals/ or biosimilar*.mp.)</p>                                                                                                                                                                                                                                                                                   |
| Scopus       | <p>TITLE-ABS-KEY ( biosimilar* AND ( ( ( physician* OR clinician* OR doctor* OR specialist* OR consultant* ) W/20 ( rheumatology OR gastroenterology OR endocrinology OR dermatology OR diabetes OR "internal medicine" ) ) OR ( rheumatologist* OR gastroenterologist* OR endocrinologist* OR dermatologist* OR hospitalist OR "General Practitioner*" OR physicians W/2 family ) ) AND</p> <p>( attitude* OR stance* OR opinion* OR position* OR orientat* OR insight* OR esteem* OR estimat* OR percepti* OR belie* OR decision* OR decide* OR determin* OR prescrib* OR choice* OR choos* OR chose* OR "best practice" OR guid* OR guide* OR recommend* OR commission* OR adopt* OR accept* OR uptak* ) ) AND ( LIMIT-TO ( SRCTYPE , "j " ) OR</p> <p>LIMIT-TO ( SRCTYPE , "p " ) ) AND ( LIMIT-TO ( DOCTYPE , "ar " ) OR</p> <p>LIMIT-TO ( DOCTYPE , "re " ) OR LIMIT-TO ( DOCTYPE , "cp " ) OR LIMIT-TO ( DOCTYPE , "ip " ) ) AND ( LIMIT-TO ( LANGUAGE , "English " ) )</p> <p>TITLE-ABS-KEY(biosimilar* AND ( physician* OR clinician* OR doctor* OR specialist* OR consultant* ) AND (attitude* OR stance* OR opinion* OR position* OR orientat* OR insight* OR esteem* OR estimat* OR percepti* OR belie* OR decision* OR decide* OR determin* OR prescrib* OR choice* OR choos* OR chose* OR "best practice" OR guid* OR guide* OR recommend* OR commission* OR adopt* OR accept* OR uptak*)) AND ( LIMIT-TO ( SRCTYPE,"j " ) OR LIMIT-TO ( SRCTYPE,"p " ) ) AND</p> <p>( LIMIT-TO ( DOCTYPE,"ar " ) OR LIMIT-TO ( DOCTYPE,"re " ) OR LIMIT-TO ( DOCTYPE,"cp " ) OR LIMIT-TO ( DOCTYPE,"ip " ) ) AND ( LIMIT-TO ( LANGUAGE,"English " ) )</p> |

## Appendix 2. Quality assessment protocol.

Date:

Evaluator:

Authors:

Title:

| Design                                                                                                 |             |             |            |       | Yes |
|--------------------------------------------------------------------------------------------------------|-------------|-------------|------------|-------|-----|
| Meta-analysis                                                                                          |             |             |            |       |     |
| Randomized controlled trial                                                                            |             |             |            |       |     |
| Systematic review                                                                                      |             |             |            |       |     |
| Quantitative study: type (survey, pilot, other)                                                        |             |             |            |       |     |
| Qualitative study: type (interview, focus group, other)                                                |             |             |            |       |     |
| Other, what?                                                                                           |             |             |            |       |     |
|                                                                                                        | Yes<br>(1p) | Partly (½p) | No<br>(0p) | Notes |     |
| <b>Aim and context</b>                                                                                 |             |             |            |       |     |
| 1 Is there an explicit aim?                                                                            |             |             |            |       |     |
| 2 Is the context described?                                                                            |             |             |            |       |     |
| <b>Methodology</b>                                                                                     |             |             |            |       |     |
| 3 Is the data collection described accurately and is it repeatable?                                    |             |             |            |       |     |
| 4 Is the sample selection preventative/relevant/not strategic (sample selected intentionally)?         |             |             |            |       |     |
| 5 Is the dropout described?                                                                            |             |             |            |       |     |
| 6 Is the data analysis described accurately and is it repeatable?                                      |             |             |            |       |     |
| 7 Are the (statistical or other) methods adequate and applicable in relation to the aims of the study? |             |             |            |       |     |
| <b>Results</b>                                                                                         |             |             |            |       |     |
| 8 Are the findings logic, reliable and clearly displayed?                                              |             |             |            |       |     |
| <b>Discussion and conclusions</b>                                                                      |             |             |            |       |     |
| 9 Is there a critical discussion on the findings?                                                      |             |             |            |       |     |
| 10 Is there a critical discussion on the method?                                                       |             |             |            |       |     |
| 11 Is there a new value?                                                                               |             |             |            |       |     |
| 12 Are the aims of the study met in the results and findings of the study?                             |             |             |            |       |     |
| 13 Are the instruments valid?                                                                          |             |             |            |       |     |
| 14 Are the instruments reliable?                                                                       |             |             |            |       |     |
| <b>Ethics</b>                                                                                          |             |             |            |       |     |
| 15 Is there an ethical discussion?                                                                     |             |             |            |       |     |
| 16 Are the authors non-dependable and free of any conflicts of interest?                               |             |             |            |       |     |
| 17 Did the participants participate without receiving a fee?                                           |             |             |            |       |     |
| <b>TOTAL POINTS</b>                                                                                    |             |             |            |       |     |

Quality assessment (rounded upwards when necessary): high:  $\geq 15$  yes, moderate: 12-14.5 yes, low:  $< 12$  yes

Quality assessment protocol adapted from the protocols of Åkesson et al. (2006), Tong et al. (2007), Joanna Briggs Institute (2014) and Swedish Agency for Health Technology Assessment and Assessment of Social Services (2016).

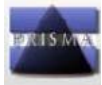

# PRISMA 2009 Checklist

1  
2  
3  
4  
5  
6  
7  
8  
9  
10  
11  
12  
13  
14  
15  
16  
17  
18  
19  
20  
21  
22  
23  
24  
25  
26  
27  
28  
29  
30  
31  
32  
33  
34  
35  
36  
37  
38  
39  
40  
41  
42  
43  
44  
45  
46  
47

| Section/topic                                                                                                                              | #  | Checklist item                                                                                                                                                                                                                                                                                              | Reported on section (in the main document without)                                                    |
|--------------------------------------------------------------------------------------------------------------------------------------------|----|-------------------------------------------------------------------------------------------------------------------------------------------------------------------------------------------------------------------------------------------------------------------------------------------------------------|-------------------------------------------------------------------------------------------------------|
| <b>TITLE</b>                                                                                                                               |    |                                                                                                                                                                                                                                                                                                             |                                                                                                       |
| Title                                                                                                                                      | 1  | Identify the report as a systematic review, meta-analysis, or both.                                                                                                                                                                                                                                         | Title page, p1                                                                                        |
| <b>ABSTRACT</b>                                                                                                                            |    |                                                                                                                                                                                                                                                                                                             |                                                                                                       |
| Structured summary                                                                                                                         | 2  | Provide a structured summary including, as applicable: background; objectives; data sources; study eligibility criteria, participants, and interventions; study appraisal and synthesis methods; results; limitations; conclusions and implications of key findings; systematic review registration number. | Title page, p1, according to BMJ Open abstract structure                                              |
| <b>INTRODUCTION</b>                                                                                                                        |    |                                                                                                                                                                                                                                                                                                             |                                                                                                       |
| Rationale                                                                                                                                  | 3  | Describe the rationale for the review in the context of what is already known.                                                                                                                                                                                                                              | Introduction, starting from p2                                                                        |
| Objectives                                                                                                                                 | 4  | Provide an explicit statement of questions being addressed with reference to participants, interventions, comparisons, outcomes, and study design (PICOS).                                                                                                                                                  | Objectives (at the last paragraph of the Introduction), p2                                            |
| <b>METHODS</b>                                                                                                                             |    |                                                                                                                                                                                                                                                                                                             |                                                                                                       |
| Protocol and registration                                                                                                                  | 5  | Indicate if a review protocol exists, if and where it can be accessed (e.g., Web address), and, if available, provide registration information including registration number.                                                                                                                               | Material and methods, paragraph: Quality assessment, with an appendix and appropriate referencing, p3 |
| Eligibility criteria                                                                                                                       | 6  | Specify study characteristics (e.g., PICOS, length of follow-up) and report characteristics (e.g., years considered, language, publication status) used as criteria for eligibility, giving rationale.                                                                                                      | Tables 1 and 2                                                                                        |
| Information sources                                                                                                                        | 7  | Describe all information sources (e.g., databases with dates of coverage, contact with study authors to identify additional studies) in the search and date last searched.                                                                                                                                  | Appendix 1 in the Supplementary Files                                                                 |
| Search                                                                                                                                     | 8  | Present full electronic search strategy for at least one database, including any limits used, such that it could be repeated.                                                                                                                                                                               | Appendix 1 in the Supplementary Files                                                                 |
| Study selection                                                                                                                            | 9  | State the process for selecting studies (i.e., screening, eligibility, included in systematic review, and, if applicable, included in the meta-analysis).                                                                                                                                                   | Material and methods: Literature search, p2–3 and Table 1, p3                                         |
| Data collection process                                                                                                                    | 10 | Describe method of data extraction from reports (e.g., piloted forms, independently, in duplicate) and any processes for obtaining and confirming data from investigators.                                                                                                                                  | Material and methods: Data extraction and analysis, p3                                                |
| Data items                                                                                                                                 | 11 | List and define all variables for which data were sought (e.g., PICOS, funding sources) and any assumptions and simplifications made.                                                                                                                                                                       | Material and methods: Data extraction and analysis, p3                                                |
| Risk of bias in individual studies                                                                                                         | 12 | Describe methods used for assessing risk of bias of individual studies (including specification of whether this was done at the study or outcome level), and how this information is to be used in any data synthesis.                                                                                      | Material and methods: Quality assessment, p3 and Table 3                                              |
| Summary measures                                                                                                                           | 13 | State the principal summary measures (e.g., risk ratio, difference in means).                                                                                                                                                                                                                               | Not applicable                                                                                        |
| Synthesis of results                                                                                                                       | 14 | Describe the methods of handling data and combining results of studies, if done, including measures of consistency (e.g., $I^2$ ) for each meta-analysis.                                                                                                                                                   | Not applicable                                                                                        |
| For peer review only - <a href="http://bmjopen.bmj.com/site/about/guidelines.xhtml">http://bmjopen.bmj.com/site/about/guidelines.xhtml</a> |    |                                                                                                                                                                                                                                                                                                             |                                                                                                       |



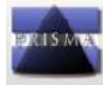

# PRISMA 2009 Checklist

Page 1 of 2

| Section/topic                 | #  | Checklist item                                                                                                                                                                                           | Reported on section                     |
|-------------------------------|----|----------------------------------------------------------------------------------------------------------------------------------------------------------------------------------------------------------|-----------------------------------------|
| Risk of bias across studies   | 15 | Specify any assessment of risk of bias that may affect the cumulative evidence (e.g., publication bias, selective reporting within studies).                                                             | Table 3                                 |
| Additional analyses           | 16 | Describe methods of additional analyses (e.g., sensitivity or subgroup analyses, meta-regression), if done, indicating which were pre-specified.                                                         | Not applicable                          |
| <b>RESULTS</b>                |    |                                                                                                                                                                                                          |                                         |
| Study selection               | 17 | Give numbers of studies screened, assessed for eligibility, and included in the review, with reasons for exclusions at each stage, ideally with a flow diagram.                                          | Figure 1                                |
| Study characteristics         | 18 | For each study, present characteristics for which data were extracted (e.g., study size, PICOS, follow-up period) and provide the citations.                                                             | Table 2                                 |
| Risk of bias within studies   | 19 | Present data on risk of bias of each study and, if available, any outcome level assessment (see item 12).                                                                                                | Table 3                                 |
| Results of individual studies | 20 | For all outcomes considered (benefits or harms), present, for each study: (a) simple summary data for each intervention group (b) effect estimates and confidence intervals, ideally with a forest plot. | Not applicable                          |
| Synthesis of results          | 21 | Present results of each meta-analysis done, including confidence intervals and measures of consistency.                                                                                                  | Not applicable                          |
| Risk of bias across studies   | 22 | Present results of any assessment of risk of bias across studies (see item 15).                                                                                                                          | Results: Quality assessment, Table 3    |
| Additional analysis           | 23 | Give results of additional analyses, if done (e.g., sensitivity or subgroup analyses, meta-regression [see item 16]).                                                                                    | Not applicable                          |
| <b>DISCUSSION</b>             |    |                                                                                                                                                                                                          |                                         |
| Summary of evidence           | 24 | Summarize the main findings including the strength of evidence for each main outcome; consider their relevance to key groups (e.g., healthcare providers, users, and policy makers).                     | Discussion, p14 onwards, Tables 2 and 3 |
| Limitations                   | 25 | Discuss limitations at study and outcome level (e.g., risk of bias), and at review-level (e.g., incomplete retrieval of identified research, reporting bias).                                            | Discussion, p14 onwards                 |
| Conclusions                   | 26 | Provide a general interpretation of the results in the context of other evidence, and implications for future research.                                                                                  | Conclusions, p14 onwards                |
| <b>FUNDING</b>                |    |                                                                                                                                                                                                          |                                         |
| Funding                       | 27 | Describe sources of funding for the systematic review and other support (e.g., supply of data); role of funders for the systematic review.                                                               | Funding, p15                            |

From: Moher D, Liberati A, Tetzlaff J, Altman DG, The PRISMA Group (2009). Preferred Reporting Items for Systematic Reviews and Meta-Analyses: The PRISMA Statement. PLoS Med 6(7): e1000097. doi:10.1371/journal.pmed1000097

For more information, visit: [www.prisma-statement.org](http://www.prisma-statement.org).

Page 2 of 2

For peer review only - <http://bmjopen.bmj.com/site/about/guidelines.xhtml>

# BMJ Open

## Physicians' perceptions of the uptake of biosimilars - A systematic review

|                                 |                                                                                                                                                                                                                                                                                                                                                                   |
|---------------------------------|-------------------------------------------------------------------------------------------------------------------------------------------------------------------------------------------------------------------------------------------------------------------------------------------------------------------------------------------------------------------|
| Journal:                        | <i>BMJ Open</i>                                                                                                                                                                                                                                                                                                                                                   |
| Manuscript ID                   | bmjopen-2019-034183.R3                                                                                                                                                                                                                                                                                                                                            |
| Article Type:                   | Original research                                                                                                                                                                                                                                                                                                                                                 |
| Date Submitted by the Author:   | 01-Apr-2020                                                                                                                                                                                                                                                                                                                                                       |
| Complete List of Authors:       | Sarnola, Kati; Finnish Medicines Agency Fimea, Assessment of Pharmacotherapies<br>Merikoski, Merja; City of Kuopio; Finnish Medicines Agency Fimea, Assessment of Pharmacotherapies<br>Jyrkka, Johanna; Finnish Medicines Agency Fimea, Assessment of Pharmacotherapies<br>Hämeen-Anttila, Katri; Finnish Medicines Agency Fimea, Assessment of Pharmacotherapies |
| <b>Primary Subject Heading</b>: | Health policy                                                                                                                                                                                                                                                                                                                                                     |
| Secondary Subject Heading:      | Health economics                                                                                                                                                                                                                                                                                                                                                  |
| Keywords:                       | biosimilar, biologic medicine, physician, perception                                                                                                                                                                                                                                                                                                              |
|                                 |                                                                                                                                                                                                                                                                                                                                                                   |

SCHOLARONE™  
Manuscripts



I, the Submitting Author has the right to grant and does grant on behalf of all authors of the Work (as defined in the below author licence), an exclusive licence and/or a non-exclusive licence for contributions from authors who are: i) UK Crown employees; ii) where BMJ has agreed a CC-BY licence shall apply, and/or iii) in accordance with the terms applicable for US Federal Government officers or employees acting as part of their official duties; on a worldwide, perpetual, irrevocable, royalty-free basis to BMJ Publishing Group Ltd ("BMJ") its licensees and where the relevant Journal is co-owned by BMJ to the co-owners of the Journal, to publish the Work in this journal and any other BMJ products and to exploit all rights, as set out in our [licence](#).

The Submitting Author accepts and understands that any supply made under these terms is made by BMJ to the Submitting Author unless you are acting as an employee on behalf of your employer or a postgraduate student of an affiliated institution which is paying any applicable article publishing charge ("APC") for Open Access articles. Where the Submitting Author wishes to make the Work available on an Open Access basis (and intends to pay the relevant APC), the terms of reuse of such Open Access shall be governed by a Creative Commons licence – details of these licences and which [Creative Commons](#) licence will apply to this Work are set out in our licence referred to above.

Other than as permitted in any relevant BMJ Author's Self Archiving Policies, I confirm this Work has not been accepted for publication elsewhere, is not being considered for publication elsewhere and does not duplicate material already published. I confirm all authors consent to publication of this Work and authorise the granting of this licence.

1

## Physicians' perceptions of the uptake of biosimilars - A systematic review

Kati Sarnola<sup>1\*</sup>, Merja Merikoski<sup>1,2</sup>, Johanna Jyrkkä<sup>1</sup>, Katri Hämeen-Anttila<sup>1</sup>

<sup>1</sup> Finnish Medicines Agency, P.O.Box 55, 000034 FIMEA, Finland

<sup>2</sup> City of Kuopio, Finland

\* Corresponding author: Kati Sarnola, kati.sarnola@gmail.com, +358 29 522 35 24, ORCID: 0000-0003-1300-7482

### WORD COUNT

Word count (excluding title page, abstract, references, figures, tables and appendices): 3279

### ABSTRACT

**Objectives:** To examine physicians' perceptions of the uptake of biosimilars

**Design:** Systematic review

**Data Sources:** MedLine Ovid and Scopus databases at the end of 2018.

**Eligibility Criteria:** Original scientific studies written in English that addressed physicians' perceptions of the uptake of biosimilars.

**Data extraction and synthesis:** The search resulted in altogether 451 studies and 331 after removing duplicates. Two researchers examined these based on the title, abstract and entire text, resulting in twenty studies. The references in these 20 studies were screened and three further studies were included. The data of these 23 studies were extracted. All the publications were quality assessed by two researchers.

**Results:** Most of the selected studies were conducted in Europe, and commonly utilized short surveys. Physicians' familiarity with biosimilars varied: 49–76% were familiar with biosimilars while 2–25% did not know what biosimilars were, the percentages varying from study to study. Their measured knowledge was generally more limited compared to their self-assessed knowledge. Physicians' perceptions of biosimilars also varied: 54–94% were confident prescribing biosimilars, while 65–67% had concerns regarding these medicines. Physicians seemed to prefer originator products to biosimilars, and prescribed biosimilars mainly for biologic-naïve patients. They considered cost savings and the lower price compared with the originator biologic medicine as the main advantages of biosimilars, while their doubts were often related to safety, efficacy and immunogenicity. 64–95% of physicians had negative perceptions of pharmacist-led substitution of biologic medicines.

**Conclusions:** Physicians' knowledge of and attitudes towards biosimilars vary. Although physicians had positive attitudes towards biosimilars, prescribing was limited, especially for patients already being treated with biologic medicines. Perceptions of pharmacist-led substitution of biologic medicines were often negative. Education and national recommendations for switching and substitution of biologic medicines are needed to support the uptake of biosimilars.

### STRENGTHS AND LIMITATIONS OF THIS STUDY

- This is the first systematic review conducted solely on physicians' perceptions regarding the uptake of biosimilars.
- The literature search was conducted with the help of an experienced information specialist.
- Publications selected for this review were quality evaluated by two researchers independently.
- The quality evaluation protocol was compiled from four existing evaluation protocols.
- The data in the studies included in this review were mainly collected before 2017.

2

## KEYWORDS

biosimilar, biologic medicine, physician, perception, systematic review

## 1 INTRODUCTION

Biologic medicines consist of one or multiple biologic active substances and are often manufactured through biotechnology<sup>1-2</sup>. They were first developed mainly for rare diseases, but have also improved the treatment of many common diseases such as diabetes, arthritis and psoriasis<sup>1</sup>. The flipside of this transformation are the high costs of biologic medicines, which have contributed to increased medical costs globally<sup>3</sup>.

Biosimilars are biologic medicines highly similar to the originator biologic medicines and with the same standards of quality, safety and efficacy<sup>2-4</sup>. Biosimilars are not clinically meaningfully different from the existing reference product. They are not regarded as generic medicines due to the complex manufacturing process and the natural variability between manufacturing batches of biologic medicines. The comparability of the product with the reference product has to be demonstrated, but clinical trials are not required. As a result, biosimilars can be brought to the market at a lower cost in comparison with the originator biologic product. The uptake of biosimilars could lead to healthcare cost savings and better patient access to costly biologic therapies<sup>5</sup>. By the end of 2018, 50 biosimilars had received marketing authorisation in Europe and 15 in the United States<sup>6-7</sup>.

Despite their demonstrated comparability and cost-saving potential, biosimilars have not fully penetrated the market of biologic medicines. The European Union accounts for 80% of the global biosimilar market, but biosimilars constitute only 1% of the total sales of biologic medicines<sup>8-9</sup>. It has been stated that decisions to select biologic medicines may be either policy driven or made by individual physicians, which has raised the need to assess the prescribing of biosimilars in a critical manner<sup>10-11</sup>. Physicians' reluctance to prescribe biosimilars may restrict potential savings in medical costs that could enable biologic treatment of larger patient populations and provide more cost-effective treatment, as similar benefits could be gained by using less expensive treatments. Therefore, it is vital to study physicians' attitudes towards and perceptions of the uptake of biosimilars. The published information on the topic is somewhat contradictory. A previous systematic review focused on health care providers' knowledge, perceptions and prescribing behaviors of biosimilar medicines<sup>12</sup>. As the role of physicians is critical in the uptake of biosimilars and gaining the cost-saving potential, a wider understanding of physicians' perceptions of the uptake of biosimilars with a critical quality evaluation of the published literature was needed. Thus, the aim of this systematic review was to examine physicians' perceptions of the uptake of biosimilars.

## 2 MATERIAL AND METHODS

### Literature search

A systematic literature search was conducted in the MedLine Ovid and Scopus databases at the end of 2018. These databases provide a comprehensive selection of scientific publications from the disciplines of pharmacy and medicine. The systematic search strategy (**Appendix 1**) was constructed by the research group, and the search was conducted by an experienced information specialist.

The initial search resulted in 451 studies. After removal of duplicates (n = 120), 331 studies remained. These studies were examined based on the title, abstract and entire text by two researchers independently (KS and MM). Of the 331 studies, 152 were excluded based on the title, 148 based on the abstract and 11 based on the entire text. At each stage, the researchers shared their views of the studies, discussed possible differences of opinion

and reached a consensus opinion based on the discussion. The inclusion and exclusion criteria of this systematic review are presented in **Table 1**. A total of 20 publications were selected for further analysis. Furthermore, the reference lists of these 20 articles were screened and three further articles that met the inclusion criteria were selected and included in this review, bringing the final number of included studies to 23. The PRISMA flow chart explaining the study inclusion process is presented in **Figure 1**.

Table 1. Inclusion and exclusion criteria of studies of this systematic review.

| Inclusion criteria                                                                                                                                                                                                                                                                                                                                                                                                                                                   | Exclusion criteria                                                                                                                                                                                                                                                                                                                                                                                                                                                                                                                                                                                                        |
|----------------------------------------------------------------------------------------------------------------------------------------------------------------------------------------------------------------------------------------------------------------------------------------------------------------------------------------------------------------------------------------------------------------------------------------------------------------------|---------------------------------------------------------------------------------------------------------------------------------------------------------------------------------------------------------------------------------------------------------------------------------------------------------------------------------------------------------------------------------------------------------------------------------------------------------------------------------------------------------------------------------------------------------------------------------------------------------------------------|
| <ul style="list-style-type: none"> <li>Original primary studies</li> <li>English language</li> <li>Investigating physicians' perceptions on the uptake of biosimilars (physicians in particular or at least 45% of physicians among other healthcare professionals, although only physicians perceptions were taken into account in this review)</li> <li>Publications on the physicians' perceptions on the automatic substitution of biologic medicines</li> </ul> | <ul style="list-style-type: none"> <li>Other than original primary studies, such as reviews, conference papers, consensus papers, commentaries and letters to editors</li> <li>Other language than English</li> <li>Investigating other healthcare professionals' perceptions on the uptake of biosimilars or publications with less than 45% of physicians of all participants involved or in which the physicians' perceptions are not separated in the results of the study</li> <li>Publications on the physicians' perceptions on the automatic or generic substitution of other medicines than biologics</li> </ul> |

### Quality assessment

Each of the 23 selected studies was concisely reviewed. Quality assessment was conducted according to a protocol adapted from the protocols of Åkesson et al. (2006), Tong et al. (2007), the Joanna Briggs Institute (2014) and the Swedish Agency for Health Technology Assessment and Assessment of Social Services (2016)<sup>13–16</sup> (**Appendix 2**). The adapted protocol was developed and used in the quality evaluation because the study designs of the included studies varied and there was no single protocol that was suitable for evaluating the studies in a concise manner. Two researchers conducted quality assessments individually and then compared their reviews. Differences in opinions (n = 6) were discussed and final evaluation was reached by consensus. In the Results section of this systematic review, the studies assessed as having high quality are emphasized more than those with moderate or low assessed quality.

### Data extraction and analysis

A meta-analysis was not conducted due to the various methods and inclusion of both qualitative and quantitative approaches in the studies included in this review. The following information was extracted from the included studies: general information (authors, year of publication, and country of publication), aims, methods and results. In regard to results, seven topics for data extraction were identified based on the topics discussed in the publications and discussions within the research group. These topics concerned the physicians' 1) self-rated knowledge of biosimilars, 2) measured knowledge of biosimilars, 3) information sources about biologic medicines, 4) attitudes towards and experienced advantages and disadvantages of biosimilars, 5) actions in the initiation of biosimilars for biologic-naïve patients, 6) actions in switching between originators and biosimilars for patients already being treated with biologic medicines, and 7) thoughts on pharmacist-led substitution of biologic medicines. In the Results section of this systematic review, these seven topics are presented within four broader themes: physicians' 1) self-rated and measured knowledge of biosimilars and information sources on biologic medicines, 2) attitudes towards and experienced advantages and disadvantages of biosimilars, 3) perceptions of the treatment initiations with biosimilars and on the switches between originator biologic medicines and biosimilars, and 4) attitudes towards

4

1  
2  
3 pharmacist-led substitution of biologic medicines. All percentages presented in this article refer to the percentages  
4 shown in the included studies of physicians with a certain opinion. If more than one study investigated the topic,  
5 the ranges of percentages in these studies are shown.  
6  
7  
8

### 9 **3 RESULTS**

#### 10 **Study characteristics**

11 Physicians' perceptions of biosimilars have been studied mainly in Europe (n = 16)<sup>10, 17–30</sup> and North America (n =  
12 4)<sup>31–34</sup>. Single studies have been conducted in Australia (n = 1)<sup>35</sup>, New Zealand (n = 1)<sup>36</sup>, Central and South  
13 America (n = 1)<sup>37</sup> and with participants from multiple African, European and Middle Eastern countries (n = 1)<sup>38</sup>  
14 (**Table 2**). All the studies were published between 2014 and 2019, most of them (n = 20)<sup>10, 17, 20–22, 24–34, 35–38</sup> in 2017  
15 or earlier. The data presented in the studies were collected between 2013 and 2017. Most of the 23 selected  
16 publications utilized surveys, typically web-based questionnaires with 11–22 questions, or fully structured short  
17 interviews (n = 17)<sup>10, 17–18, 22–27, 30–32, 34, 35–38</sup>. In addition there were one qualitative interview study<sup>19</sup> and two real-  
18 world cross-sectional studies (n = 2)<sup>28–29</sup>, in which physicians filled a survey form and reported their prescribing,  
19 then recruited patients who also filled a questionnaire form to provide information on how the reported prescribing  
20 was actualized in practice. There were also discrete choice method surveys (n = 2)<sup>20–21</sup>, in which prescribers were  
21 given a hypothetical scenario and possible treatment options, and had to choose their preferred alternative<sup>39</sup>.  
22 Furthermore, there was one literature review with a survey of the market uptake of biosimilars<sup>33</sup>.  
23  
24  
25  
26  
27  
28  
29  
30  
31  
32  
33  
34  
35  
36  
37  
38  
39  
40  
41  
42  
43  
44  
45  
46  
47  
48  
49  
50  
51  
52  
53  
54  
55  
56  
57  
58  
59  
60

Table 2. Characteristics of the 23 studies included in this systematic review.

| Reference (Country or region)                         | Aims and methods                                                                                                                                                                                                                                                                                                                                                                                                                               | Results                                                                                                                                                                                                              |                                                                                                                               |                                                                                                                                                                          |                                                                                                                                                                                                                                                                                                                                                                                                                                                                                                                                                                                                                                                                                                                                                                                                                                                                                                                                                                                                                                                             |                                                                                                                                                                                                                                                                                                                                                                                                                                                                                                |                                                                                                                                                                                                                                                                                                                                                                                                                                  |                                                                                                                                                                                                                      |
|-------------------------------------------------------|------------------------------------------------------------------------------------------------------------------------------------------------------------------------------------------------------------------------------------------------------------------------------------------------------------------------------------------------------------------------------------------------------------------------------------------------|----------------------------------------------------------------------------------------------------------------------------------------------------------------------------------------------------------------------|-------------------------------------------------------------------------------------------------------------------------------|--------------------------------------------------------------------------------------------------------------------------------------------------------------------------|-------------------------------------------------------------------------------------------------------------------------------------------------------------------------------------------------------------------------------------------------------------------------------------------------------------------------------------------------------------------------------------------------------------------------------------------------------------------------------------------------------------------------------------------------------------------------------------------------------------------------------------------------------------------------------------------------------------------------------------------------------------------------------------------------------------------------------------------------------------------------------------------------------------------------------------------------------------------------------------------------------------------------------------------------------------|------------------------------------------------------------------------------------------------------------------------------------------------------------------------------------------------------------------------------------------------------------------------------------------------------------------------------------------------------------------------------------------------------------------------------------------------------------------------------------------------|----------------------------------------------------------------------------------------------------------------------------------------------------------------------------------------------------------------------------------------------------------------------------------------------------------------------------------------------------------------------------------------------------------------------------------|----------------------------------------------------------------------------------------------------------------------------------------------------------------------------------------------------------------------|
|                                                       |                                                                                                                                                                                                                                                                                                                                                                                                                                                | Self-rated knowledge                                                                                                                                                                                                 | Measured knowledge                                                                                                            | Information sources                                                                                                                                                      | Attitudes towards and experienced advantages and disadvantages of biosimilars                                                                                                                                                                                                                                                                                                                                                                                                                                                                                                                                                                                                                                                                                                                                                                                                                                                                                                                                                                               | Initiation of biosimilars (biologic-naïve patients)                                                                                                                                                                                                                                                                                                                                                                                                                                            | Switches between originators and biosimilars (patients already treated with biologics)                                                                                                                                                                                                                                                                                                                                           | Pharmacist-led substitution of biologic medicines                                                                                                                                                                    |
| Akhmetov et al. 2015 <sup>17</sup> (Ukraine)          | Endocrinologists', oncologists', nephrologists', immunologists' and rheumatologists' awareness of biosimilars<br><br>Short interviews with eight close-ended questions, including 6 Likert-type items (n = 82), time of the study not reported                                                                                                                                                                                                 | Low to medium levels (not reported more specifically) of biosimilar awareness on a 1-5 scale, where 1=low and 5=high<br><br>Endocrinologists and nephrologists had higher levels of awareness than other respondents | N/A                                                                                                                           | Peer-reviewed journal articles (n = 35), internet (n = 31), medical conferences (n = 20), popular press (n = 9), key-opinion leaders (n = 3), drug manufacturers (n = 2) | On a 1-5 scale, likelihood of prescribing biosimilars: 68% average (specific numbers not reported), 23% below average and 9% above average<br><br>Majority (n not reported) are likely to try biosimilars in small batches, and then gradually move to larger groups of patients, endocrinologists and nephrologists showing the greatest interest<br><br>Facilitators of prescribing: 39% cost advantage, 22% certification of safety by EMA or FDA, 22% certification of efficacy by EMA or FDA, 10% propitiousness of the Cabinet of Ministers and 7% trust towards European, American and Japanese biotech companies as importers<br><br>Majority (n not reported) required 40-50% lower price for biosimilars than original biologics, endocrinologists typically accepting 20-30% discount in comparison to rheumatologists and oncologists that anticipated over 50% discount                                                                                                                                                                        | N/A                                                                                                                                                                                                                                                                                                                                                                                                                                                                                            | N/A                                                                                                                                                                                                                                                                                                                                                                                                                              | N/A                                                                                                                                                                                                                  |
| Aladul et al. 2019 <sup>18</sup> (the United Kingdom) | Knowledge and attitudes of healthcare professionals (n = 150 dermatologists, diabetologists, gastroenterologists and rheumatologists) towards infliximab and insulin glargine biosimilars<br><br>Web-based survey via selected medical associations between August 2016 and January 2017                                                                                                                                                       | 80% were aware that biosimilars were available on their local formulary                                                                                                                                              | 76% correctly considered biosimilars as copies of originators                                                                 | N/A                                                                                                                                                                      | 91% considered robust pharmacovigilance studies and 84% the costs as the most important influencer of their prescribing of biosimilars                                                                                                                                                                                                                                                                                                                                                                                                                                                                                                                                                                                                                                                                                                                                                                                                                                                                                                                      | 22% had major concerns on the efficacy and 14% on the safety of biosimilars that prevented them of starting a biosimilar                                                                                                                                                                                                                                                                                                                                                                       | 50% had major concerns on the efficacy and 34% on the safety of biosimilars in the switches                                                                                                                                                                                                                                                                                                                                      | N/A                                                                                                                                                                                                                  |
| Aladul et al. 2018 <sup>19</sup> (the United Kingdom) | Perceptions of consultants with specialities of diabetes mellitus, ulcerative colitis, Crohn's disease, rheumatoid arthritis, ankylosing spondylitis and psoriatic arthritis (n = 10) towards biosimilar infliximab, etanercept and insulin glargine and potential barriers and facilitators to their prescribing<br><br>Semi-structured interviews of purposive convenience sample of West Midlands hospital staff between June-November 2017 | N/A                                                                                                                                                                                                                  | All interviewees expressed an understanding of the concept of biosimilars and believed biosimilars were copies of originators | Conferences, pharmaceutical industry representatives, scientific journals and colleagues                                                                                 | Majority of rheumatologists and diabetologists (n not reported) would prescribe the reference product if the prices of the reference product and the biosimilar are equal<br><br>Gastroenterologists expressed more confidence and fewer concerns than other specialists, stating that indication extrapolation had previously been the major obstacle in the biosimilar uptake, but that it had been overcome<br><br>Majority of rheumatologists (n not reported) had concerns on indication extrapolation, considering their patients are very sensitive with higher multimorbid risks. Some rheumatologists (n not reported) openly declared being mistrustful on biosimilars<br><br>Facilitators of prescribing were information from societies, authorities and national registries. Barriers of prescribing were unexpected adverse effects or increase in side effects, patients' reluctance on using biosimilars, complicated, unsuitable or non-user-friendly administration device, unavailability of dose strengths in comparison to originators | Majority (n not reported) were content to initiate biosimilars<br><br>Minority of rheumatologists and diabetologists (n not reported) felt under pressure to initiate new patients with biosimilars by their organization<br><br>Two rheumatologists were happier to initiate biosimilars rather than switching                                                                                                                                                                                | All gastroenterologists (n = 7) and a minority of rheumatologists (n not reported) were content to switch patients from reference products to a biosimilar<br><br>All those that were content with switching considered that patients should be given the choice between the products<br><br>Majority of all physicians (n not reported) felt multiple switching based on cost reasons irrational                                | Majority (n not reported) has negative view on the pharmacist-led substitution of biologic medicines<br><br>Minority (n not reported) considered that automatic substitution would be accepted in the next few years |
| Baji et al. 2016a <sup>20</sup> (Hungary)             | Gastroenterologists' treatment preferences in ulcerative colitis<br><br>Discrete choice experiment survey (in which prescribers are given hypothetical scenario and possible treatment options, and they are asked to choose the alternative they prefer <sup>20</sup> ) in a Hungarian professional society meeting in 2014 (n = 51)                                                                                                          | N/A                                                                                                                                                                                                                  | N/A                                                                                                                           | N/A                                                                                                                                                                      | 20% had no concerns on biosimilars, 67% had some concerns on efficacy and/or safety and 12% did not support the use of biosimilars due to the lack of RCT evidence                                                                                                                                                                                                                                                                                                                                                                                                                                                                                                                                                                                                                                                                                                                                                                                                                                                                                          | 84% of all physicians and 80% of those who had some concerns (67%) chose biosimilar in at least one choice set<br><br>The most important attribute driving the choice: stopping rule (whether treatment after 12 months is reimbursed)<br><br>Estimated probability of choosing the originator over biosimilar in the present reimbursement situation: 48%. Probability of choosing the biosimilars with all the benefits offered over the originator in the present situation: 85% versus 15% | 61% of all and 53% of those who were concerned chose biosimilar in at least one of the choice sets<br><br>The most important attribute driving the choice: stopping rule<br><br>Estimated probability of choosing the originator over biosimilar in the present reimbursement situation: 71%. Probability of choosing the biosimilars with all the benefits offered over the originator in the present situation: 63% versus 37% | N/A                                                                                                                                                                                                                  |



|                                                        |                                                                                                                                                                                                                                                                                                                                                                                                                                                                                                                                               |                                                                                                                                                                                                                                                                                        |                                                                                                                                                                                                                                                                                                                                                                                                                                    |                                                                                                                                                           |                                                                                                                                                                                                                                                                                                                                                                                                                                                                                                                                                                                 |                                                                                                                                                                                                                                                                                                                                                                                                                                                                                                                |                                                                                                                                                                                                                                                                                                               |                                                                                                                                                                                                                                       |
|--------------------------------------------------------|-----------------------------------------------------------------------------------------------------------------------------------------------------------------------------------------------------------------------------------------------------------------------------------------------------------------------------------------------------------------------------------------------------------------------------------------------------------------------------------------------------------------------------------------------|----------------------------------------------------------------------------------------------------------------------------------------------------------------------------------------------------------------------------------------------------------------------------------------|------------------------------------------------------------------------------------------------------------------------------------------------------------------------------------------------------------------------------------------------------------------------------------------------------------------------------------------------------------------------------------------------------------------------------------|-----------------------------------------------------------------------------------------------------------------------------------------------------------|---------------------------------------------------------------------------------------------------------------------------------------------------------------------------------------------------------------------------------------------------------------------------------------------------------------------------------------------------------------------------------------------------------------------------------------------------------------------------------------------------------------------------------------------------------------------------------|----------------------------------------------------------------------------------------------------------------------------------------------------------------------------------------------------------------------------------------------------------------------------------------------------------------------------------------------------------------------------------------------------------------------------------------------------------------------------------------------------------------|---------------------------------------------------------------------------------------------------------------------------------------------------------------------------------------------------------------------------------------------------------------------------------------------------------------|---------------------------------------------------------------------------------------------------------------------------------------------------------------------------------------------------------------------------------------|
| Baji et al. 2016b <sup>21</sup> (Hungary)              | Gastroenterologists' treatment preferences in Crohn's disease<br><br>Discrete choice experiment survey (in which prescribers are given hypothetical scenario and possible treatment options, and they are asked to choose the alternative they prefer <sup>20</sup> ) in a Hungarian professional society meeting in 2014 (n = 51)                                                                                                                                                                                                            | N/A                                                                                                                                                                                                                                                                                    | N/A                                                                                                                                                                                                                                                                                                                                                                                                                                | N/A                                                                                                                                                       | 20% had no concerns on biosimilars, 65% had some concerns on efficacy and/or safety and 12% did not support the use of biosimilars due to the lack of RCT evidence<br><br>Four clinicians were classified to "No biosimilar" attitude group, 19 to the "Biosimilar to new patients only" group and 27 to the "Biosimilar" group (one clinician was excluded from the analysis)                                                                                                                                                                                                  | Men, senior consultants, working in inflammatory bowel disease centre and treating more patients were more likely to consider biosimilars for biologic-naïve patients only<br><br>Estimated probability of choosing the originator over biosimilar, when no benefits are offered for using the biosimilar: 60%.<br>Probability of choosing the biosimilar with all kinds of benefits over the originator: 89% versus 11%<br><br>The most important attribute driving the choice: continuity of medicine supply | Estimated probability of choosing the originator over biosimilar, when no benefits are offered for using the biosimilar: 74%.<br>Probability of choosing the biosimilar with all kinds of benefits over the originator: 44% versus 56%<br><br>The most important determinant of choice: type of the treatment | N/A                                                                                                                                                                                                                                   |
| Barsell et al. 2017 <sup>31</sup> (USA)                | Dermatologists' knowledge and perceptions of biosimilars, whether a practice gap exists and to study misconception and barriers to biosimilar usage<br><br>Web survey of 14 multiple-choice questions for the members of five state dermatologic societies and National Psoriasis Foundation in 2015 (n = 97)                                                                                                                                                                                                                                 | 62% responded having basic understanding of biosimilars, 27% complete understanding and 11% that they have never heard of biosimilars                                                                                                                                                  | 37% were aware that biosimilars are highly similar to the reference product, 26% described biosimilar as "generic", 27% described them as same bio-drug with equal bioequivalence and 10% said they did not know the definition. Those with complete understanding (27%), 21% incorrectly described biosimilar as "generic"                                                                                                        | 35% self-study, 25% scientific publications, 17% conferences and seminars, 3% biosimilar company-sponsored events and 20% other                           | Advantages: 71% low price to patients, 68% easier access to treatment and 65% low price to payers. Disadvantages: 71% efficacy, 66% potential switch to biosimilar without physicians' knowledge, 66% safety and 63% immunogenicity. 8% believed there were no advantages<br><br>Convincing physicians of interchangeability: 44% extensive phase I, II and III studies, 37% valid longitudinal data from patient registries, 37% same level of testing (not specified more thoroughly) than generic medicines, 36% evidence of pharmacokinetic and pharmacodynamic equivalence | 25% definitely or highly likely to prescribe a biosimilar<br><br>38% will try it on very selected patients                                                                                                                                                                                                                                                                                                                                                                                                     | N/A                                                                                                                                                                                                                                                                                                           | 88% believed that pharmacist-led substitution without consulting physicians will be allowed in the future<br><br>76% very important and 18% somewhat important to have control over whether patients receive originator or biosimilar |
| Beck et al. 2016 <sup>2</sup> (France)                 | Knowledge, experience and opinions related to biosimilars and to identify expectations, barriers and possible options to promote prescription<br><br>Web survey of 22 questions for nearly 500 rheumatologists in 2015 (n = 116)                                                                                                                                                                                                                                                                                                              | 55%/3% considered they had little/no knowledge of biosimilars<br><br>5% felt very well-informed<br><br>Hospital-based rheumatologists were likely to be more familiar with biosimilars compared to office-based rheumatologists<br><br>98% had at least one question about biosimilars | 85% thought biosimilars are similar to reference products that had gone off-patent; 85% considered biosimilars have no meaningful differences in quality, 80% in safety and 90% in efficacy; 65% thought that the assessment of biosimilarity requires more comprehensive data than generic drugs; and 46% believed that biosimilar marketing authorisation is granted on the sole investigation of pharmacokinetic bioequivalence | 84% self-study and scientific publications, 76% pharmaceutical companies, 72% continuous training, 54% physician colleagues and 13% pharmacist colleagues | 44% agree and 10% strongly agree being in favour of implementation of biosimilars<br><br>Positive factors: 90% healthcare cost savings, 61% releasing of resources allowing treating additional patients, 49% positive impact on patients' access to innovative medicines and 46% health policy-makers incentives. Barriers: 67% indication extrapolation of efficacy and safety, 66% lack of information about tolerability, 59% risk of increasing patients' concerns, 57% lack of clinical trials and 55% patients' wishes to be treated with the originator                 | 7% had already prescribed biosimilars mentioned in the survey<br><br>89% considered it was conceivable to start a treatment for biologic-naïve patients                                                                                                                                                                                                                                                                                                                                                        | 25% could envision a switch                                                                                                                                                                                                                                                                                   | 58% strongly disagree and 23% disagree of approving substitution by a pharmacist                                                                                                                                                      |
| Chapman et al. 2018 <sup>23</sup> (the United Kingdom) | Healthcare professionals' knowledge and attitudes towards infliximab and insulin glargine biosimilars and factors influencing their prescribing and compare healthcare professionals' attitudes with the utilisation of these biosimilars in hospitals<br><br>Web-based survey of 11 questions for societies of dermatology, diabetology, gastroenterology and rheumatology in 2016-2017 and drug utilisation analysis from DEFINE database in 2015-2016 (n = 234). Other stakeholders apart from physicians are not addressed in this review | N/A                                                                                                                                                                                                                                                                                    | 72% correctly thought biosimilars are similar copies of biologic medicines, 18% thought biosimilars are generic biologic medicines, 3% counterfeit medicines, 3% had heard of them but did not know what they were, 3% had never heard of them and 1% new biological medicines<br><br>75% knew biosimilars were available on their local formulary                                                                                 | N/A                                                                                                                                                       | Gastroenterologists were most frequent prescribers of biosimilars (prescribing every day or week), followed by rheumatologists, diabetologists and dermatologists<br><br>The dominant consideration: cost saving<br><br>Increasing the use of biosimilars: regulatory guidance and robust pharmacovigilance studies, local policy, potential cost saving to organisation (whether or not savings were invested in the prescribers' department) and robust cost-effectiveness data of biosimilar vs. originator                                                                  | 95% and 90% of gastroenterologists, 92% of rheumatologists, 79% of dermatologists and 75% of diabetologists had no or minor concerns on safety<br><br>90% of gastroenterologists, 88% of rheumatologists, 74% of dermatologists and 68% of diabetologists had no or minor concerns on efficacy                                                                                                                                                                                                                 | 95% of gastroenterologists, 53% of rheumatologists, 78% of dermatologists and 69% of diabetologists had no or minor concerns on safety<br><br>93% of gastroenterologists, 55% of rheumatologists, 79% of dermatologists and 65% of diabetologists had no or minor concerns on efficacy                        | N/A                                                                                                                                                                                                                                   |
| Cohen et al. 2016 <sup>32</sup> (USA)                  | Dermatologists', gastroenterologists', haematologist-oncologists', medical oncologists', nephrologists' and rheumatologists' awareness, knowledge, and                                                                                                                                                                                                                                                                                                                                                                                        | N/A                                                                                                                                                                                                                                                                                    | 92% of dermatologists, 90% of gastroenterologists, 83% of rheumatologists, 74%                                                                                                                                                                                                                                                                                                                                                     | 88% scientific journals, 73% FDA and 64% physician peers. Trust to media was less than 5%                                                                 | Generally positive attitudes towards biosimilars. Dermatologists and rheumatologists appear less enthusiastic                                                                                                                                                                                                                                                                                                                                                                                                                                                                   | N/A                                                                                                                                                                                                                                                                                                                                                                                                                                                                                                            | 91% open to switching patients to a biosimilar                                                                                                                                                                                                                                                                | N/A                                                                                                                                                                                                                                   |

|                                                                                                                 |                                                                                                                                                                                                                                                                                                                                                                                                                                                                                                                    |                                                                                                                        |                                                                                                                                                                                                                                                                                                                                                                                                             |                                                                                                                                                                                                                                                                                                                              |                                                                                                                                                                                                                                                                                                                                                                                                                                                                                                                                                                                                                                                                                                                                                                                         |                                                                                                                                                             |                                                                                                                               |                                                                                                                                                        |
|-----------------------------------------------------------------------------------------------------------------|--------------------------------------------------------------------------------------------------------------------------------------------------------------------------------------------------------------------------------------------------------------------------------------------------------------------------------------------------------------------------------------------------------------------------------------------------------------------------------------------------------------------|------------------------------------------------------------------------------------------------------------------------|-------------------------------------------------------------------------------------------------------------------------------------------------------------------------------------------------------------------------------------------------------------------------------------------------------------------------------------------------------------------------------------------------------------|------------------------------------------------------------------------------------------------------------------------------------------------------------------------------------------------------------------------------------------------------------------------------------------------------------------------------|-----------------------------------------------------------------------------------------------------------------------------------------------------------------------------------------------------------------------------------------------------------------------------------------------------------------------------------------------------------------------------------------------------------------------------------------------------------------------------------------------------------------------------------------------------------------------------------------------------------------------------------------------------------------------------------------------------------------------------------------------------------------------------------------|-------------------------------------------------------------------------------------------------------------------------------------------------------------|-------------------------------------------------------------------------------------------------------------------------------|--------------------------------------------------------------------------------------------------------------------------------------------------------|
|                                                                                                                 | perceptions of biosimilars over time (survey will be repeated in 2-3 years)<br>Survey of 19 questions in 2015-2016 (n = 1201)                                                                                                                                                                                                                                                                                                                                                                                      |                                                                                                                        | of nephrologists, 69% of haematologist-oncologists and 63% of medical oncologists were aware which of the listed medicines in their specialty were biologic<br><br>56% of rheumatologists, 33% of gastroenterologists, 31% of dermatologists, 15% of nephrologists, 9% of medical-oncologists and 3% of haematologist-oncologists incorrectly reported there are no biosimilars available                   |                                                                                                                                                                                                                                                                                                                              | 62% considered the biosimilar will have equivalent efficacy as its originator and 57% that the biosimilar will be at least as safe as the originator<br><br>58% had concerns on patient compliance and access to treatments options with originators<br><br>Positive factors: increased access and utilization of biologic medicines, expanded treatment options and provided savings for the healthcare system                                                                                                                                                                                                                                                                                                                                                                         |                                                                                                                                                             |                                                                                                                               |                                                                                                                                                        |
| Danese et al. 2016 <sup>24</sup> (Europe, countries not reported)                                               | Evolution on thinking about biosimilars one year after they had become available in the EU. Comparison to the survey published by Danese et al. 2014 <sup>24</sup><br><br>Web survey with 14 multiple-choice questions for members of European Crohn's and Colitis Organization in 2015 (n = 118)                                                                                                                                                                                                                  | 56% judged that educational activities that they were exposed to was fair and adequate, while 16% found it unnecessary | N/A                                                                                                                                                                                                                                                                                                                                                                                                         | More information was hoped from 75% medical societies, 52% multispecialty safety registries, 47% health institutions and 26% guidelines                                                                                                                                                                                      | 29% totally confident, 18% very confident and 34% confident enough (5%, 8% and 26% in 2013) to prescribe a biosimilar<br><br>Main advantage: 92% (90% in 2013) cost-sparing. Main issue: 42% the lack of data from clinical trials for all indications<br><br>27% (67% in 2013) consider biosimilars have higher immunogenicity compared to the originator and 17% (43% in 2013) different action than the originator<br><br>51% (24% in 2013) thought biosimilar should be approved for all the indications of the originator                                                                                                                                                                                                                                                          | N/A                                                                                                                                                         | 44% (6% in 2013) would switch a patient with remission                                                                        | 89% (85% in 2013) disagreed with automatic substitution by a pharmacist<br><br>13% support substitution for new prescriptions and 13% for all patients |
| Danese et al. 2014 <sup>25</sup> (Europe, countries not reported)                                               | Awareness of and readiness to use biosimilars<br><br>Web survey of 15 questions for 1,000 randomly selected European Crohn's and Colitis Organization members in 2013 (n = 307)                                                                                                                                                                                                                                                                                                                                    | N/A                                                                                                                    | 70% were aware that biosimilar is a similar copy, but not equal to the originator, 19% responded that it is a copy of biological agent, identical to the originator, like a generic                                                                                                                                                                                                                         | Preferred information: 81% multi-specialty international safety registries to monitor safety and effectiveness, 78% health institutions on the development of rules on the use of biosimilars, 66% medical societies, 61% data regarding the registration process for biosimilars and 57% multispecialty practice guidelines | 6% thought that the originator and biosimilar were interchangeable<br><br>The main advantage: cost-sparing (89%). The main issue: different immunogenicity pattern than the originator (67%)<br><br>50% agreed biosimilars can significantly reduce healthcare costs, 27% expected them only having a marginal impact, 6% expected additional costs of introduction, regulation and pharmacovigilance to offset any potential savings<br><br>24% agreed that the tested biosimilar could be approved for all indications of the originator in terms of safety and efficacy, 19% for all rheumatologic indications, 14% for the specific indication only, 3% stated that all biosimilars could be approved for all indications of the originator and 39% disagreed with all of the above | 61% felt little or no confident in using biosimilars in their everyday clinical practice, 26% confident enough, 8% very confident, and 5% totally confident | 28% would consider replacing originator with a biosimilar                                                                     | 64% against the substitution by pharmacist<br><br>18% would agree only for new patients                                                                |
| Farhat et al. 2016 <sup>26</sup> (Algeria, Belgium, Egypt, Iran, Iraq, Italy, Jordan, Lebanon, Sudan and Syria) | Parameters on the acceptance and future prescription of biosimilars and worldwide situation focusing mainly on the EU and US laws, regulations and legislative pathways, pricing and challenging market access<br><br>Survey for over 150 healthcare professional in the conference meeting in 2015 (n = 117 health care professionals responded, of which most were physicians; exact number of physicians who responded not reported). Other stakeholders apart from physicians are not addressed in this review | N/A                                                                                                                    | 66% knew what biosimilars were, 12% did not know and 22% had not answered the question. Of those who knew (66%), 62% considered biosimilars bioequivalent to originator and have all preclinical and clinical trials equal to the originator<br><br>63% agreed that biosimilars are already marketed in the Arab and Middle Eastern markets, while 45% agreed that they are manufactured in the same region | N/A                                                                                                                                                                                                                                                                                                                          | Drivers for prescribing: 69% FDA or EMA approval, 65% lower price of bioequivalence in comparison to the originator, 48% bio-efficacy, 42% safety and 31% good manufacturing practices and high reputation of the manufacturer. 5% think biosimilars don't have advantages<br><br>35% considered the cost of treatment should not overcome its effectiveness or safety/tolerance<br><br>26% thought lower prices were good news as patients will be treated with biologics<br><br>27% consider biosimilars would bring cost savings<br><br>49% trust companies highly experienced in manufacturing small-molecule generic drugs and 55% companies with prior experience in manufacturing biologics as biosimilar producers                                                              | 41% prescribe biosimilars while 33% don't (note that respondents were also other than physicians)                                                           | N/A                                                                                                                           | N/A                                                                                                                                                    |
| Felix et al. 2014 <sup>23</sup> (USA)                                                                           | Challenges and opportunities of market uptake of biosimilars from the perspectives of physicians and payers<br><br>Survey for physicians that had written about or were familiar with biosimilars based on literature                                                                                                                                                                                                                                                                                              | N/A                                                                                                                    | N/A                                                                                                                                                                                                                                                                                                                                                                                                         | N/A                                                                                                                                                                                                                                                                                                                          | Almost all physicians (n not reported) believed that if biosimilar was approved by FDA it will perform similarly to the originator with regard to safety and efficacy<br><br>Influences of decision making: efficacy and safety, out-of-pocket costs to the patient, price of treatment and immunogenicity                                                                                                                                                                                                                                                                                                                                                                                                                                                                              | Four physicians are somewhat likely, six very likely and three not likely to prescribe a biosimilar to a new patient                                        | 31%/61% (n not reported) say they are somewhat likely/very likely to switch an existing patient from originator to biosimilar | N/A                                                                                                                                                    |

|                                                                                          |                                                                                                                                                                                                                                                                                                                                                                                                                                                                                                                                                                                             |                                                                                                                                                                                                                                                            |                                                                                                                                                                                                      |                                                                                                                                                                                                                                                                                                                                                                                                                                                                                                                                                                                               |                                                                                                                                                                                                                                                                                                                                                                                                                                                                                                                                                                                                                                                                                                                                                        |                                                                                                                                                                                                                                                                                                                                                                                                                                                                                                                                                                                                                                                                                     |                                                                                                                                                                                                                                                                                                  |                                                                                                                                                 |
|------------------------------------------------------------------------------------------|---------------------------------------------------------------------------------------------------------------------------------------------------------------------------------------------------------------------------------------------------------------------------------------------------------------------------------------------------------------------------------------------------------------------------------------------------------------------------------------------------------------------------------------------------------------------------------------------|------------------------------------------------------------------------------------------------------------------------------------------------------------------------------------------------------------------------------------------------------------|------------------------------------------------------------------------------------------------------------------------------------------------------------------------------------------------------|-----------------------------------------------------------------------------------------------------------------------------------------------------------------------------------------------------------------------------------------------------------------------------------------------------------------------------------------------------------------------------------------------------------------------------------------------------------------------------------------------------------------------------------------------------------------------------------------------|--------------------------------------------------------------------------------------------------------------------------------------------------------------------------------------------------------------------------------------------------------------------------------------------------------------------------------------------------------------------------------------------------------------------------------------------------------------------------------------------------------------------------------------------------------------------------------------------------------------------------------------------------------------------------------------------------------------------------------------------------------|-------------------------------------------------------------------------------------------------------------------------------------------------------------------------------------------------------------------------------------------------------------------------------------------------------------------------------------------------------------------------------------------------------------------------------------------------------------------------------------------------------------------------------------------------------------------------------------------------------------------------------------------------------------------------------------|--------------------------------------------------------------------------------------------------------------------------------------------------------------------------------------------------------------------------------------------------------------------------------------------------|-------------------------------------------------------------------------------------------------------------------------------------------------|
|                                                                                          | review of Medline-indexed publications (n = 14). Other stakeholders apart from physicians are not addressed in this review                                                                                                                                                                                                                                                                                                                                                                                                                                                                  |                                                                                                                                                                                                                                                            |                                                                                                                                                                                                      |                                                                                                                                                                                                                                                                                                                                                                                                                                                                                                                                                                                               | 50% (n not reported) consider it is very important that there are proven chemical and pharmacokinetic similarities between originators and biosimilars<br><br>Roughly half (n not reported) consider payer and cost considerations very important                                                                                                                                                                                                                                                                                                                                                                                                                                                                                                      |                                                                                                                                                                                                                                                                                                                                                                                                                                                                                                                                                                                                                                                                                     |                                                                                                                                                                                                                                                                                                  |                                                                                                                                                 |
| Gewanter & Reilly 2014 <sup>37</sup> (Argentina, Brazil, Colombia and Mexico)            | Understanding of biosimilars, how they use them and their concerns for the future<br><br>Web-based survey for 6650 prescribers from global market research panel (n = 399)                                                                                                                                                                                                                                                                                                                                                                                                                  | 35% did not consider themselves familiar with biosimilars, meaning they could not define them or had never heard of them                                                                                                                                   | 49% were aware of differences between biologicals, biosimilars and non-comparable biologicals. 30% were unaware that clinical trials for single indication lead to approval for multiple indications | 71% seminars and conferences, 55% self-study, 32% education from biosimilar companies, 18% clinical trial participation and 4% other means<br><br>37% would like to learn from pharmaceutical companies                                                                                                                                                                                                                                                                                                                                                                                       | 88% prescribe biologicals                                                                                                                                                                                                                                                                                                                                                                                                                                                                                                                                                                                                                                                                                                                              | 50% said they believed if two biological medicines had the same non-proprietary scientific name, patient could receive either product and have the same result                                                                                                                                                                                                                                                                                                                                                                                                                                                                                                                      | 44% said they believed if two biological medicines had the same non-proprietary scientific name, patient could be safely switched during a course of treatment, and the patient would have the same result<br><br>64% would not be comfortable switching for cost reasons rather medical reasons | N/A                                                                                                                                             |
| Grabowski et al. 2015 <sup>34</sup> (Canada)                                             | Gaps in knowledge and attitudes towards biosimilars of rheumatologists<br><br>Web-based survey of 29 questions for 369 members of Canadian Rheumatology Association in February 2014 (n = 81)                                                                                                                                                                                                                                                                                                                                                                                               | 31% indicated themselves being familiar or very familiar with biosimilars<br><br>Those with greater than 20 years of practice were significantly more likely to indicate themselves familiar or very familiar than those with 20 or less years of practice | 66% considered biosimilars essentially same as generic drugs<br><br>38% were aware of Health Canada's guidance on clinical requirement for biosimilar approval                                       | N/A                                                                                                                                                                                                                                                                                                                                                                                                                                                                                                                                                                                           | 94% generally comfortable prescribing biologic medicines to their patients<br><br>31% comfortable prescribing biosimilars to their patients if biosimilar was currently available<br><br>29% declined until their colleagues recommend it<br><br>42% indicated a 30% price reduction, and a third a ≥50% price reduction being reasonable before payers mandated the use of biosimilars over brand name biologics<br><br>54% disagreed or strongly disagreed, 32% agreed or strongly agreed and 14% were neutral using biosimilars with extrapolated indications<br><br>49% not confident, 19% confident or very confident, and a third neutral on the long-term sustainability profile of the biosimilar with 30 weeks of head-to-head clinical trial | 59% consider offering biosimilars, if biosimilar demonstrates that it is comparable to the brand name drug<br><br>72% unlikely or very unlikely, 11% likely or very likely and 16% neutral to offer a biosimilar, when biologic-naïve patient is an ideal candidate, where cost is not an issue<br><br>Greater familiarity with established brand name drugs and uncertainty over the long-term safety of biosimilars were often cited among those unlikely or very unlikely offering biosimilars<br><br>54% did not typically prescribe a biosimilar, were likely or very likely to offer a biosimilar, when the provincial payer or insurance company mandated using a biosimilar | 7.5% consider switching, if biosimilar demonstrates that it is comparable to the brand name drug                                                                                                                                                                                                 | 88% concerned or very concerned if a pharmacist had the ability to substitute a biologic drug for a biosimilar without the physician's approval |
| Hallersten et al. 2016 <sup>30</sup> (France, Germany, Italy, Poland, Spain, Sweden, UK) | Preferences on type and detail of biosimilar information in Summaries of Product Characteristics (SmPC) and the use of information sources when prescribing biologics including biosimilars by dermatologists, endocrinologists, gastroenterologists, haematologists, nephrologists, oncologists and rheumatologists<br><br>Web-survey with approx. 30 multiple-choice questions for 210 physicians (30 from each of the country) who were members of panels of physicians (approximately 250-600 physicians per country) who agreed earlier to participate in such survey studies, in 2015 | N/A                                                                                                                                                                                                                                                        | N/A                                                                                                                                                                                                  | Frequently used information sources: 63% professional guidelines, 55% SmPCs, 51% peer reviewed journals, 42% national or hospital formularies<br><br>The physicians preferred modified SmPC (modified for the purpose of the study) where additional information in the biosimilar label had been added, specifically: 1) clarifying which product (the biosimilar or the reference product) generated which clinical data, 2) inclusion of additional statements indicating that the product is a biosimilar, and 3) that similarity has been evaluated in preclinical and clinical studies. | N/A                                                                                                                                                                                                                                                                                                                                                                                                                                                                                                                                                                                                                                                                                                                                                    | N/A                                                                                                                                                                                                                                                                                                                                                                                                                                                                                                                                                                                                                                                                                 | N/A                                                                                                                                                                                                                                                                                              | N/A                                                                                                                                             |
| Hemmington et al. 2017 <sup>36</sup> (New Zealand)                                       | Perceptions and attitudes towards efficacy, safety and manufacturing of biosimilars, factors associated with positive attitudes, indication extrapolation and switching, and circumstances in which physicians would be reluctant to prescribe biosimilars                                                                                                                                                                                                                                                                                                                                  | 76% reported being familiar and having basic understanding and 13% very familiar and complete understanding of biosimilars, 9% had heard of biosimilars,                                                                                                   | N/A                                                                                                                                                                                                  | N/A                                                                                                                                                                                                                                                                                                                                                                                                                                                                                                                                                                                           | 70% very or somewhat confident of the efficacy of biosimilars<br><br>Less than 20% had negative views<br><br>Situations when biosimilars were not prescribed: 32% lack of clinical data, 17% evidence of adverse effects or lack of efficacy, 15% patients do well with current treatment and 6% patients have complex medical history                                                                                                                                                                                                                                                                                                                                                                                                                 | 71% would prescribe biosimilars for all or some clinical conditions meeting the relevant criteria, 10% would do this for only few or no clinical situations                                                                                                                                                                                                                                                                                                                                                                                                                                                                                                                         | 51% confident and 28% not very confident or not at all confident to switch patients                                                                                                                                                                                                              | N/A                                                                                                                                             |

|                                                                                              |                                                                                                                                                                                                                                                                                                                                                                                                                                    |                                                                                                                                                                                                                                                                                                                      |                                                                                                                                                                                                                                                                                   |                                                                                                                                                                                                                                                           |                                                                                                                                                                                                                                                                                                                                                                                                                                                                                                                                                                                                                                                                                                                                                                                                                                                                                                                                                                                                                                                                                                              |                                                                                                                                                                                                               |                                                                                                                                                           |                                                                                                                                                                                                                                                                                                                                                                                                                                                                      |
|----------------------------------------------------------------------------------------------|------------------------------------------------------------------------------------------------------------------------------------------------------------------------------------------------------------------------------------------------------------------------------------------------------------------------------------------------------------------------------------------------------------------------------------|----------------------------------------------------------------------------------------------------------------------------------------------------------------------------------------------------------------------------------------------------------------------------------------------------------------------|-----------------------------------------------------------------------------------------------------------------------------------------------------------------------------------------------------------------------------------------------------------------------------------|-----------------------------------------------------------------------------------------------------------------------------------------------------------------------------------------------------------------------------------------------------------|--------------------------------------------------------------------------------------------------------------------------------------------------------------------------------------------------------------------------------------------------------------------------------------------------------------------------------------------------------------------------------------------------------------------------------------------------------------------------------------------------------------------------------------------------------------------------------------------------------------------------------------------------------------------------------------------------------------------------------------------------------------------------------------------------------------------------------------------------------------------------------------------------------------------------------------------------------------------------------------------------------------------------------------------------------------------------------------------------------------|---------------------------------------------------------------------------------------------------------------------------------------------------------------------------------------------------------------|-----------------------------------------------------------------------------------------------------------------------------------------------------------|----------------------------------------------------------------------------------------------------------------------------------------------------------------------------------------------------------------------------------------------------------------------------------------------------------------------------------------------------------------------------------------------------------------------------------------------------------------------|
|                                                                                              | E-mail survey for 327 physicians in medical specialist society (n = 110)                                                                                                                                                                                                                                                                                                                                                           | but could not define them, and 2% had never heard of biosimilars                                                                                                                                                                                                                                                     |                                                                                                                                                                                                                                                                                   |                                                                                                                                                                                                                                                           | 47% very confident or somewhat confident, 32% not confident and the remainder undecided in indication extrapolation                                                                                                                                                                                                                                                                                                                                                                                                                                                                                                                                                                                                                                                                                                                                                                                                                                                                                                                                                                                          |                                                                                                                                                                                                               |                                                                                                                                                           |                                                                                                                                                                                                                                                                                                                                                                                                                                                                      |
| O'Callaghan et al. 2017 <sup>10</sup> (Ireland)                                              | Medical specialists', general practitioners' and community pharmacists awareness of and attitudes to biosimilars<br><br>E-mail-survey of 14-20 questions for 2917 physicians in national professional societies in 2016 (n = 253 analysed answers from general practitioners and n = 102 from medical specialists). Other stakeholders apart from physicians are not addressed in this review                                      | 44% of medical specialists and 5% of general practitioners very familiar with biosimilars, 41% and 35% familiar, and 6% and 25% had never heard the term "biosimilar"                                                                                                                                                | 25% of medical specialists and 18% of general practitioners considered biosimilars the same as generic medicines<br><br>31% of medical specialists incorrectly agreed that biological medicines sharing the same international non-proprietary name were "structurally identical" | Medical specialists (n = 101, not all answered this question): 72% guidelines from professional societies, 68% published literature and 63% educational events<br><br>GPs (n = 247, not all answered this question): 58% national or hospital formularies | 59% of those aware of biosimilars in their therapeutic area (n = 73) prescribed biosimilars, while 40% didn't<br><br>Concerns: 81% efficacy in extrapolated indications, 81% immunogenicity, 79% efficacy, 78% safety, 73% quality and 62% traceability                                                                                                                                                                                                                                                                                                                                                                                                                                                                                                                                                                                                                                                                                                                                                                                                                                                      | 67% of medical specialists that prescribed biosimilars (n = 43) would most likely prescribe a biosimilar for treatment initiation                                                                             | 28% of medical specialists that prescribed biosimilars (n = 43) would be likely to switch from originator to biosimilar                                   | <5% of medical specialists would consider pharmacist-led substitution appropriate<br><br>49% consider decisions should be taken by the prescriber on treatment initiation and 61% during treatment course. 43% consider decisions should be agreed with clinician in advance on treatment initiation and 35% during treatment course<br><br>84% think notifications for physician very important or critical in treatment initiation and 90% during treatment course |
| O Dolinar & Reilly 2014 <sup>26</sup> (France, Germany, Italy, Spain and the United Kingdom) | Nephrologists', rheumatologists', dermatologists', neurologists', endocrinologists' and oncologists' attitudes on biosimilar naming, substitution, and knowledge, sources of information and need for further education on biosimilars<br><br>Web-based 15-minutes short survey for 4,324 global physician market research panel of at the last quarter of 2013. 470 prescribers (20% of each five countries) completed the survey | 46% responded having basic understanding, 43% complete understanding, 11% could not define biosimilars and 1% had never heard of biosimilars<br><br>53% incorrectly thought biosimilar and originator were structurally identical and 37% incorrectly believed biosimilars are clinically tested for all indications | N/A                                                                                                                                                                                                                                                                               | 47% conferences and seminars, 35% self-study, 11% studies sponsored by biosimilar companies and 6% equally studies sponsored by innovator companies, clinical trial participation and other routes                                                        | 48% said it was very important, 24% critically important, 23% somewhat important, 4% slightly important and 1% not important to have a sole authority to select the medicine                                                                                                                                                                                                                                                                                                                                                                                                                                                                                                                                                                                                                                                                                                                                                                                                                                                                                                                                 | 47% considered that products with the same non-proprietary name could be safely given to a patient with same results, 40% didn't think that way                                                               | 45% think patients can't be switched between the products with same non-proprietary names, 39% believed patients could be switched safely and effectively | 62% not acceptable, 35% acceptable and 3% totally acceptable on pharmacist-led substitution<br><br>47% very important, 30% critical, 6% slightly important and 1% not important to receive a notification if the pharmacist had dispensed other than prescribed biologic medicine during a repeated treatment                                                                                                                                                        |
| van Overbeeke et al. 2017 <sup>27</sup> (Belgium)                                            | Knowledge and perceptions of patients and physicians with regard to originators and biosimilars and differences in perceptions and the factors influencing their preferences<br><br>Web survey of multiple-choice and open-ended questions for all 232 Belgian rheumatologists in 2016 (n = 41 responded). Other stakeholders apart from physicians are not addressed in this review                                               | 95% considered biosimilars are similar, but not identical                                                                                                                                                                                                                                                            | 90% were able to share the most complete definition of a biosimilar                                                                                                                                                                                                               | N/A                                                                                                                                                                                                                                                       | 7% had prescribed biosimilars. 73% preferred the originator when the prices were equal and 38% when originator was more expensive. When prices were equal, none preferred biosimilar.<br><br>93% considered price, 63% safety, 61% quality and 61% efficacy as sources of differences between originators and biosimilars<br><br>33% considered biosimilars and originators interchangeable if biosimilarity is proven in the same indication and 38% in indications where the medicine works via the same biological mechanism. 28% considered that biosimilars and originators were never interchangeable<br><br>56% think extrapolation could only be performed if efficacy and safety is proven to be similar in one of the indications and if the medicine works via the same mechanism in the other indications. 39% stated the indications should never be extrapolated<br><br>Positive influencers: clinical trials with positive results and clinical data in the respective indication. Negative influencers: less studied than the originator and no clinical trials in the respective indication | 8% would not prescribe a biosimilar and 60% would only prescribe a biosimilar to biologic-naïve patients.                                                                                                     | N/A                                                                                                                                                       | N/A                                                                                                                                                                                                                                                                                                                                                                                                                                                                  |
| Reilly & Murby 2017 <sup>35</sup> (Australia)                                                | Opinions on the naming of biologicals and biosimilars, how the use of these medicines is recorded and their views on substitution of, familiarity with, knowledge of, attitudes to and beliefs in biosimilars<br><br>Web-based survey for prescribers recruited from a global, commercial database of health care professional in 2016 (n = 451, of which 160 completed the survey)                                                | 21% considered themselves very familiar and having complete understanding of biosimilars, 73% basic understanding and 6% could not define them                                                                                                                                                                       | 50% thought biosimilars go through the same regulatory process as original biologics<br><br>70% knew biosimilars could be approved for all or for some indications of the originator                                                                                              | 46% published literature, 28% colleagues, 27% information from Pharmaceutical Benefits Advisory Committee, 24% product information label, 19% information from Therapeutic Goods Administration, 18% sales representative, 13% hospital formulary         | N/A                                                                                                                                                                                                                                                                                                                                                                                                                                                                                                                                                                                                                                                                                                                                                                                                                                                                                                                                                                                                                                                                                                          | 16% would be comfortable prescribing a biosimilar that was approved for several indications based on clinical trials in only one indication, 11% would not feel comfortable and 73% had some concerns on this | N/A                                                                                                                                                       | 54% very and 36% critically important to have sole authority to decide of which biological was dispensed<br><br>Evidence required for pharmacist-led substitution: 53% clinical trial data of no safety of efficacy risks in switching, 53% clinical trial data of no safety of efficacy risks                                                                                                                                                                       |

|                                              |                                                                                                                                                                                                                                                                                                                                                                                                                                                                                                                                                                                                                                                                                                                                                                                                                                                                          |     |     |                                     |                                                                                                                                                                                                                                                                                                                                                                                                                                                                                                                   |                                                                             |     |                                                                                                                  |
|----------------------------------------------|--------------------------------------------------------------------------------------------------------------------------------------------------------------------------------------------------------------------------------------------------------------------------------------------------------------------------------------------------------------------------------------------------------------------------------------------------------------------------------------------------------------------------------------------------------------------------------------------------------------------------------------------------------------------------------------------------------------------------------------------------------------------------------------------------------------------------------------------------------------------------|-----|-----|-------------------------------------|-------------------------------------------------------------------------------------------------------------------------------------------------------------------------------------------------------------------------------------------------------------------------------------------------------------------------------------------------------------------------------------------------------------------------------------------------------------------------------------------------------------------|-----------------------------------------------------------------------------|-----|------------------------------------------------------------------------------------------------------------------|
|                                              |                                                                                                                                                                                                                                                                                                                                                                                                                                                                                                                                                                                                                                                                                                                                                                                                                                                                          |     |     | 43% never used published literature |                                                                                                                                                                                                                                                                                                                                                                                                                                                                                                                   |                                                                             |     | after multiple switches, 27% in-market experience, 24% observational data and 6% no evidence would be sufficient |
| Sullivan et al. 2017 <sup>28</sup> (Germany) | <p>Motivators of prescribing biosimilars, preferences matching actual prescribing behaviour and patient acceptance, satisfaction and concerns on biosimilars and how these relate to the treatment with originators or biosimilars</p> <p>Real world, cross-sectional study (in which physicians filled a survey form and reported their prescribing, and recruited patients that also filled a questionnaire form to provide information on how reported prescribing was occurred in practice) in 2015-2016 (n = 25). Other stakeholders apart from physicians are not addressed in this review</p> <p>Based on their response, 11 physicians were assigned to investigative (primarily concerned with symptom improvement and disease modification), 7 to conservative (primarily concerned with safety) and 7 to other (influenced primarily by other factors)</p>    | N/A | N/A | N/A                                 | <p>Biosimilars account for 12-13% of all biologic therapies the respondents prescribe</p> <p>Reasons to prescribe: desire to get experience with the new product (89% of investigative, 100% of conservative and 57% of other), being convinced of equivalent efficacy compared to originators (44%, 67% and 43%), lower cost (44%, 63% and 71%), believing that is economic prescribing (44%, 83% and 57%) and believing that using biosimilars makes savings which can be used elsewhere (22%, 67% and 29%)</p> | 88% would prefer to prescribe originator to biosimilar as 1st line therapy  | N/A | N/A                                                                                                              |
| Waller et al. 2017 <sup>29</sup> (Germany)   | <p>Motivators of prescribing biosimilars, preferences matching actual prescribing behaviour, and patient acceptance, satisfaction and concerns on biosimilars and how these relate to the treatment with originators or biosimilars</p> <p>Real world, cross-sectional study (in which physicians filled a survey form and reported their prescribing, and recruited patients that also filled a questionnaire form to provide information on how reported prescribing was occurred in practice) in 2015-2016 (n = 50). Other stakeholders apart from physicians are not addressed in this review</p> <p>Based on their response, 23 physicians were assigned to investigative (primarily concerned with symptom improvement and disease modification), 17 to conservative (primarily concerned with safety) and 10 to other (influenced primarily by other factors)</p> | N/A | N/A | N/A                                 | <p>Biosimilars constitute less than 10% of the biologic therapies the respondents prescribed</p> <p>Reasons to prescribe: desire to get experience with the new product (86% of investigative, 65% of conservative and 50% of other), being convinced of equivalent efficacy compared to originators (64%, 65% and 50%) and lower costs (64%, 71% and 88%)</p>                                                                                                                                                    | >95% would prefer to prescribe originator to biosimilar as 1st line therapy | N/A | N/A                                                                                                              |

### Quality assessment

Of the 23 included studies, seven<sup>10,18,20–21,23,27,34</sup> were evaluated as high, six<sup>19,22,28–31</sup> as moderate and nine<sup>17, 24–26,32–33,35,37–38</sup> as low in quality based on the criteria used in this review (**Table 3**). Publications evaluated as high in quality often included well-described and logically presented methods and results sections together with a critical discussion section, which those evaluated as moderate or low quality typically lacked. In general, the quality assessment revealed that there is a lack of valid instruments and studies utilizing qualitative research methods.

### Self-rated and measured knowledge on biosimilars and sources of information (n = 18)

There was wide variation in physicians' self-rated knowledge of biosimilars (**Table 2**). Most physicians reported having at least a basic understanding of the topic: 5–44% reported that they were very familiar and 49–76% that they were familiar with biosimilars<sup>10,24,26–27,31,34,35–36</sup>. However, 2–25% of the physicians reported that they did not know what biosimilars are. Physicians with more years of practice and those with specialisation consider themselves more familiar with biosimilars in comparison to less experienced colleagues and general practitioners<sup>10,22,34</sup>.

Although according to their self-rating the physicians generally were familiar with biosimilars, their actual measured knowledge of the topic appeared to be weaker (**Table 2**). From 18% to 66% of the physicians incorrectly described biosimilars as generic medicines, whereas 31–72% thought they are structurally identical to originator medicines<sup>10,22–23,25,32,34–35,37–38</sup>. However, in three studies, 76–100% were able to state the complete definition of a biosimilar correctly<sup>18–19,27</sup>.

The physicians used several sources of information about biologic medicines, such as scientific publications (25–84%), self-study (35–84%), pharmaceutical companies (32–76%), guidelines from professional societies (26–75%), educational events and conferences (17–71%), other published literature (46–68%), physician colleagues (28–54%), safety registries (52%), and pharmacist colleagues (19%)<sup>10,17,19,22,24–26,30–32,35,37</sup> (**Table 2**). One study found that information sources may vary according to the physicians' educational background, as the most common information source for medical specialists were the guidelines from professional societies, whereas for general practitioners they were national or hospital formularies<sup>10</sup>.

Table 3. Summary of the quality evaluation of the 23 included studies of this systematic review.

| Reference                               | Main strengths                                                                                                                       | Main limitations                                                                                                                                                                                                                                                             | Quality according to the quality assessment protocol |
|-----------------------------------------|--------------------------------------------------------------------------------------------------------------------------------------|------------------------------------------------------------------------------------------------------------------------------------------------------------------------------------------------------------------------------------------------------------------------------|------------------------------------------------------|
| Aladul et al. 2019 <sup>18</sup>        | Results logically and clearly displayed                                                                                              | Details of the questionnaire form were not available, discussion on methodology partly lacking                                                                                                                                                                               | High                                                 |
| Baji et al. 2016a <sup>20</sup>         | Well-described and logically presented methodology, results and discussion                                                           | Ethical discussion lacking                                                                                                                                                                                                                                                   | High                                                 |
| Baji et al. 2016b <sup>21</sup>         | Well-described and logically presented methodology, results and discussion                                                           | Critical and ethical discussion partly lacking                                                                                                                                                                                                                               | High                                                 |
| Chapman et al. 2018 <sup>23</sup>       | Mainly well-described and logically presented methodology, results and discussion                                                    | More in-depth information could have been collected by a qualitative study                                                                                                                                                                                                   | High                                                 |
| Grabowski et al. 2015 <sup>34</sup>     | Well-described and logically presented methodology, results and discussion                                                           | More in-depth information could have been collected by a qualitative study                                                                                                                                                                                                   | High*                                                |
| Hemmington et al. 2017 <sup>36</sup>    | Well-described and logically presented methodology, results and discussion                                                           | Details of the questionnaire form were not available, more in-depth information could have been collected by a qualitative study                                                                                                                                             | High                                                 |
| O'Callaghan et al. 2017 <sup>10</sup>   | Well-described and logically presented methodology, results and discussion                                                           | More in-depth information could have been collected by a qualitative study                                                                                                                                                                                                   | High                                                 |
| van Overbeeke et al. 2017 <sup>27</sup> | Well-described and logically presented methodology, results and discussion                                                           | More in-depth information could have been collected by a qualitative study                                                                                                                                                                                                   | High                                                 |
| Aladul et al. 2018 <sup>19</sup>        | Semi-structured interviews provide a more in-depth view on the perceptions of healthcare professional in comparison to short surveys | Exact numbers of respondents which certain opinion (n) not always reported, low number of representatives per each professional group                                                                                                                                        | Moderate*                                            |
| Barsell et al. 2017 <sup>31</sup>       | Well-presented results and discussion                                                                                                | Details of the questionnaire form were not available, description of methodology lacking, e.g. dropout not described, ethical discussion lacking                                                                                                                             | Moderate                                             |
| Beck et al. 2016 <sup>22</sup>          | Well-presented results and discussion                                                                                                | Details of the questionnaire form were not available, validity of the instrument unclear, as more in-depth information could have been collected by a qualitative study, dropout not described accurately                                                                    | Moderate*                                            |
| Hallersten et al. 2016 <sup>30</sup>    | Results clearly presented                                                                                                            | Details of the panel of physicians in different European countries where the respondents were recruited were not shown. Critical discussion on the method partly lacking.                                                                                                    | Moderate                                             |
| Sullivan et al. 2017 <sup>28</sup>      | Results clearly presented                                                                                                            | Dropout not described accurately, some inconsistencies in the presentation of methodology and discussion                                                                                                                                                                     | Moderate*                                            |
| Waller et al. 2017 <sup>29</sup>        | Well-presented results and discussion                                                                                                | Some inconsistencies in the presentation of methodology, e.g. sample selection and dropout                                                                                                                                                                                   | Moderate*                                            |
| Akhmetov et al. 2015 <sup>17</sup>      | Explicit aims                                                                                                                        | Clear presentation of results lacking, critical and ethical discussion lacking                                                                                                                                                                                               | Low                                                  |
| Cohen et al. 2016 <sup>32</sup>         | Mainly well-presented results and discussion                                                                                         | Details of the questionnaire form were not available, description of methodology lacking, ethical discussion lacking                                                                                                                                                         | Low                                                  |
| Danese et al. 2016 <sup>24</sup>        | Results clearly presented                                                                                                            | Details of the questionnaire form were not available, critical and ethical discussion partly lacking, description of methodology partly lacking                                                                                                                              | Low                                                  |
| Danese et al. 2014 <sup>25</sup>        | Results clearly presented                                                                                                            | Statistical analyses lacking, critical and ethical discussion lacking, description of methodology partly lacking, for example the number of invited members not mentioned                                                                                                    | Low                                                  |
| Farhat et al. 2016 <sup>38</sup>        | Mainly logically presented methodology                                                                                               | Aim is not explicitly presented, number of physicians who responded not reported, results presented in table format only, critical discussion lacking                                                                                                                        | Low*                                                 |
| Felix et al. 2014 <sup>33</sup>         | Explicit aims                                                                                                                        | Strategic sample selection, details of the questionnaire form were not available, exact numbers of respondents which certain opinion (n) not always reported, description of used statistical methods and data analysis lacking, inconsistency in the description of results | Low                                                  |
| Gewanter & Reilly 2014 <sup>37</sup>    | Explicit aims                                                                                                                        | Respondents from market research panel resulting that respondents work in disciplines in which don't necessarily involve biosimilars, such as psychiatry, description of used statistical methods and data analysis lacking, critical and ethical discussion lacking         | Low                                                  |
| O'Dolinar & Reilly 2014 <sup>26</sup>   | Explicit aims                                                                                                                        | Intentional sample selection, clear presentation of results lacking, critical and ethical discussion lacking                                                                                                                                                                 | Low                                                  |
| Reilly & Murby 2017 <sup>35</sup>       | Explicit aims                                                                                                                        | Description of data collection partly lacking, description of used statistical methods and data analysis lacking                                                                                                                                                             | Low                                                  |

\* Differences in opinions of which quality grade each publication was given, set in consensus

### **Attitudes towards and experienced advantages and disadvantages of biosimilars (n = 21)**

The physicians' reported attitudes towards biosimilars seem contradictory<sup>10, 20–25,27–29,31–34,36–38</sup> (**Table 2**). Some (6–38%) physicians consider biosimilars and originator products interchangeable, while others (28%) never think so<sup>25, 27</sup>. Some studies show that 65–67% of physicians have concerns regarding biosimilars<sup>20–21</sup>, while others report that 54–94% of physicians feel somewhat or very confident prescribing biosimilars<sup>10, 22,24,34,36</sup>. Regardless, a positive attitude towards biosimilars does not automatically translate into prescribing, as physicians seem to prefer originator products to biosimilars<sup>20,27,34</sup>. Some studies indicate that there might be differences in attitudes towards biosimilars between specialties: gastroenterologists seem to be frequent prescribers of biosimilars, while dermatologists and rheumatologists seem less enthusiastic<sup>19,23,32</sup>.

The main experienced advantages of biosimilars are cost savings<sup>18,22–25,31</sup>, lower price in comparison to the originator biologic medicine<sup>31,38</sup> and the possibility to get experience with the new product<sup>28–29</sup>(**Table 2**). Additionally, single studies reported that robust pharmacovigilance studies<sup>18</sup>, easier access to treatment for patients<sup>31</sup>, and approval of the European Medicines Agency or the Food and Drug Administration<sup>38</sup> were motivators for prescribing biosimilars. The most commonly reported disadvantages were distrust in safety<sup>10,18,22,31,33</sup>, efficacy<sup>10,18,22,31,33</sup>, immunogenicity<sup>10,25,31</sup> and indication extrapolation of biosimilars<sup>10,34</sup> or the lack of clinical data on biosimilars<sup>24,26</sup>. Single studies also suggested that the quality<sup>10</sup>, traceability<sup>10</sup> or tolerability<sup>22</sup> of biosimilars and patients' concerns towards biosimilars<sup>22</sup> were disadvantages.

### **Initiation of biosimilars and switches between original biologic medicines and biosimilars (n = 21)**

The physicians (39–89%) seemed more willing to prescribe a biosimilar for biologic-naïve patients rather than for patients already being treated with biologic medicines<sup>10,20,23,25,27–29,31,33–38</sup> (**Table 2**). In discrete choice experiment studies, for example, 61–84% of gastroenterologists chose biosimilars in at least one of the choice sets for biological-naïve patients<sup>20–21</sup>. However, there are also other factors affecting the medicine selection, such as the cost of the medicines. One article reported that if cost were not an issue, only 11% of physicians would choose a biosimilar for treatment initiation<sup>34</sup>. Additionally, some studies suggest that some personal characteristics may influence the uptake of biosimilars by individual physicians: men, senior consultants and those treating more patients<sup>21</sup>, along with those more familiar with brand name medicines and uncertain of the long-term safety of biosimilars<sup>34</sup> were often unlikely to choose a biosimilar as initial therapy. Within medical specialties, gastroenterologists (95% with no concerns) appear to be the most confident to use biosimilars in treatment initiations, followed by rheumatologists (92%), dermatologists (79%) and diabetologists (75%)<sup>23</sup>.

The physicians did not seem willing to switch from an originator biologic medicine to a biosimilar<sup>10,20–25,32–34,36–37</sup> (**Table 2**). The proportion of physicians willing to switch from an originator to a biosimilar was 51 % or less, except in a single study in which the percentage was 91%<sup>10, 22,24–25,32,34,36</sup>. Similarly, when it comes to treatment initiation, the medical specialty of the physicians affected their willingness to switch biologic medicines<sup>23</sup>. Gastroenterologists (95% with no concerns) seemed the most confident concerning switching, followed by dermatologists (78%), diabetologists (69%) and, notably, rheumatologists (53%).

### **Pharmacist-led substitution of biologic medicines (n = 9)**

Most physicians (64–95%) were concerned about or disagreed with pharmacist-led substitution of biologic medicines<sup>10, 19,22,24–26,31,34–35</sup> (**Table 2**). The studies suggest that having full autonomy in medicine selection and being fully aware of which medicines their patients receive was often crucial for physicians<sup>10,26,31,35</sup>. However, according to a single study, 88% of the physicians believed that pharmacist-led substitution without consulting physicians will be allowed in the future<sup>31</sup>.



#### 4 DISCUSSION

In this systematic review, physicians' knowledge of biosimilars varied widely. In general, their measured knowledge was weaker than their self-assessed knowledge. They used multiple sources of information about biologic medicines, most commonly scientific publications, pharmaceutical companies and professional societies. Similarly, their perceptions of biosimilars and the uptake of these medicines also varied. They seemed to prefer originator products to biosimilars, and prescribe biosimilars mainly for biologic-naïve patients. They consider cost savings and the lower price compared with the originator biologic medicines to be the main advantages of biosimilars, while their doubts wererelated to the safety, efficacy and immunogenicity of biosimilars. Most of the physicians had negative perceptions of pharmacist-led substitution of biologic medicines. The results in this review are in line with an earlier systematic review of healthcare providers' perceptions of biosimilars<sup>12</sup>.

##### Physicians' knowledge of biosimilars

This study found that physicians' knowledge of biosimilars in many cases was inadequate, and this may contribute to the low prescribing and uptake of biosimilars<sup>10,12,32</sup>. Although this issue has been widely recognised, there is limited evidence of the effectiveness of education interventions on prescribing<sup>40</sup>. In contrast, academic detailing has proven to be effective in steering prescribing<sup>41-42</sup>. This is a method in which a trained educator meets with a healthcare professional and shares the latest evidence-based information on the topic concerned<sup>43</sup>. Besides its effectiveness in steering prescribing patterns, academic detailing has been proven to improve the cost-effectiveness of prescribing and reduce medical costs<sup>44-45</sup>. It is vital that in the near future physicians and other healthcare professionals are provided targeted, evidence-based information on biosimilars to support their uptake and to gain the full cost-saving potential of these medicines<sup>46-47</sup>. The educational activities of medical societies is also vital in the distribution of appropriate biosimilar information<sup>11</sup>.

##### Physicians' attitudes towards biosimilars and means to enhance the uptake

According to this study, physicians' attitudes towards biosimilars were contradictory, and the prescribing of biosimilars is more often directed to biologic-naïve patients despite the convincing evidence that supports switching<sup>48</sup>. Prescribing decisions can either be made by individual physicians orsteered by binding policies that vary across countries. Furthermore, besides actual steering policies, there are general differences across health systems in prescribing, dispensing, pricing and reimbursement of biologic medicines that may have effects on the uptake.<sup>10-11</sup> In Denmark and Norway, for example, hospital, regional or national tendering is in use, resulting in significant savings in the purchase of biologic medicines<sup>11, 49-50</sup>. Some countries have implemented incentives for healthcare professionals<sup>11</sup>. Prescription quotas defining the ratio of biosimilars of all prescribed biologic medicines are in use in Germany and Sweden<sup>51</sup>, while profit-sharing agreements making it possible to use the savings from biosimilar uptake for the benefit of the clinic or the organisation are used in Sweden and the United Kingdom<sup>52-53</sup>. Pharmacist-led substitution of biologic medicines can also be seen as a potential means to enhance the uptake of biosimilars<sup>11, 31</sup>. This is legislatively possible in France and in the United States, and for some biological medicines also in Australia<sup>54-56</sup>. Furthermore, the implementation of pharmacist-led substitution is currently ongoing in some European countries<sup>46,57</sup>. All these initiatives highlight that the weak uptake of biosimilars has been acknowledged globally, and there is a need to discover sustainable means to enhance and stabilize their uptake<sup>11</sup>. What complicates the issue is that, for example in Europe, even though the biosimilarity between biologic medicines is stated by the European Medicines Agency, decisions on the interchangeability and substitution are made at the national level. In order to support the uptake of biosimilars, educational measures for both healthcare professionals and patients are needed, although the role of national recommendations, policies and steering in the switching and substitution of biologic medicines should not be understated<sup>31,46-47</sup>.

### Strengths and limitations

The main strengths of our review are that the literature search was conducted with the help of an experienced information specialist, and that the step-by-step review and inclusion of publications as well as the quality evaluation of studies was conducted independently by two researchers in order to avoid bias<sup>58</sup>. Compared to the previous systematic review<sup>12</sup>, this review included twelve more original publications due to a wider literature search focus. Furthermore, the current study excluded conference papers and Letters to Editors because for the purpose of the quality assessment full information about the methodology of the included studies was needed. One major limitation of this review is that the study-by-study data extraction was done by only one researcher. Furthermore, theses or reports by authorities that could have included research results were excluded from this study. In addition, none of the available protocols for quality assessment covered different types of study settings, so the protocol used in this study was compiled from four separate protocols. Moreover, the included studies were conducted in different countries with unique regulatory laws and policies that undoubtedly affect the uptake and prescribing of biosimilars at the national level. However, it is vital to compile studies from different countries with different systems and policies in order to form a comprehensive view of the current situation concerning the uptake of biosimilars. Another notable point is that the data in the studies included in this review were mainly collected in 2017 or earlier. The topic is very timely and perceptions of the uptake of biosimilars may change in light of new research information, interventions and experience in using these medicines. Thus, there is a need to continue examining physicians' perceptions, both in general and with different disciplines, particularly with qualitative research methods. Further studies are needed to explore the differences between disciplines in the attitudes towards and prescribing of biosimilars, as the reasons behind these differences could not be explored in detail based on the studies included in this review.

### Practical implications

This systematic review provides up-to-date knowledge about physicians' perceptions of the uptake of biosimilars, and highlights the need for further education and steering on this issue. The knowledge provided by the review may be utilised in visioning future means to enhance the uptake of biosimilars that could include information sharing and educational interventions by means of, e.g., academic detailing. The uptake of biosimilars may also be enhanced by implementing national policies or steering procedures that support the uptake, by means of pharmacist-led substitution of biologic medicines, for example.

## 5 CONCLUSIONS

This systematic review shows that physicians' knowledge of and attitudes towards biosimilars vary. Although physicians have positive attitudes towards biosimilars, prescribing is limited, especially for patients already being treated with biologic medicines. Perceptions of the pharmacist-led substitution of biologic medicines are often negative. Education and national recommendations and policies for switching and substitution of biologic medicines are needed to support the uptake of biosimilars.

### FUNDING

This study is a part of a larger research project funded by the Social Insurance Institution of Finland (Kela), grant (31/26/2017). The funder had no role in the planning or conduction of this review.

### COMPETING INTERESTS

Authors declare no competing interests.

### AUTHOR'S CONTRIBUTIONS

KS, MM, JJ and KHA contributed to the conception or study design. KS and MM acted as principal investigators in the search and evaluation of the literature and in the quality assessment. KS drafted the manuscript. All authors participated in critical revision of the manuscript and approved the final version.

### PATIENT CONSENT

Not required.

### ETHICAL CONSENT

Not required.

### PATIENT AND PUBLIC INVOLVEMENT

This research was done without patient involvement. Patients were not invited to comment on the study design and were not consulted to develop patient relevant outcomes or interpret the results. Patients were not invited to contribute to the writing or editing of this document for readability or accuracy.

### DATA SHARING STATEMENT

All data relevant to the study are included in the article or uploaded as supplementary information.

### REFERENCES

- 1 European Commission. Directive 2001/83/EC of the European Parliament and of the Council of 6 November 2001 on the Community code relating to medicinal products for human use (2001).
- 2 United States Food and Drug Administration. Biosimilar and Interchangeable Products. Updated 2018a. Accessed 27 Jun 2019: [www.fda.gov/Drugs/DevelopmentApprovalProcess/HowDrugsareDevelopedandApproved/ApprovalApplications/TherapeuticBiologicApplications/Biosimilars/ucm580419.htm](http://www.fda.gov/Drugs/DevelopmentApprovalProcess/HowDrugsareDevelopedandApproved/ApprovalApplications/TherapeuticBiologicApplications/Biosimilars/ucm580419.htm)
- 3 McCamish M, Woollett G. Worldwide experience with biosimilar development. *MAbs* 2011;3(2):209–17.
- 4 European Medicines Agency. Biosimilar medicines: Overview. Updated 2018a. Accessed 27 Jun 2019: [www.ema.europa.eu/en/human-regulatory/overview/biosimilar-medicines](http://www.ema.europa.eu/en/human-regulatory/overview/biosimilar-medicines)
- 5 QuintilesIMS. 2017 IMS Biosimilar report - The Impact of Biosimilar Competition in Europe. Updated 2017. Accessed 27 Jun 2019: <http://ec.europa.eu/DocsRoom/documents/23102>
- 6 European Medicines Agency. Medicines search. Updated 2018b. Accessed 27 Jun 2019: [www.ema.europa.eu/en/medicines/field\\_ema\\_web\\_categories%253Aname\\_field/Human/ema\\_group\\_types/ema\\_medicine/field\\_ema\\_med\\_status/authorised-36/ema\\_medicine\\_types/field\\_ema\\_med\\_biosimilar/field\\_ema\\_web\\_categories%253Aname\\_field/Human/search\\_api\\_aggregation\\_ema\\_medicine\\_types/field\\_ema\\_med\\_biosimilar/ema\\_group\\_types/ema\\_medicine/field\\_ema\\_med\\_status/authorised-36?sort=ema\\_medicine\\_title&order=asc](http://www.ema.europa.eu/en/medicines/field_ema_web_categories%253Aname_field/Human/ema_group_types/ema_medicine/field_ema_med_status/authorised-36/ema_medicine_types/field_ema_med_biosimilar/field_ema_web_categories%253Aname_field/Human/search_api_aggregation_ema_medicine_types/field_ema_med_biosimilar/ema_group_types/ema_medicine/field_ema_med_status/authorised-36?sort=ema_medicine_title&order=asc)
- 7 United States Food and Drug Administration. Biosimilar Product Information. Updated 2018b. Accessed 27 Jun 2019: [www.fda.gov/drugs/developmentapprovalprocess/howdrugsaredevelopedandapproved/approvalapplications/therapeuticbiologicapplications/biosimilars/ucm580432.htm](http://www.fda.gov/drugs/developmentapprovalprocess/howdrugsaredevelopedandapproved/approvalapplications/therapeuticbiologicapplications/biosimilars/ucm580432.htm)
- 8 Blackstone A, Fuhr JP. The Economics of Biosimilars. *Am Health Drug Benefits* 2013;6(8):469–78.
- 9 European Commission. What you Need to Know about Biosimilar Medicinal Products. A Consensus Information Document. Updated 2013. Accessed 27 Jun 2019: <http://ec.europa.eu/DocsRoom/documents/8242/attachments/1/translations>

17

- 1  
2  
3 10 O'Callaghan J, Bermingham M, Leonard M, et al. Assessing awareness and attitudes of healthcare  
4 professionals on the use of biosimilar medicines: A survey of physicians and pharmacists in Ireland. *Regul*  
5 *Toxicol Pharmacol* 2017;88:252–61.  
6
- 7 11 O'Callaghan J, Barry SP, Bermingham M, et al. Regulation of biosimilar medicines and current perspectives of  
8 interchangeability and policy. *Eur J Clin Pharmacol* 2019;75(1):1–11.  
9
- 10 12 Leonard E, Wascovich M, Oskuei S, et al. Factors Affecting Health Care Provider Knowledge and Acceptance  
11 of Biosimilar Medicines: A Systematic Review. *J Manag Care Spec Pharm.* 2019;25(1):102–12.  
12
- 13 13 Åkesson KM, Saveman B-I, Nilsson G. Health care consumers' experiences of information communication  
14 technology – A summary of literature. *Int J Med Inform* 2007;76:633–45.  
15
- 16 14 Tong A, Sainsbury P, Graig J. Consolidated criteria for reporting qualitative research (COREQ): a 32-item  
17 checklist for interviews and focus groups. *Int J Qual Health Care* 2007;19(6):349–57.  
18
- 19 15 Joanna Briggs Institute. Reviewers' manual 2014. Updated 2014. Accessed 27 Jun 2019:  
20 <http://joannabriggs.org/assets/docs/sumari/reviewersmanual-2014.pdf>  
21
- 22 16 Swedish Agency for Health Technology Assessment and Assessment of Social Services. Evaluation and  
23 synthesis of studies using qualitative methods of analysis. Updated 2016. Accessed 27 Jun 2019:  
24 [www.sbu.se/globalassets/ebm/metodbok/sbuhandbook\\_qualitativemethodsofanalysis.pdf](http://www.sbu.se/globalassets/ebm/metodbok/sbuhandbook_qualitativemethodsofanalysis.pdf)  
25
- 26 17 Akhmetov I, Farista R, Thimmaraju PK. A Study to Assess the Awareness of the Biosimilars among Ukrainian  
27 Physicians. *J Bioanal Biomed* 2015;7(2):66–9.  
28
- 29 18 Aladul MI, Fitzpatrick RW, Chapman SR. Differences in UK healthcare professionals' knowledge, attitude and  
30 practice towards infliximab and insulin glargine biosimilars. *Int J Pharm Pract* 2019;27(2):214–7.  
31
- 32 19 Aladul MI, Fitzpatrick RW, Chapman SR. Healthcare professionals' perceptions and perspectives on biosimilar  
33 medicines and the barriers and facilitators to their prescribing in UK: a qualitative study. *BMJ Open*  
34 2018;8:e023603.  
35
- 36 20 Baji P, Gulácsi L, Golovics PA, et al. Perceived Risks Contra Benefits of Using Biosimilar Drugs in Ulcerative  
37 Colitis: Discrete Choice Experiment among Gastroenterologists. *Value Health Reg Issues* 2016a;10C:85–90.  
38
- 39 21 Baji P, Gulácsi L, Lovász BD, et al. Treatment preferences of originator versus biosimilar drugs in Crohn's  
40 disease; discrete choice experiment among gastroenterologists. *Scand J Gastroenterol* 2016b;51:22–7.  
41
- 42 22 Beck M, Michel B, Rybarzyck-Vigouret MC, et al. Rheumatologists' Perceptions of Biosimilar Medicines  
43 Prescription: Findings from a French Web-Based Survey. *BioDrugs* 2016;30:585–92.  
44
- 45 23 Chapman SR, Fitzpatrick RW, Aladul MI. Knowledge, attitude and practice of healthcare professionals  
46 towards infliximab and insulin glargine biosimilars: result of a UK web-based survey. *BMJ Open* 2017;7:e016730.  
47
- 48 24 Danese S, Fiorino G, Michetti P. Changes in Biosimilar Knowledge among European Crohn's Colitis  
49 Organization [ECCO] Members: An Updated Survey. *J Crohns Colitis* 2016;10(11):1362–5.  
50
- 51 25 Danese S, Fiorino G, Michetti P. Viewpoint: Knowledge and viewpoints on biosimilar monoclonal antibodies  
52 among members of the European Crohn's and Colitis Organization. *J Crohns Colitis* 2014;8:1548–50.  
53
- 54 26 O'Dolinar RO, Reilly MS. Biosimilars naming, label transparency and authority of choice - survey findings  
55 among European physicians. *GaBI J* 2014;3(2):58–62.  
56
- 57 27 van der Overbeeke E, DE Beleyr B, de Hoon J, et al. Perception of Originator Biologics and Biosimilars: A  
58 survey among Belgian rheumatoid arthritis patients and rheumatologists. *BioDrugs* 2017;31:447–59.  
59
- 60 28 Sullivan E, Piercy J, Waller J, et al. Assessing gastroenterologist and patient acceptance of biosimilars in  
ulcerative colitis and Crohn's disease across Germany. *PLoS One* 2017;14;12(4):e0175826.

- 1  
2  
3 29 Waller J, Sullivan E, Piercy J. Assessing physician and patient acceptance of infliximab biosimilars in  
4 rheumatoid arthritis, ankylosing spondyloarthritis and psoriatic arthritis across Germany. *Patient Prefer Adher*  
5 2017;11:519–30.  
6  
7 30 Hallersten A, Fürst W, Mezzasalma R. Physicians prefer greater detail in the biosimilar label (SmPC) - Results  
8 of a survey across seven European countries. *Regul Toxicol Pharmacol* 2016;77:275-81.  
9  
10 31 Barsell A, Rengifo-Pardo M, Ehrlich A. A Survey Assessment of US Dermatologists' Perception of Biosimilars.  
11 *J Drugs Dermatol* 2017;16(6):612–5.  
12  
13 32 Cohen H, Beydoun D, Chien D, et al. Awareness, Knowledge, and Perceptions of Biosimilars Among  
14 Specialty Physicians. *Adv Ther* 2016;33:2160–72.  
15  
16 33 Felix A, Gupta A, Choen JP, et al. Barriers to market uptake of biosimilars in the US. *GaBI J* 2014;3(3):108–  
17 15.  
18  
19 34 Grabowski D, Henderson B, Lam D, et al. Attitudes towards subsequent entry biologics/biosimilars: A survey  
20 of Canadian rheumatologists. *Clin Rheumatol* 2015;34:1427–33.  
21  
22 35 Reilly MS, Murby SP. A survey of Australian prescribers' views on the naming and substitution of biologicals.  
23 *GaBI J* 2017;8(3):107–13.  
24  
25 36 Hemmington A, Dalbeth N, Jarreett P, et al. Medical specialists' attitudes to prescribing biosimilars.  
26 *Pharmacoepidemiol Drug Saf* 2017;26:570–7.  
27  
28 37 Gewanter HL, Reilly MS. Prescribing practices for biosimilars: questionnaire survey findings from physicians in  
29 Argentina, Brazil, Colombia and Mexico. *GaBI J* 2015;4(4):161–6.  
30  
31 38 Farhat F, Othman A, el Karak F, et al. Review and results of a survey about biosimilars prescription and  
32 challenges in the Middle East and North Africa region. *Springer Plus* 2016;5(2113):1–9.  
33  
34 39 de Bekker-Grob EW, Ryan M, Gerard K. Discrete choice experiments in health economics: a review of the  
35 literature. *HealthEcon* 2012; 21:145–72.  
36  
37 40 Sipilä R, Helin-Salmivaara A, Korhonen MJ, et al. Change in antihypertensive drug prescribing after guideline  
38 implementation: a controlled before and after study. *BMC Fam Pract* 2011;12(87):1–12.  
39  
40 41 Solomon DH, Van Houten L, Glynn RJ, et al. Academic detailing to improve use of broad-spectrum  
41 antibiotics at an academic medical center. *Arch Intern Med* 2001;161(15):1897–902.  
42  
43 42 O'Brien MA, Rogers S, Jamtvedt G, et al. Educational outreach visits: effects on professional practice and  
44 health care outcomes. *Cochrane Database Syst Rev* 2007;17(4):CD000409  
45  
46 43 National Resource Center for Academic Detailing. Introductory Guide to Academic Detailing. Updated 2017.  
47 Accessed 16 Jul 2019: [www.narcad.org/uploads/5/7/9/5/57955981/introductory\\_guide\\_to\\_ad.pdf](http://www.narcad.org/uploads/5/7/9/5/57955981/introductory_guide_to_ad.pdf)  
48  
49 44 Simon SR, Rodriguez HP, Majumdar SR, et al. Economic analysis of a randomized trial of academic detailing  
50 interventions to improve use of antihypertensive medications. *J Clin Hypertens (Greenwich)* 2007;9(1):15–20.  
51  
52 45 Patel B, Afghan S. Effects of an educational outreach campaign (IMPACT) on depression management  
53 delivered to general practitioners in one primary care trust. *Ment Health Fam Med* 2009;6(3):155–62.  
54  
55 46 Moorkens E, Vulto AG, Huys I, et al. Policies for biosimilar uptake in Europe: An overview. *PLoS One*  
56 2017;12(12):e0190147.  
57  
58 47 Cook JW, McGrath MK, Dixon MD, et al. Academic oncology clinicians' understanding of biosimilars and  
59 information needed before prescribing. *Ther Adv Med Oncol* 2019;6(11):1758835918818335.  
60  
61 48 Cohen HP, Blauvelt A, Rifkin RM, et al. Switching Reference Medicines to Biosimilars: A Systematic Literature  
62 Review of Clinical Outcomes. *Drugs* 2018;78(4):463–78.

19

- 1  
2  
3 49 Mack A. Norway, biosimilars in different funding system. What works? *GaBI J* 2015;4(2):90–2.  
4  
5 50 Lunddahl B. Pharmacovigilance on biologicals and biosimilars: a Danish perspective. *GaBI J* 2016;5(3):123–4.  
6  
7 51 Rémuzat C, Kapuśniak A, Caban A, et al. Supply-side and demand-side policies for biosimilars: an overview  
8 in 10 European member states. *J Mark Access Health Policy* 2017;5(1):1307315.  
9  
10 52 Underhill C. Biosimilars and IBD: a switch programme using CT-P13. *Clin Pharm* 2016;8(9):266–70.  
11  
12 53 Flodmark C-E, Lilja K, Woehling H, et al. Switching from originator to biosimilar human growth hormone using  
13 dialogue teamwork: single-center experience from Sweden. *Biol Ther* 2013;3(1):35–43.  
14  
15 54 Thimmaraju PK, Rakshambikai R, Farista R, et al. Legislations on biosimilar interchangeability in the US and  
16 EU – developments far from visibility. Updated 2018. Accessed 16 Jul 2019: [www.gabionline.net/Sponsored-](http://www.gabionline.net/Sponsored-Articles/Legislations-on-biosimilar-interchangeability-in-the-US-and-EU-developments-far-from-visibility)  
17 [Articles/Legislations-on-biosimilar-interchangeability-in-the-US-and-EU-developments-far-from-visibility](http://www.gabionline.net/Sponsored-Articles/Legislations-on-biosimilar-interchangeability-in-the-US-and-EU-developments-far-from-visibility)  
18  
19 55 Cauchi R. State laws and legislation related to biologics medications and substitution of biosimilars. Updated  
20 2018. Accessed 16 Jul 2019: [www.ncsl.org/research/health/state-laws-and-legislation-related-to-biologic-](http://www.ncsl.org/research/health/state-laws-and-legislation-related-to-biologic-medications-and-substitution-of-biosimilars.aspx)  
21 [medications-and-substitution-of-biosimilars.aspx](http://www.ncsl.org/research/health/state-laws-and-legislation-related-to-biologic-medications-and-substitution-of-biosimilars.aspx)  
22  
23 56 Australian Government Department of Health. Biosimilar awareness initiative. Updated 2018. Accessed 16 Jul  
24 2019: [www.health.gov.au/internet/main/publishing.nsf/Content/biosimilar-awareness-initiative](http://www.health.gov.au/internet/main/publishing.nsf/Content/biosimilar-awareness-initiative)  
25  
26 57 Larkin H, Macdonald J, Lumsden R. Pharmacy-mediated substitution of biosimilars – a global survey  
27 benchmarking country substitution policies. *GaBI J* 2017;6(4):157–64.  
28  
29 58 Singh S. How to Conduct and Interpret Systematic Reviews and Meta-Analyses. *Clin Transl Gastroenterol*  
30 2017;8(5):e93.

## 31 **FIGURE LEGENDS**

32  
33  
34  
35 Figure 1. PRISMA flow chart explaining the study inclusion process.  
36  
37  
38  
39  
40  
41  
42  
43  
44  
45  
46  
47  
48  
49  
50  
51  
52  
53  
54  
55  
56  
57  
58  
59  
60

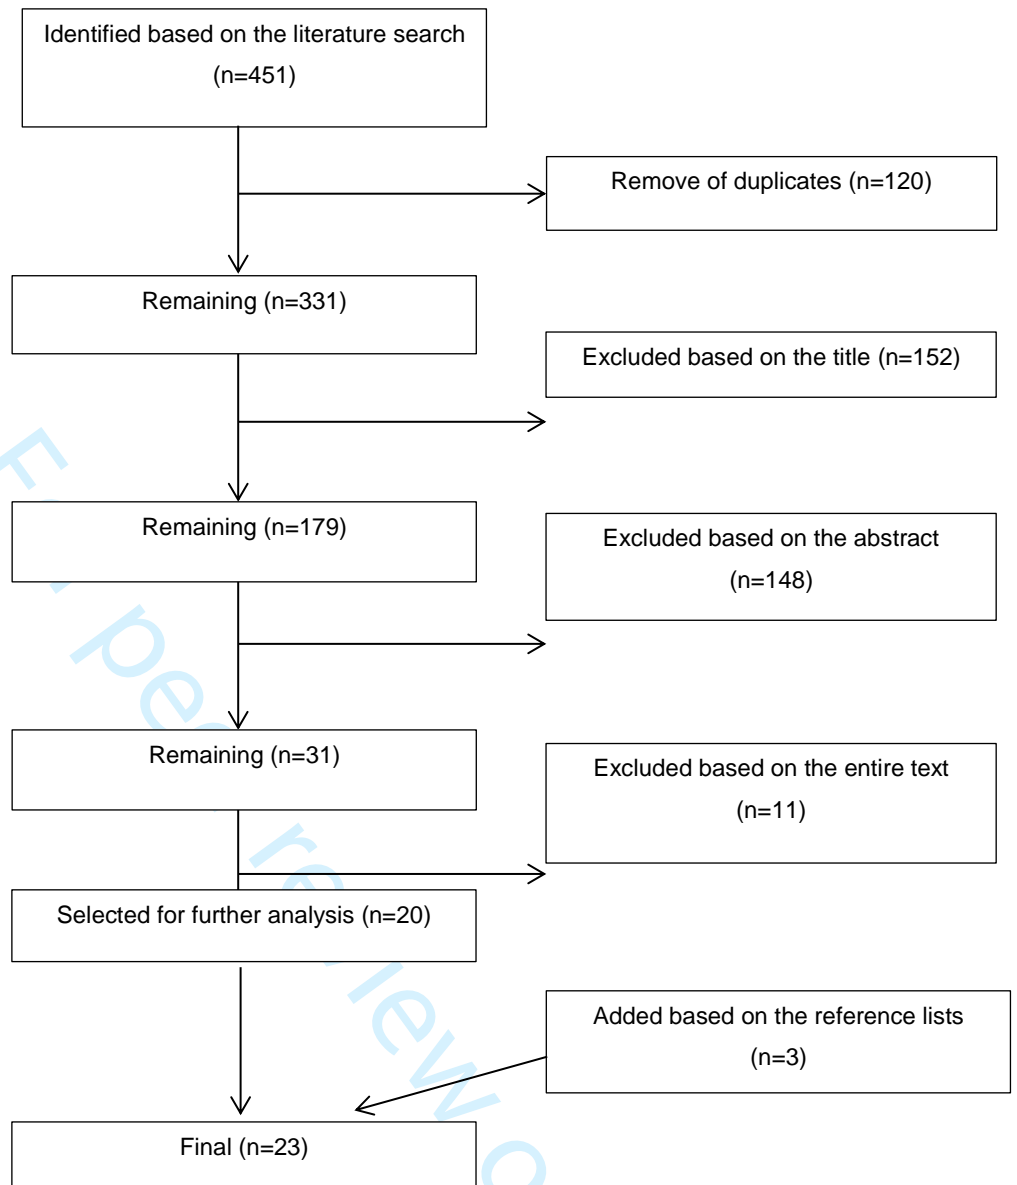

Figure 1. Flow chart on the review process.

1  
2  
3  
4  
5  
6  
7  
8  
9  
10  
11  
12  
13  
14  
15  
16  
17  
18  
19  
20  
21  
22  
23  
24  
25  
26  
27  
28  
29  
30  
31  
32  
33  
34  
35  
36  
37  
38  
39  
40  
41  
42  
43  
44  
45  
46  
47  
48  
49  
50  
51  
52  
53  
54  
55  
56  
57  
58  
59  
60

For peer review only



## Appendix 1. Literature search approach.

| Database     | Search terms                                                                                                                                                                                                                                                                                                                                                                                                                                                                                                                                                                                                                                                                                                                                                                                                                                                                                                                                                                                                                                                                                                                                                                                                                                                                                                                                                                                                                                                                                                                                                                                                                                                           |
|--------------|------------------------------------------------------------------------------------------------------------------------------------------------------------------------------------------------------------------------------------------------------------------------------------------------------------------------------------------------------------------------------------------------------------------------------------------------------------------------------------------------------------------------------------------------------------------------------------------------------------------------------------------------------------------------------------------------------------------------------------------------------------------------------------------------------------------------------------------------------------------------------------------------------------------------------------------------------------------------------------------------------------------------------------------------------------------------------------------------------------------------------------------------------------------------------------------------------------------------------------------------------------------------------------------------------------------------------------------------------------------------------------------------------------------------------------------------------------------------------------------------------------------------------------------------------------------------------------------------------------------------------------------------------------------------|
| MedLine Ovid | <p>(attitude* or stance* or opinion* or position* or orientat* or insight* or esteem* or estimat* or percepti* or belie* or decision* or decide* or determin* or prescrib* or chose* or choos* or choice* or guid* or recommend* or commission* or adopt* or accept* or uptak* best practice).mp AND (((physician.mp. or Physicians/) OR (clinician* or doctor* or specialist* or consultant*).mp.) AND (exp dermatology/ or exp internal medicine/ or exp endocrinology/ or exp gastroenterology/ or exp rheumatology/))</p> <p>OR (exp general practice/ or exp family practice/ or exp general practitioners/ or exp hospitalists/ or exp physicians, family/ or exp physicians, primary care/or physician.mp. or Physicians/ or (clinician* or doctor* or specialist* or consultant*).mp.) AND (exp DIABETES MELLITUS/ or diabetes.mp.)) AND (exp Biosimilar Pharmaceuticals/ or biosimilar*.mp.)</p> <p>(attitude* or stance* or opinion* or position* or orientat* or insight* or esteem* or estimat* or percepti* or belie* or decision* or decide* or determin* or prescrib* or chose* or choos* or choice* or guid* or recommend* or commission* or adopt* or accept* or uptak* best practice).mp AND (((Physicians/ or (physician* or clinician* or doctor* or specialist* or consultant*).mp.) AND (exp Biosimilar Pharmaceuticals/ or biosimilar*.mp.)</p>                                                                                                                                                                                                                                                                                                 |
| Scopus       | <p>TITLE-ABS-KEY ( biosimilar* AND ( ( ( physician* OR clinician* OR doctor* OR specialist* OR consultant* ) W/20 ( rheumatology OR gastroenterology OR endocrinology OR dermatology OR diabetes OR "internal medicine" ) ) OR ( rheumatologist* OR gastroenterologist* OR endocrinologist* OR dermatologist* OR hospitalist OR "General Practitioner*" OR physicians W/2 family ) ) AND</p> <p>( attitude* OR stance* OR opinion* OR position* OR orientat* OR insight* OR esteem* OR estimat* OR percepti* OR belie* OR decision* OR decide* OR determin* OR prescrib* OR choice* OR choos* OR chose* OR "best practice" OR guid* OR guide* OR recommend* OR commission* OR adopt* OR accept* OR uptak* ) ) AND ( LIMIT-TO ( SRCTYPE , "j " ) OR</p> <p>LIMIT-TO ( SRCTYPE , "p " ) ) AND ( LIMIT-TO ( DOCTYPE , "ar " ) OR</p> <p>LIMIT-TO ( DOCTYPE , "re " ) OR LIMIT-TO ( DOCTYPE , "cp " ) OR LIMIT-TO ( DOCTYPE , "ip " ) ) AND (</p> <p>LIMIT-TO ( LANGUAGE , "English " ) )</p> <p>TITLE-ABS-KEY(biosimilar* AND ( physician* OR clinician* OR doctor* OR specialist* OR consultant* ) AND (attitude* OR stance* OR opinion* OR position* OR orientat* OR insight* OR esteem* OR estimat* OR percepti* OR belie* OR decision* OR decide* OR determin* OR prescrib* OR choice* OR choos* OR chose* OR "best practice" OR guid* OR guide* OR recommend* OR commission* OR adopt* OR accept* OR uptak*)) AND ( LIMIT-TO ( SRCTYPE,"j " ) OR LIMIT-TO ( SRCTYPE,"p " ) ) AND</p> <p>( LIMIT-TO ( DOCTYPE,"ar " ) OR LIMIT-TO ( DOCTYPE,"re " ) OR LIMIT-TO ( DOCTYPE,"cp " ) OR</p> <p>LIMIT-TO ( DOCTYPE,"ip " ) ) AND ( LIMIT-TO ( LANGUAGE,"English " ) )</p> |

Appendix 2. Quality assessment protocol.

Date:

Evaluator:

Authors:

Title:

| Design                                                                                                 |          |             |         |       | Yes |
|--------------------------------------------------------------------------------------------------------|----------|-------------|---------|-------|-----|
| Meta-analysis                                                                                          |          |             |         |       |     |
| Randomized controlled trial                                                                            |          |             |         |       |     |
| Systematic review                                                                                      |          |             |         |       |     |
| Quantitative study: type (survey, pilot, other)                                                        |          |             |         |       |     |
| Qualitative study: type (interview, focus group, other)                                                |          |             |         |       |     |
| Other, what?                                                                                           |          |             |         |       |     |
|                                                                                                        | Yes (1p) | Partly (½p) | No (0p) | Notes |     |
| Aim and context                                                                                        |          |             |         |       |     |
| 1 Is there an explicit aim?                                                                            |          |             |         |       |     |
| 2 Is the context described?                                                                            |          |             |         |       |     |
| Methodology                                                                                            |          |             |         |       |     |
| 3 Is the data collection described accurately and is it repeatable?                                    |          |             |         |       |     |
| 4 Is the sample selection preventative/relevant/not strategic (sample selected intentionally)?         |          |             |         |       |     |
| 5 Is the dropout described?                                                                            |          |             |         |       |     |
| 6 Is the data analysis described accurately and is it repeatable?                                      |          |             |         |       |     |
| 7 Are the (statistical or other) methods adequate and applicable in relation to the aims of the study? |          |             |         |       |     |
| Results                                                                                                |          |             |         |       |     |
| 8 Are the findings logic, reliable and clearly displayed?                                              |          |             |         |       |     |
| Discussion and conclusions                                                                             |          |             |         |       |     |
| 9 Is there a critical discussion on the findings?                                                      |          |             |         |       |     |
| 10 Is there a critical discussion on the method?                                                       |          |             |         |       |     |
| 11 Is there a new value?                                                                               |          |             |         |       |     |
| 12 Are the aims of the study met in the results and findings of the study?                             |          |             |         |       |     |
| 13 Are the instruments valid?                                                                          |          |             |         |       |     |
| 14 Are the instruments reliable?                                                                       |          |             |         |       |     |
| Ethics                                                                                                 |          |             |         |       |     |
| 15 Is there an ethical discussion?                                                                     |          |             |         |       |     |
| 16 Are the authors non-dependable and free of any conflicts of interest?                               |          |             |         |       |     |
| 17 Did the participants participate without receiving a fee?                                           |          |             |         |       |     |
| TOTAL POINTS                                                                                           |          |             |         |       |     |

Quality assessment (rounded upwards when necessary): high: ≥ 15 yes, moderate: 12-14.5 yes, low: < 12 yes

Quality assessment protocol adapted from the protocols of Åkesson et al. (2006), Tong et al. (2007), Joanna Briggs Institute (2014) and Swedish Agency for Health Technology Assessment and Assessment of Social Services (2016).



# PRISMA 2009 Checklist

1  
2  
3  
4  
5  
6  
7  
8  
9  
10  
11  
12  
13  
14  
15  
16  
17  
18  
19  
20  
21  
22  
23  
24  
25  
26  
27  
28  
29  
30  
31  
32  
33  
34  
35  
36  
37  
38  
39  
40  
41  
42  
43  
44  
45  
46  
47

| Section/topic                      | #  | Checklist item                                                                                                                                                                                                                                                                                              | Reported on section (in the main document without)                                                    |
|------------------------------------|----|-------------------------------------------------------------------------------------------------------------------------------------------------------------------------------------------------------------------------------------------------------------------------------------------------------------|-------------------------------------------------------------------------------------------------------|
| <b>TITLE</b>                       |    |                                                                                                                                                                                                                                                                                                             |                                                                                                       |
| Title                              | 1  | Identify the report as a systematic review, meta-analysis, or both.                                                                                                                                                                                                                                         | Title page, p1                                                                                        |
| <b>ABSTRACT</b>                    |    |                                                                                                                                                                                                                                                                                                             |                                                                                                       |
| Structured summary                 | 2  | Provide a structured summary including, as applicable: background; objectives; data sources; study eligibility criteria, participants, and interventions; study appraisal and synthesis methods; results; limitations; conclusions and implications of key findings; systematic review registration number. | Title page, p1, according to BMJ Open abstract structure                                              |
| <b>INTRODUCTION</b>                |    |                                                                                                                                                                                                                                                                                                             |                                                                                                       |
| Rationale                          | 3  | Describe the rationale for the review in the context of what is already known.                                                                                                                                                                                                                              | Introduction, starting from p2                                                                        |
| Objectives                         | 4  | Provide an explicit statement of questions being addressed with reference to participants, interventions, comparisons, outcomes, and study design (PICOS).                                                                                                                                                  | Objectives (at the last paragraph of the Introduction), p2                                            |
| <b>METHODS</b>                     |    |                                                                                                                                                                                                                                                                                                             |                                                                                                       |
| Protocol and registration          | 5  | Indicate if a review protocol exists, if and where it can be accessed (e.g., Web address), and, if available, provide registration information including registration number.                                                                                                                               | Material and methods, paragraph: Quality assessment, with an appendix and appropriate referencing, p3 |
| Eligibility criteria               | 6  | Specify study characteristics (e.g., PICOS, length of follow-up) and report characteristics (e.g., years considered, language, publication status) used as criteria for eligibility, giving rationale.                                                                                                      | Tables 1 and 2                                                                                        |
| Information sources                | 7  | Describe all information sources (e.g., databases with dates of coverage, contact with study authors to identify additional studies) in the search and date last searched.                                                                                                                                  | Appendix 1 in the Supplementary Files                                                                 |
| Search                             | 8  | Present full electronic search strategy for at least one database, including any limits used, such that it could be repeated.                                                                                                                                                                               | Appendix 1 in the Supplementary Files                                                                 |
| Study selection                    | 9  | State the process for selecting studies (i.e., screening, eligibility, included in systematic review, and, if applicable, included in the meta-analysis).                                                                                                                                                   | Material and methods: Literature search, p2–3 and Table 1, p3                                         |
| Data collection process            | 10 | Describe method of data extraction from reports (e.g., piloted forms, independently, in duplicate) and any processes for obtaining and confirming data from investigators.                                                                                                                                  | Material and methods: Data extraction and analysis, p3                                                |
| Data items                         | 11 | List and define all variables for which data were sought (e.g., PICOS, funding sources) and any assumptions and simplifications made.                                                                                                                                                                       | Material and methods: Data extraction and analysis, p3                                                |
| Risk of bias in individual studies | 12 | Describe methods used for assessing risk of bias of individual studies (including specification of whether this was done at the study or outcome level), and how this information is to be used in any data synthesis.                                                                                      | Material and methods: Quality assessment, p3 and Table 3                                              |
| Summary measures                   | 13 | State the principal summary measures (e.g., risk ratio, difference in means).                                                                                                                                                                                                                               | Not applicable                                                                                        |
| Synthesis of results               | 14 | Describe the methods of handling data and combining results of studies, if done, including measures of consistency (e.g., $I^2$ ) for each meta-analysis.                                                                                                                                                   | Not applicable                                                                                        |

For peer review only - <http://bmjopen.bmj.com/site/about/guidelines.xhtml>

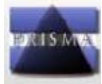

# PRISMA 2009 Checklist

Page 1 of 2

| Section/topic                 | #  | Checklist item                                                                                                                                                                                           | Reported on section                     |
|-------------------------------|----|----------------------------------------------------------------------------------------------------------------------------------------------------------------------------------------------------------|-----------------------------------------|
| Risk of bias across studies   | 15 | Specify any assessment of risk of bias that may affect the cumulative evidence (e.g., publication bias, selective reporting within studies).                                                             | Table 3                                 |
| Additional analyses           | 16 | Describe methods of additional analyses (e.g., sensitivity or subgroup analyses, meta-regression), if done, indicating which were pre-specified.                                                         | Not applicable                          |
| <b>RESULTS</b>                |    |                                                                                                                                                                                                          |                                         |
| Study selection               | 17 | Give numbers of studies screened, assessed for eligibility, and included in the review, with reasons for exclusions at each stage, ideally with a flow diagram.                                          | Figure 1                                |
| Study characteristics         | 18 | For each study, present characteristics for which data were extracted (e.g., study size, PICOS, follow-up period) and provide the citations.                                                             | Table 2                                 |
| Risk of bias within studies   | 19 | Present data on risk of bias of each study and, if available, any outcome level assessment (see item 12).                                                                                                | Table 3                                 |
| Results of individual studies | 20 | For all outcomes considered (benefits or harms), present, for each study: (a) simple summary data for each intervention group (b) effect estimates and confidence intervals, ideally with a forest plot. | Not applicable                          |
| Synthesis of results          | 21 | Present results of each meta-analysis done, including confidence intervals and measures of consistency.                                                                                                  | Not applicable                          |
| Risk of bias across studies   | 22 | Present results of any assessment of risk of bias across studies (see item 15).                                                                                                                          | Results: Quality assessment, Table 3    |
| Additional analysis           | 23 | Give results of additional analyses, if done (e.g., sensitivity or subgroup analyses, meta-regression [see item 16]).                                                                                    | Not applicable                          |
| <b>DISCUSSION</b>             |    |                                                                                                                                                                                                          |                                         |
| Summary of evidence           | 24 | Summarize the main findings including the strength of evidence for each main outcome; consider their relevance to key groups (e.g., healthcare providers, users, and policy makers).                     | Discussion, p14 onwards, Tables 2 and 3 |
| Limitations                   | 25 | Discuss limitations at study and outcome level (e.g., risk of bias), and at review-level (e.g., incomplete retrieval of identified research, reporting bias).                                            | Discussion, p14 onwards                 |
| Conclusions                   | 26 | Provide a general interpretation of the results in the context of other evidence, and implications for future research.                                                                                  | Conclusions, p14 onwards                |
| <b>FUNDING</b>                |    |                                                                                                                                                                                                          |                                         |
| Funding                       | 27 | Describe sources of funding for the systematic review and other support (e.g., supply of data); role of funders for the systematic review.                                                               | Funding, p15                            |

From: Moher D, Liberati A, Tetzlaff J, Altman DG, The PRISMA Group (2009). Preferred Reporting Items for Systematic Reviews and Meta-Analyses: The PRISMA Statement. PLoS Med 6(7): e1000097. doi:10.1371/journal.pmed1000097

For more information, visit: [www.prisma-statement.org](http://www.prisma-statement.org).

Page 2 of 2

For peer review only - <http://bmjopen.bmj.com/site/about/guidelines.xhtml>
